# Supplementary material
Source: PubMed Central journal article supplement (PMC4001396)

## Sugar beet (*Beta vulgaris*)

Examples of DAPI stained mesophyll cells of leaf stages y1 - y4 and I

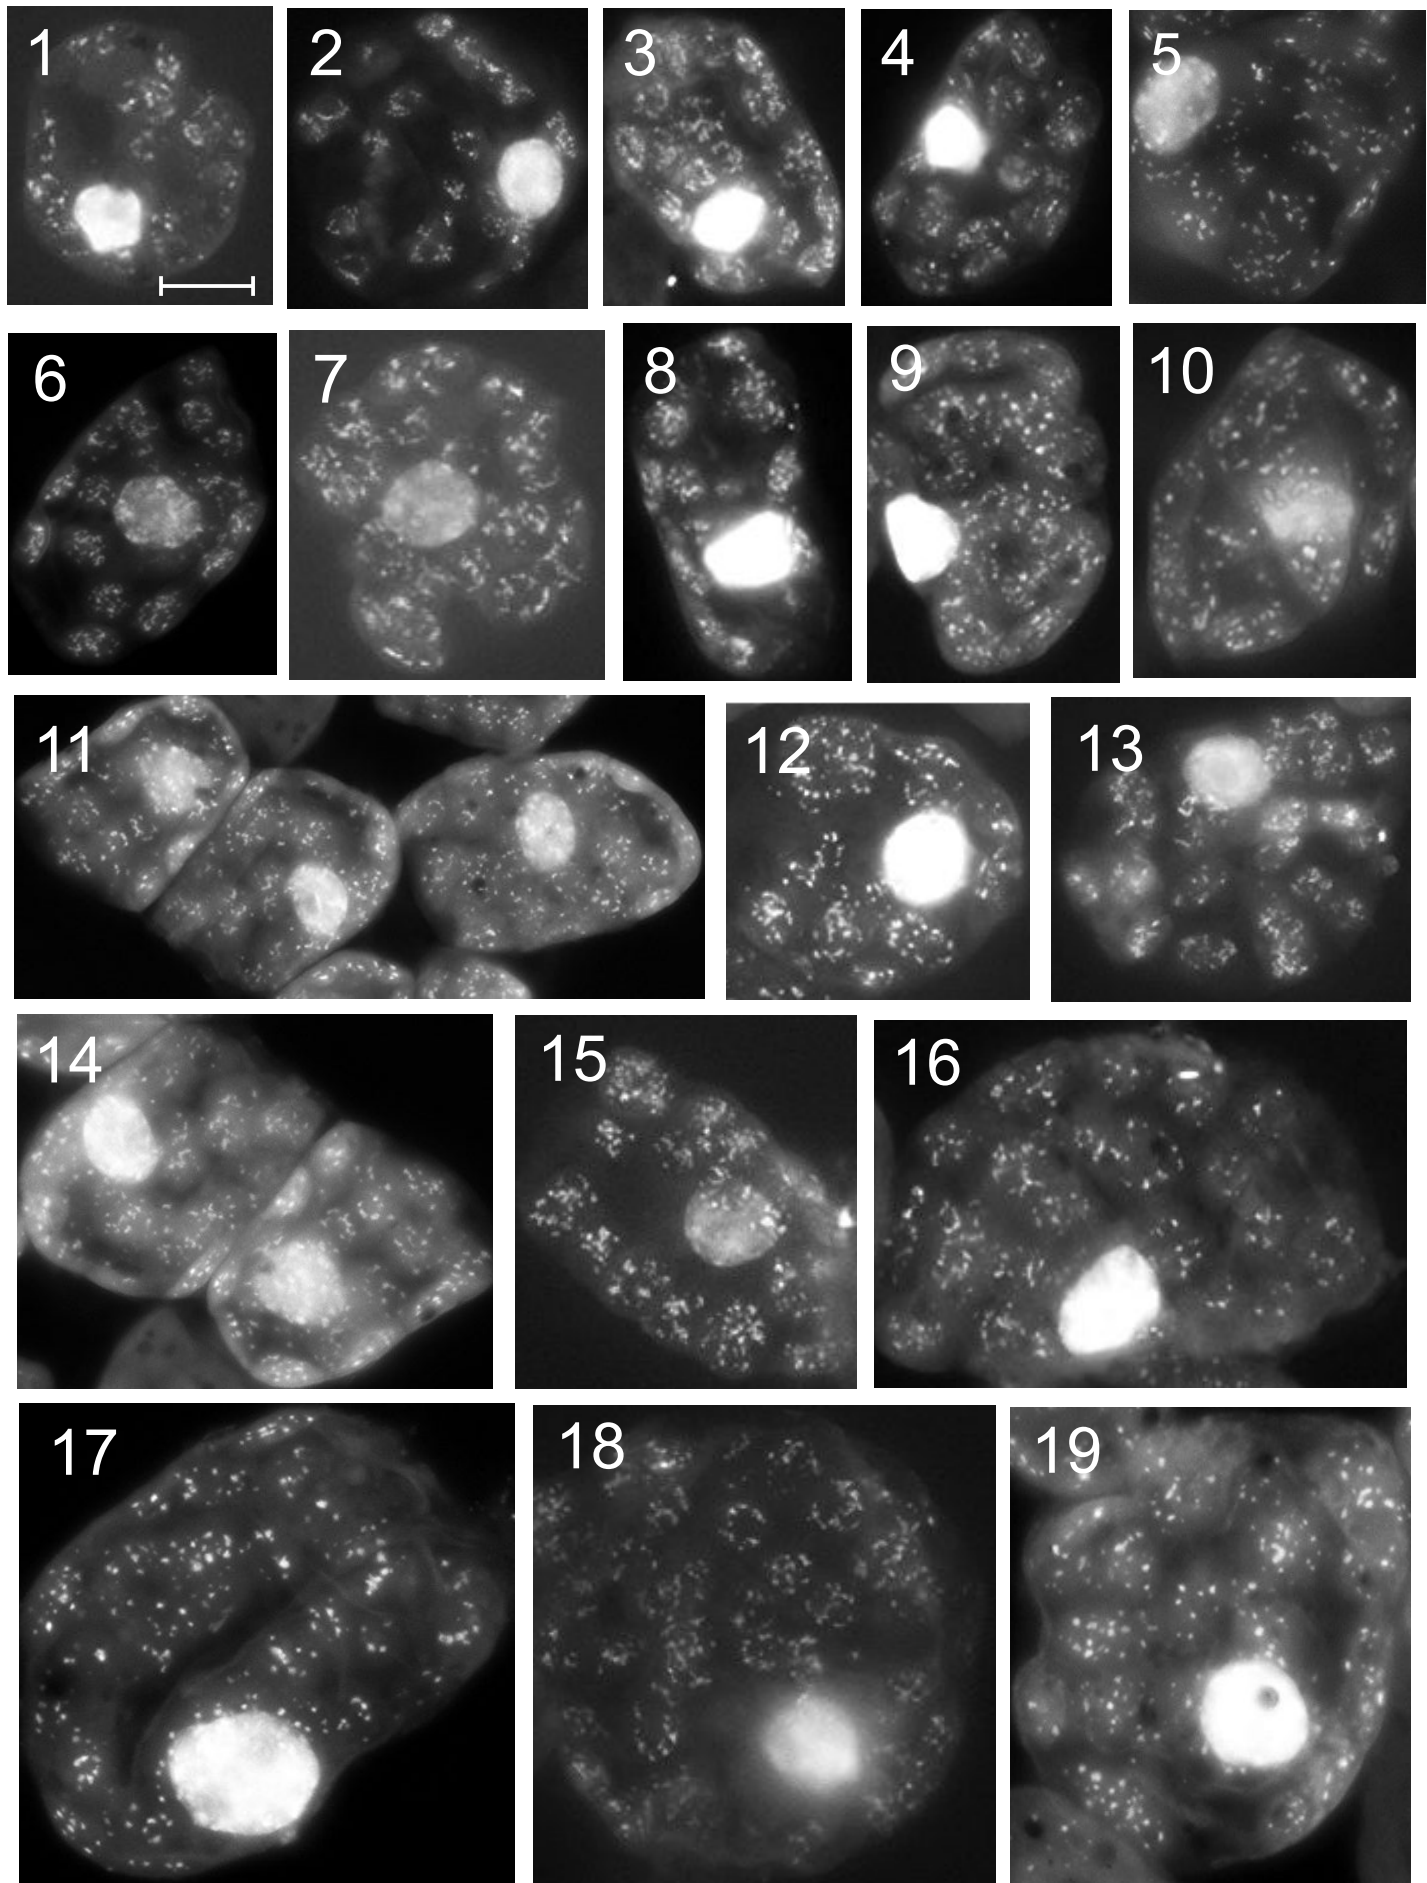

Bar: 5  $\mu$ m, in (1) also for (2 - 83)

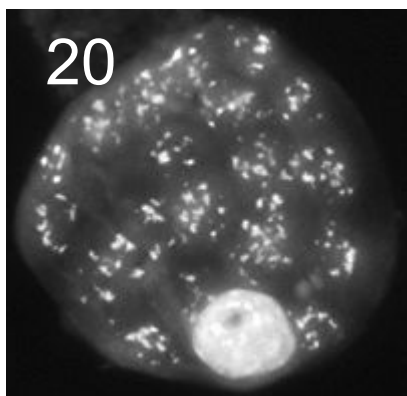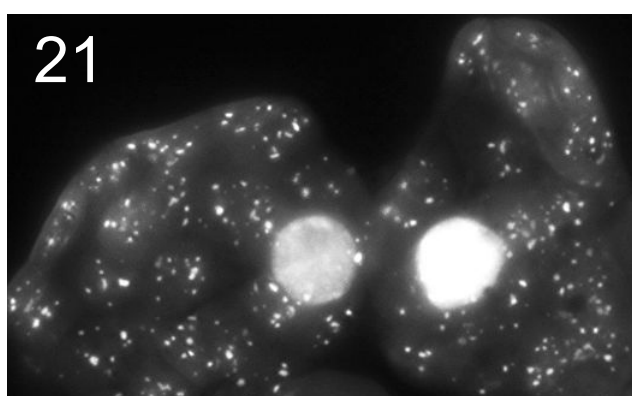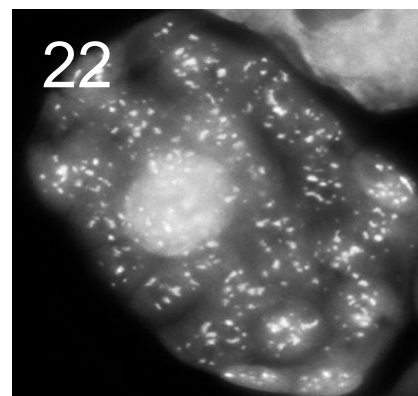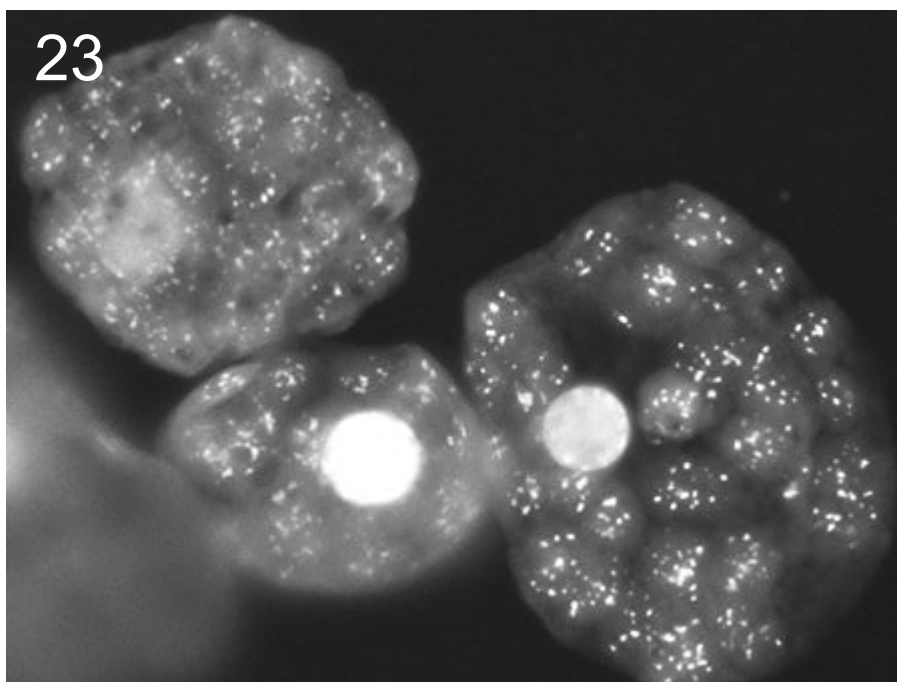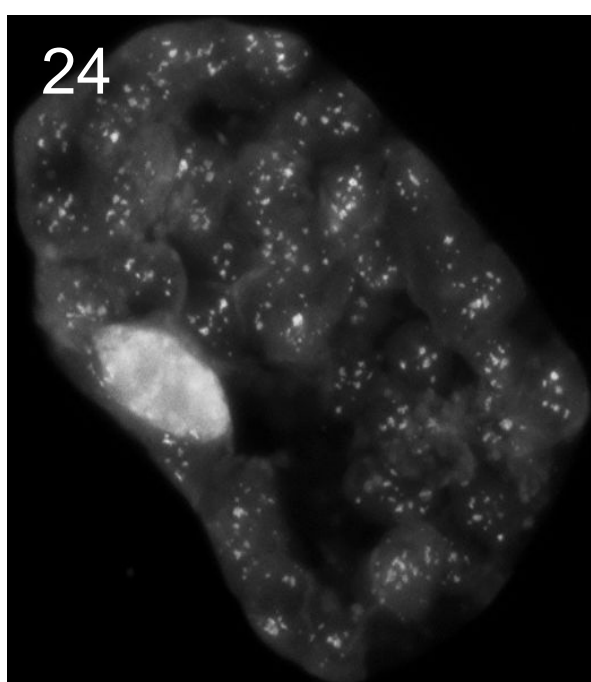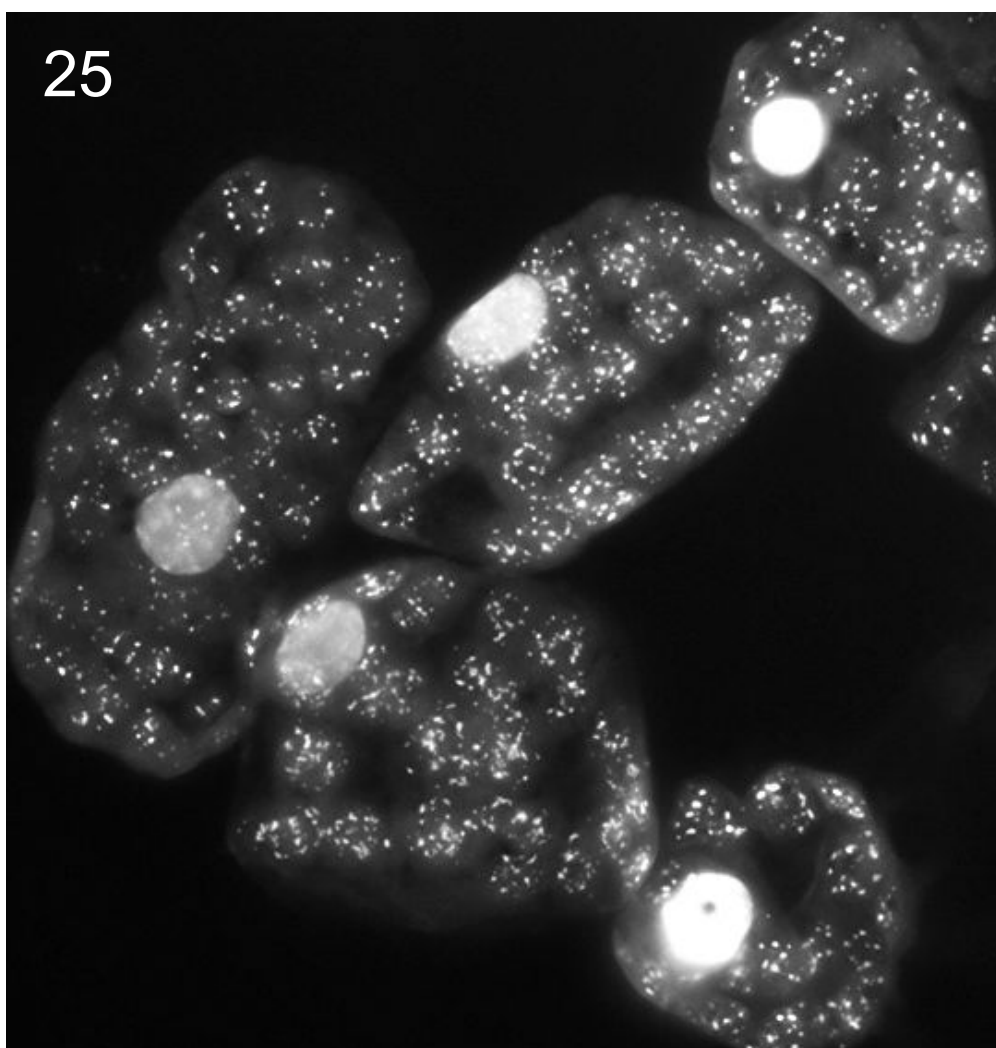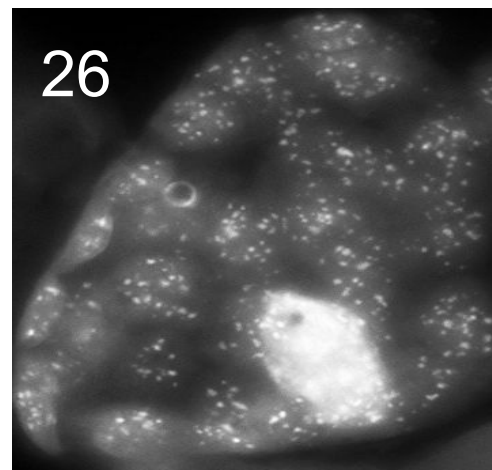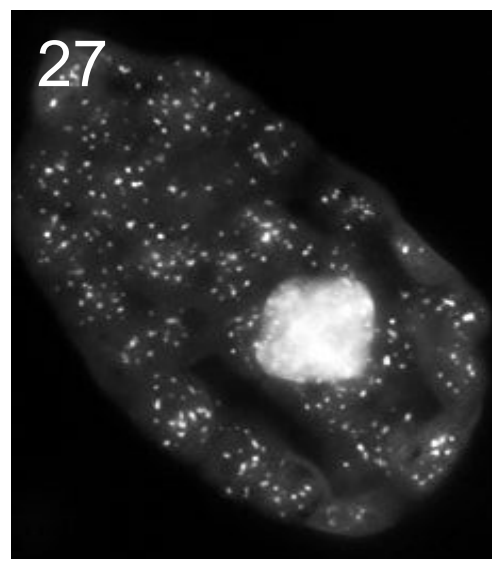

Examples of DAPI stained mesophyll cells of leaf stages II and III

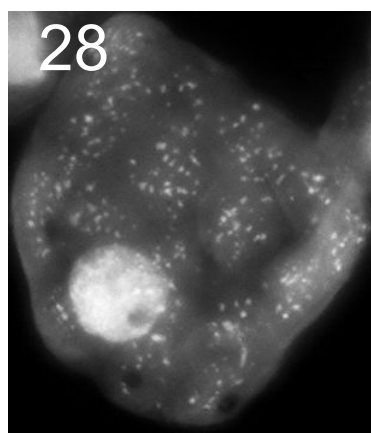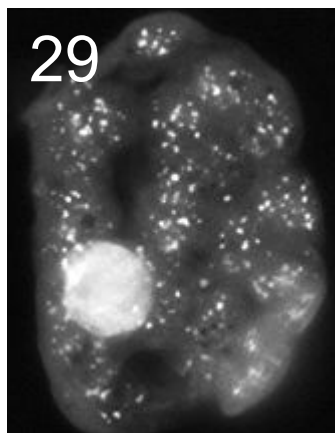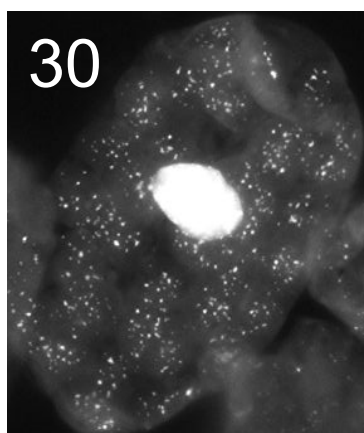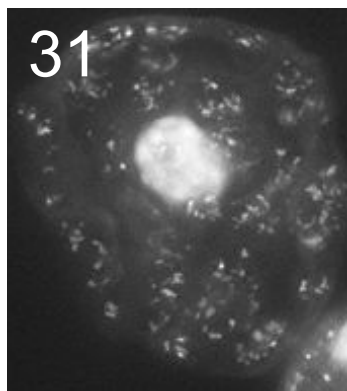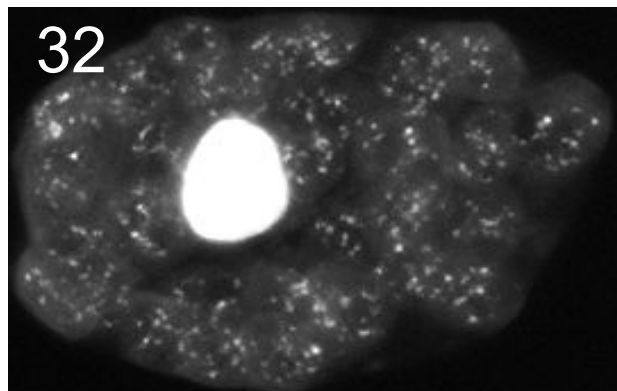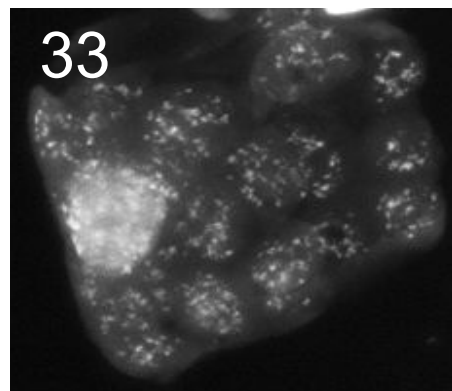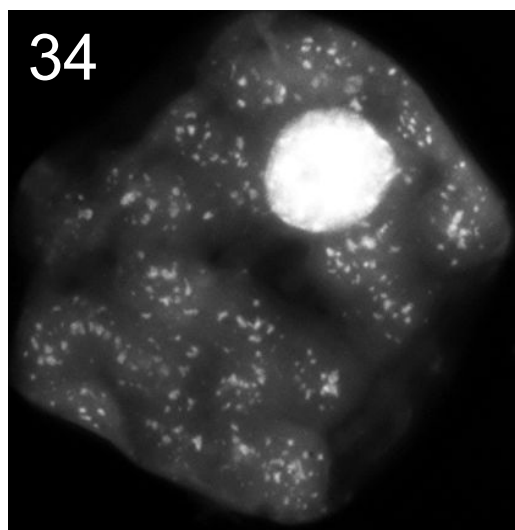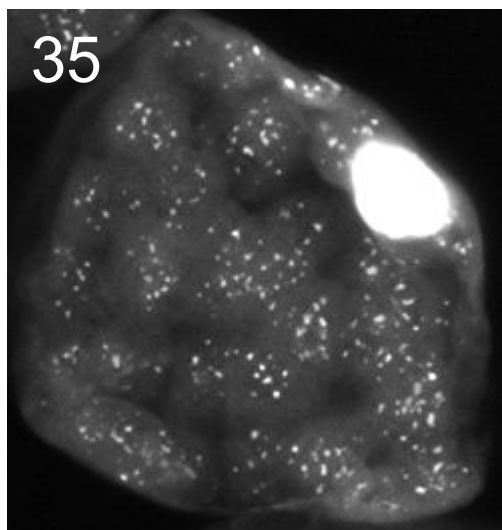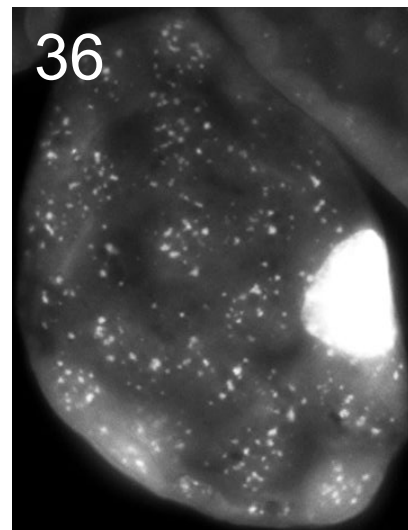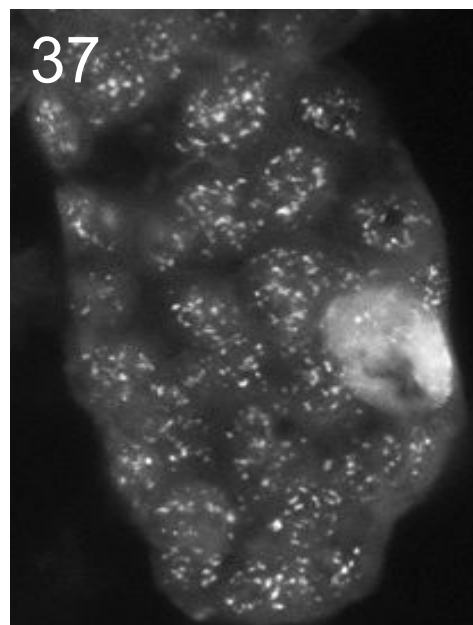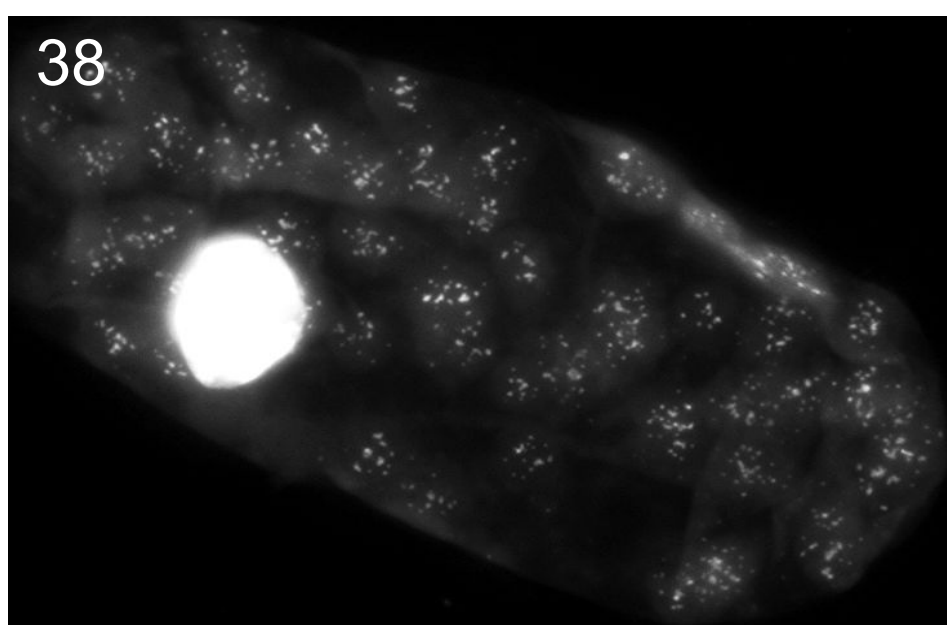

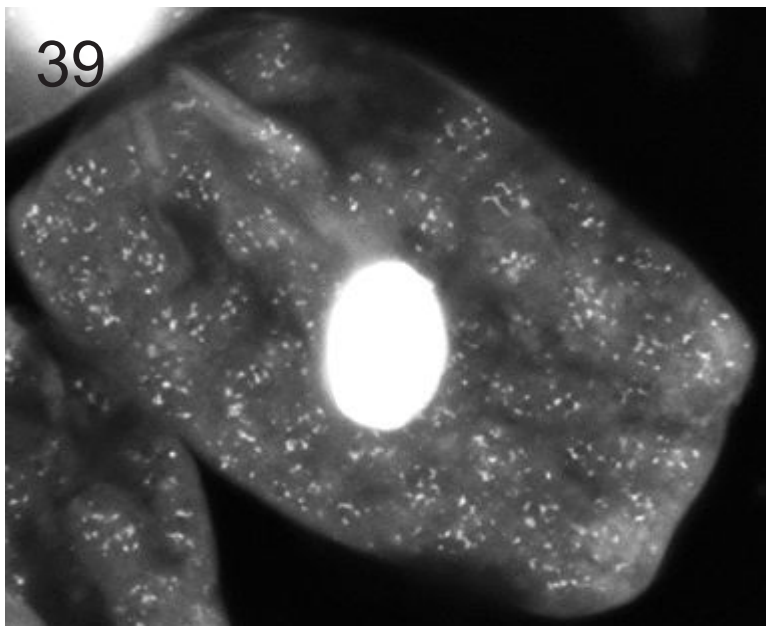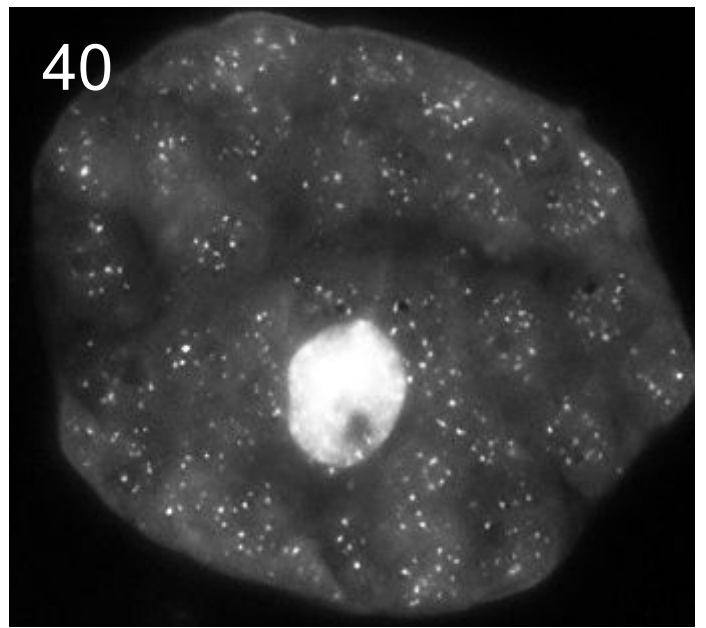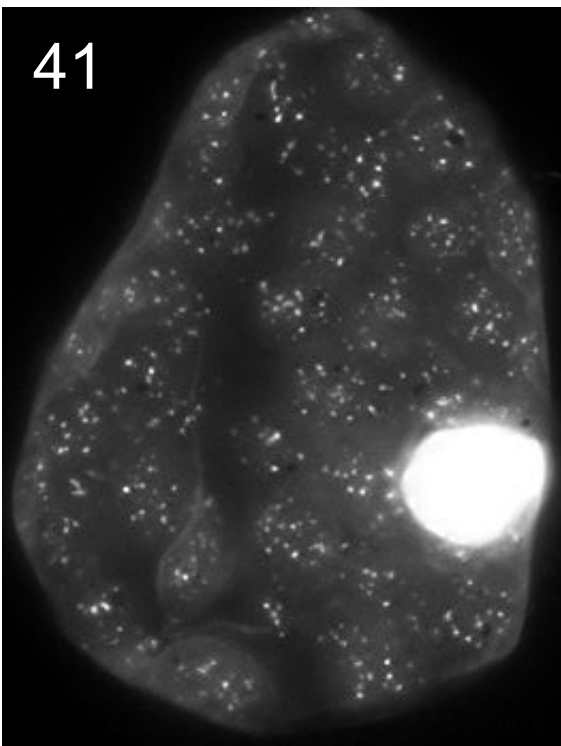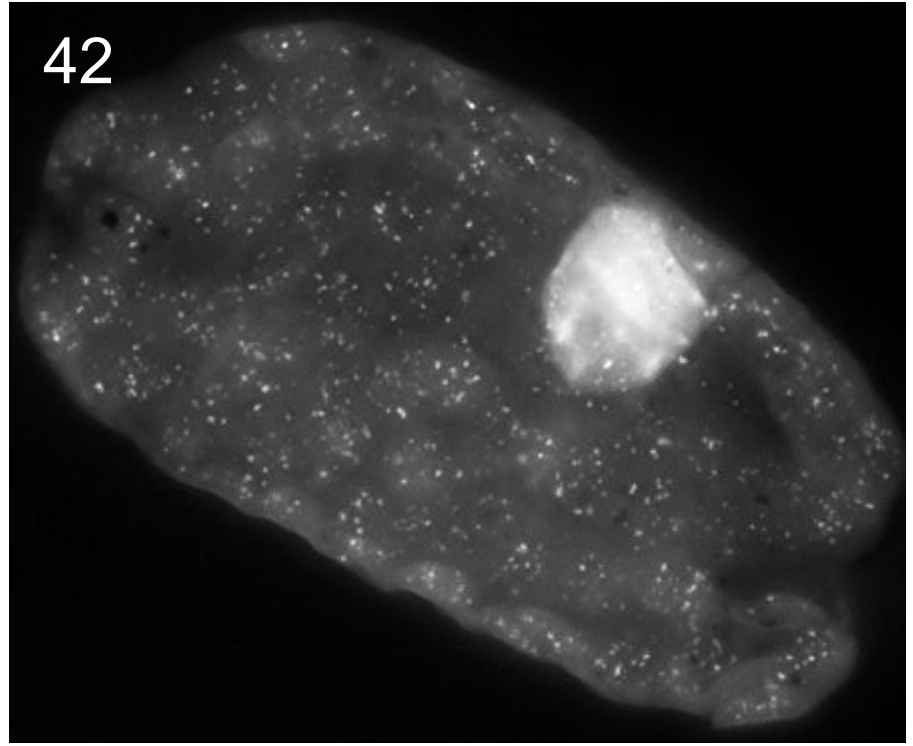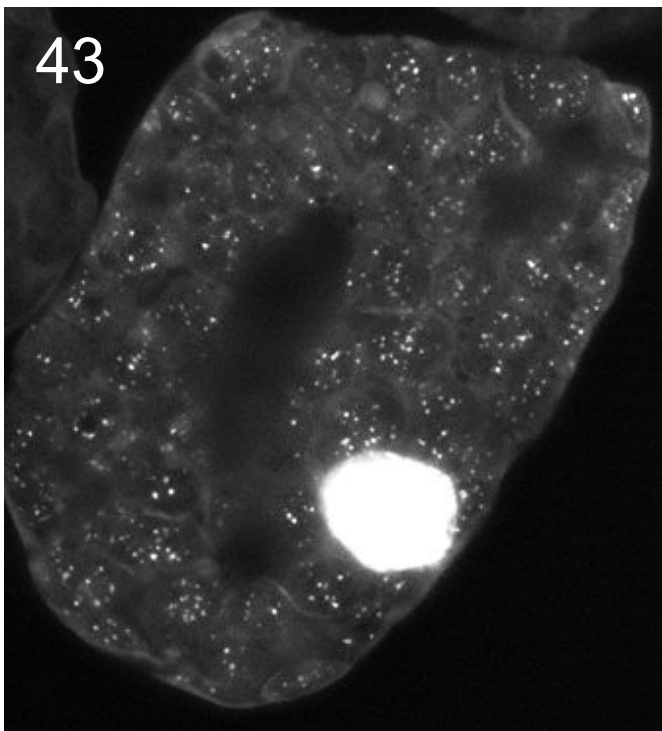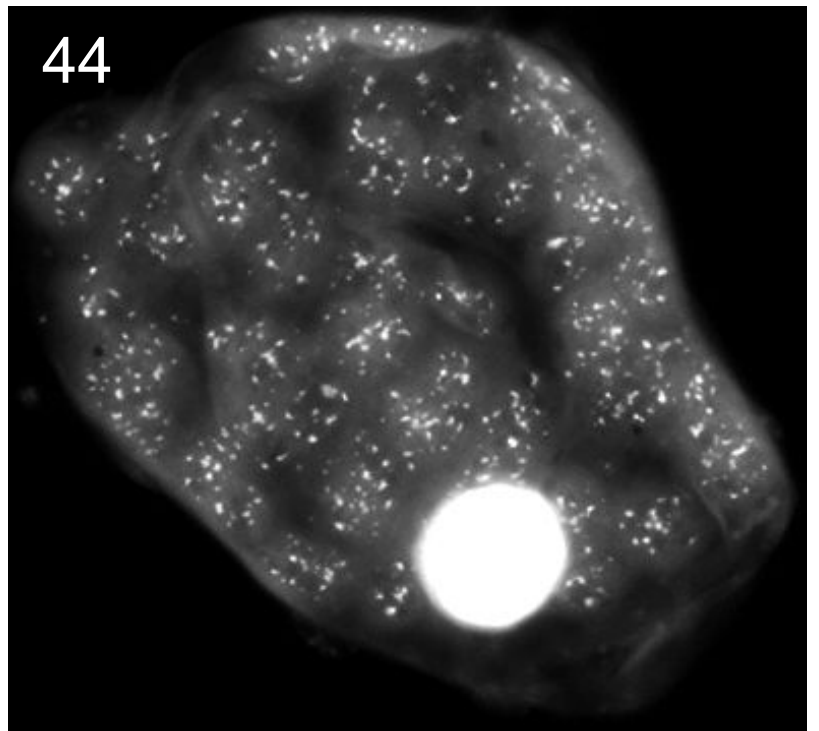

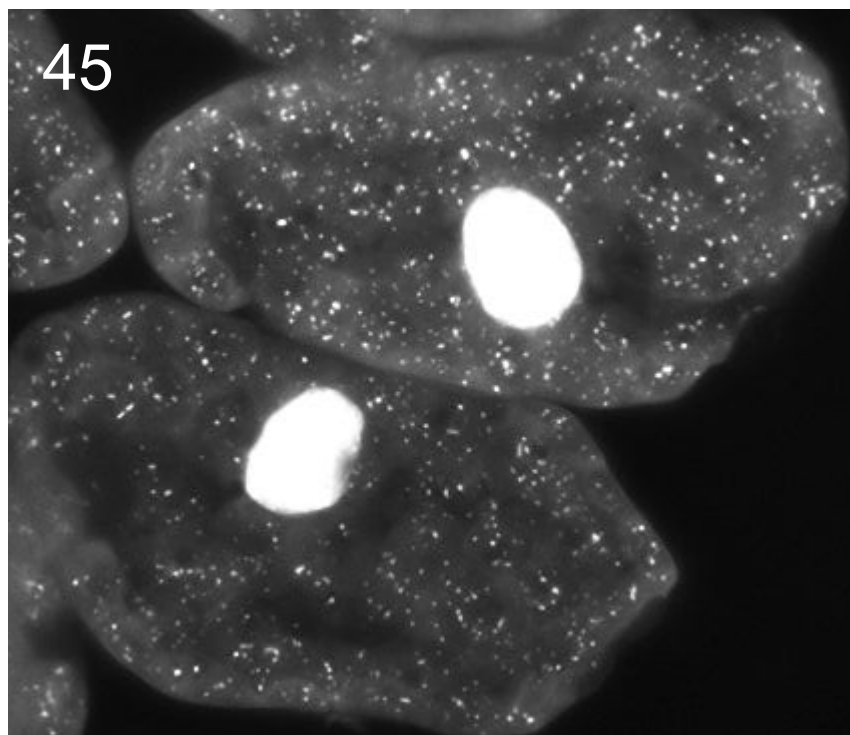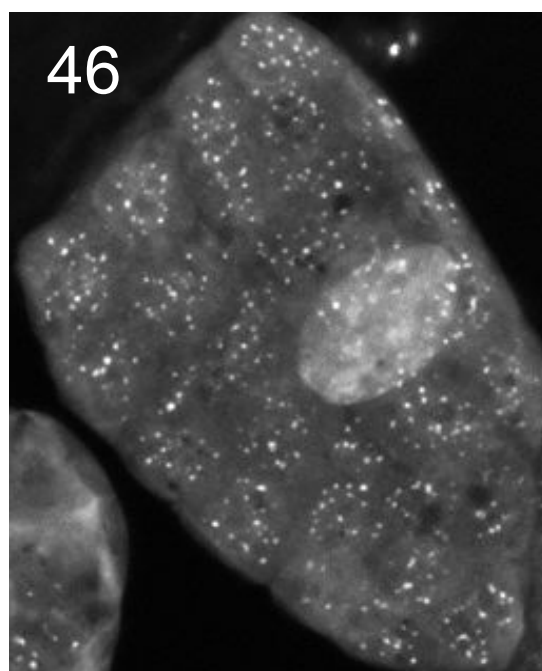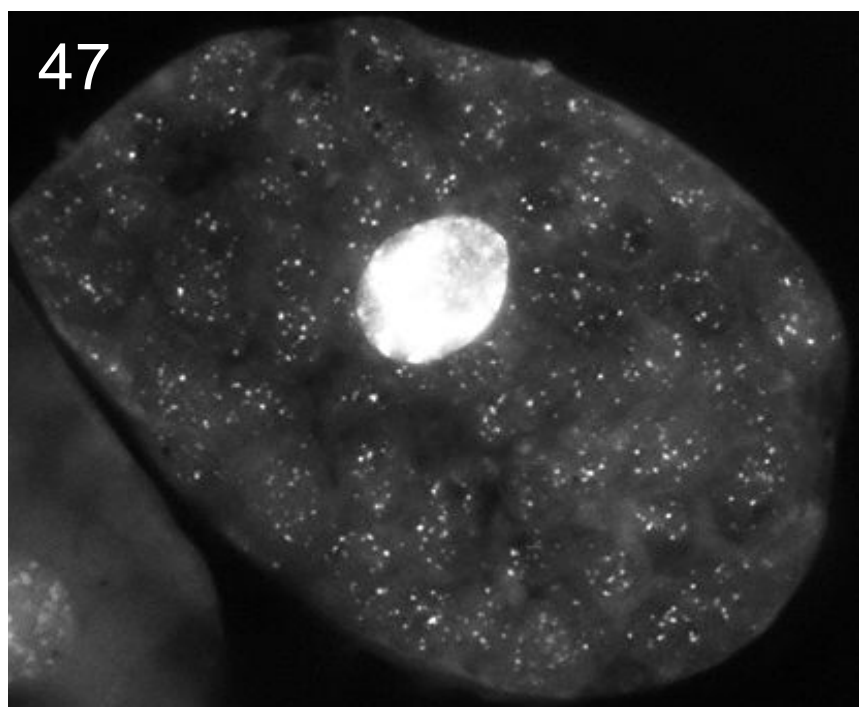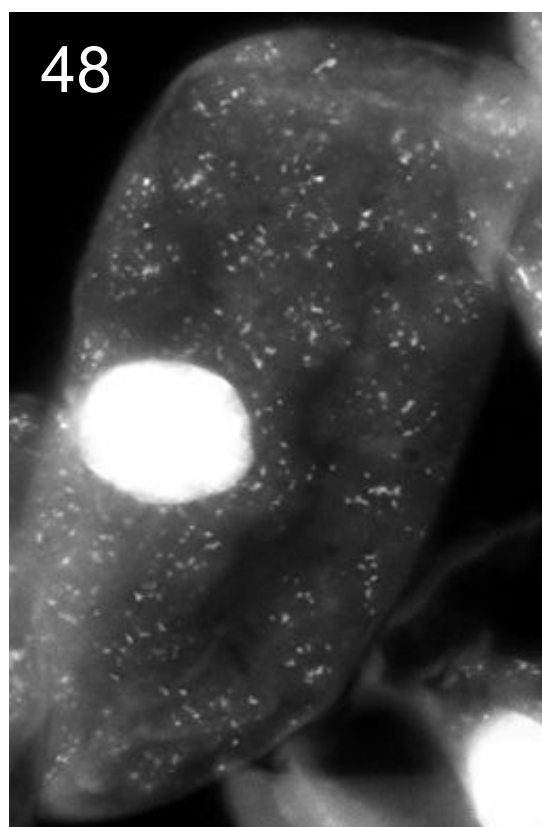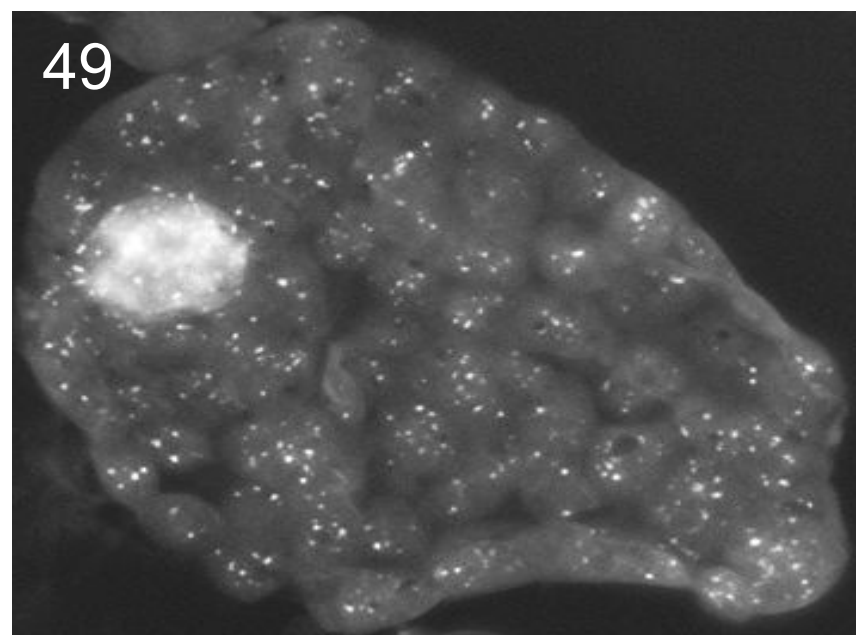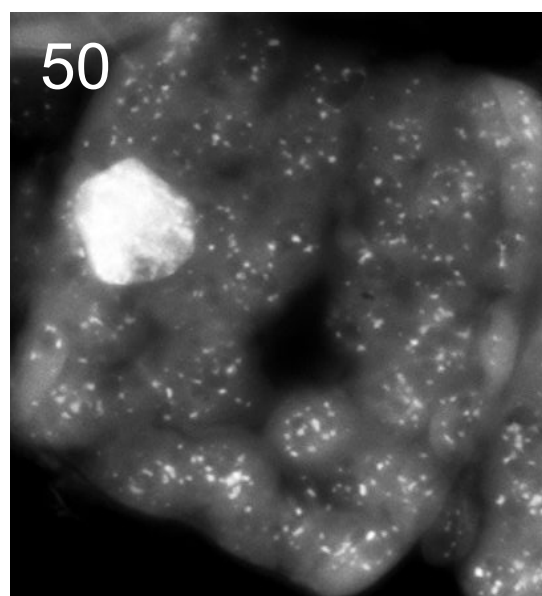

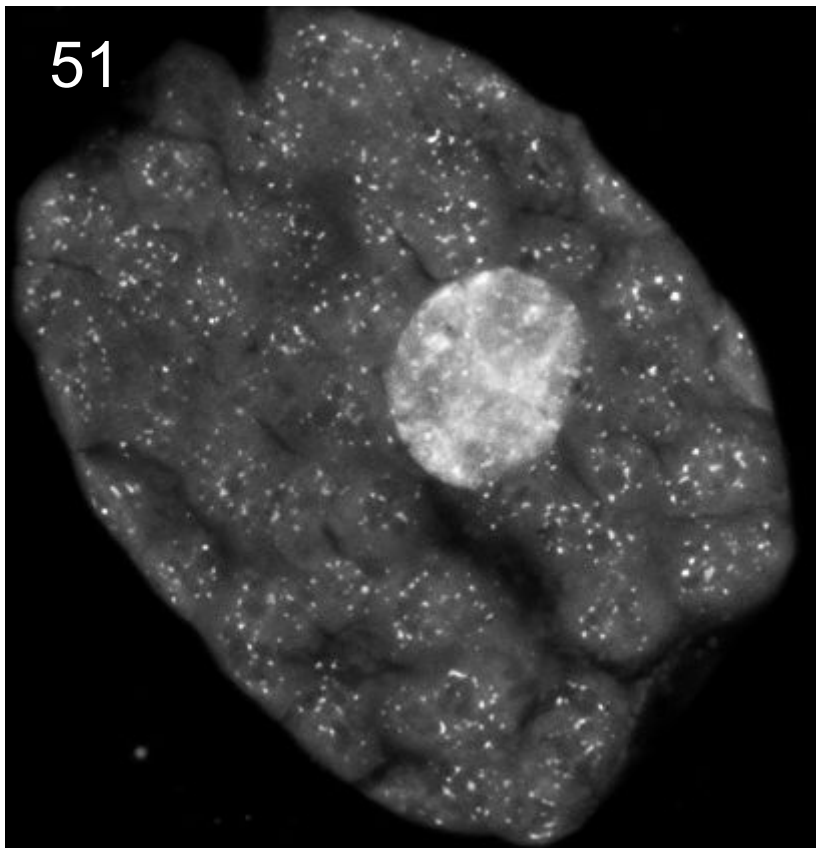

Examples of DAPI stained mesophyll cells of leaf stages IV

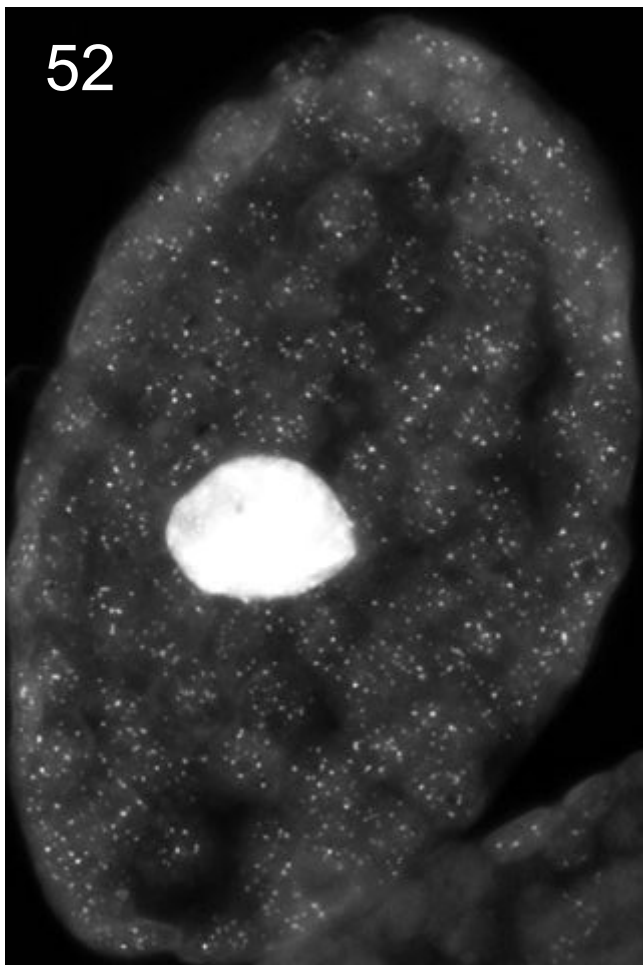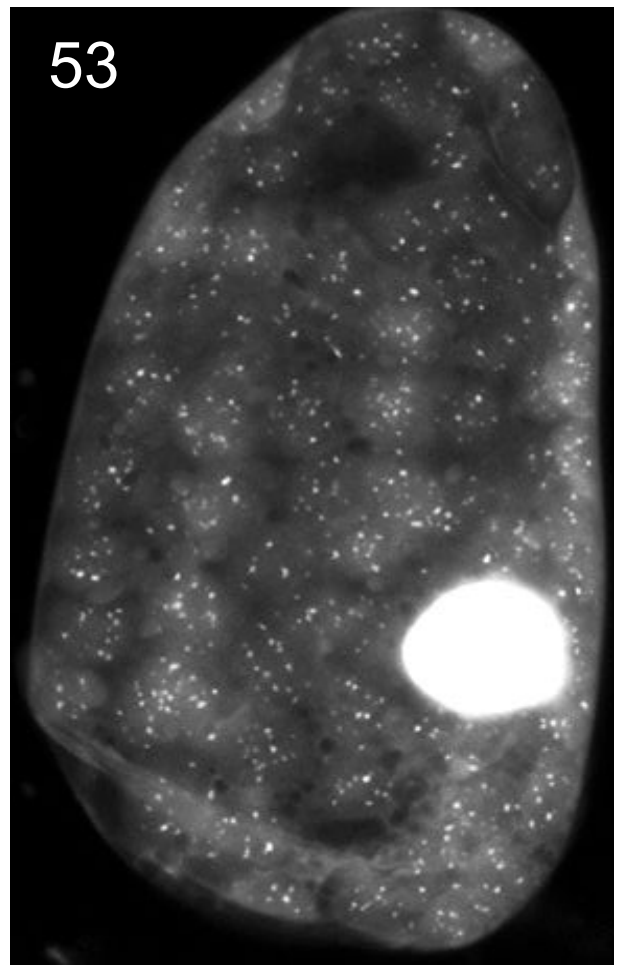

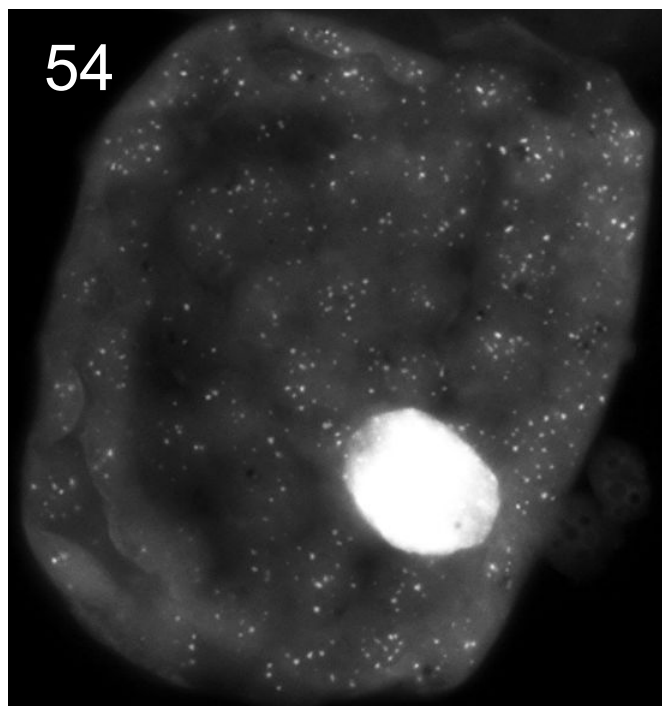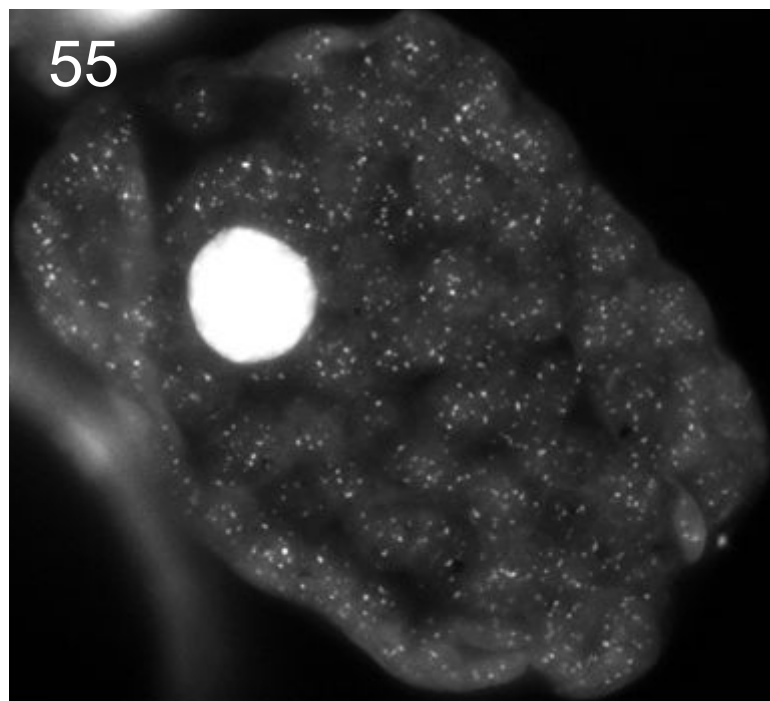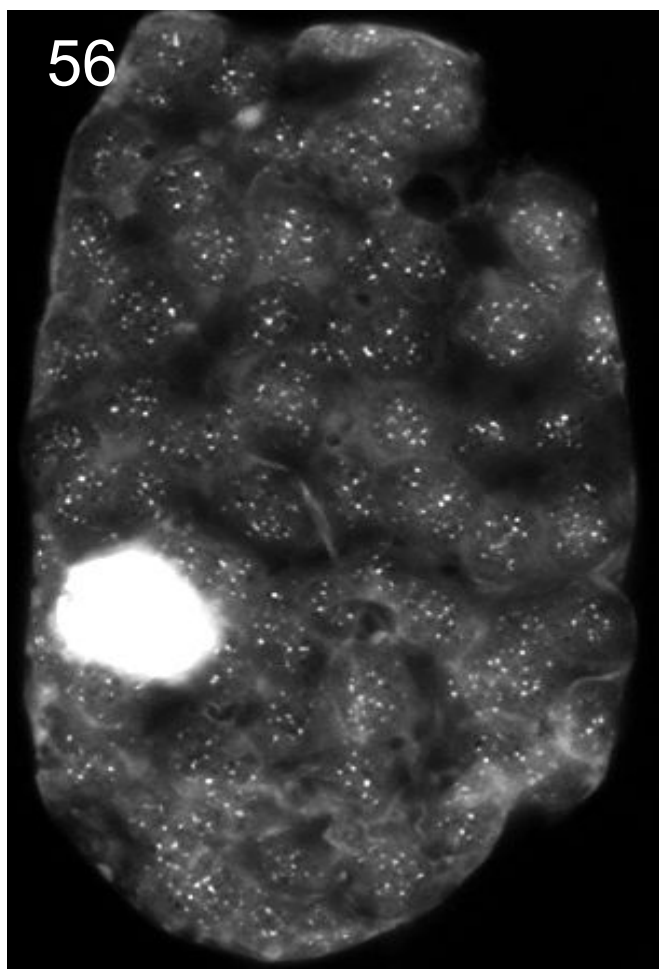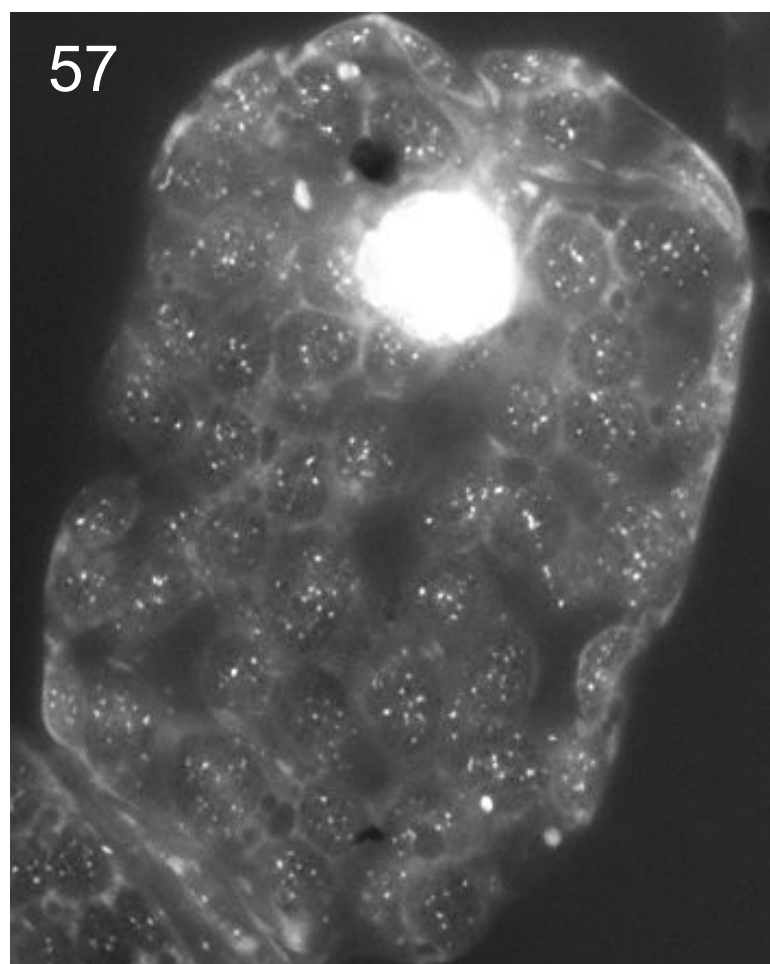

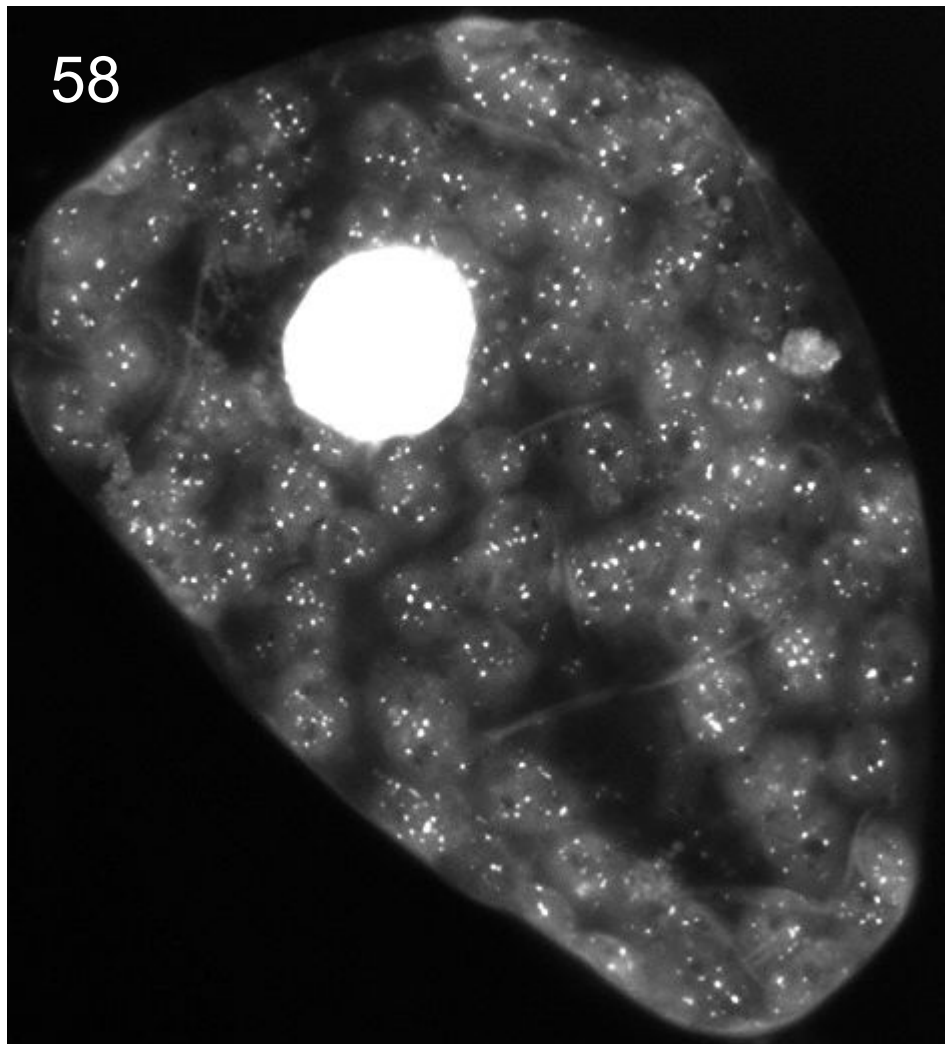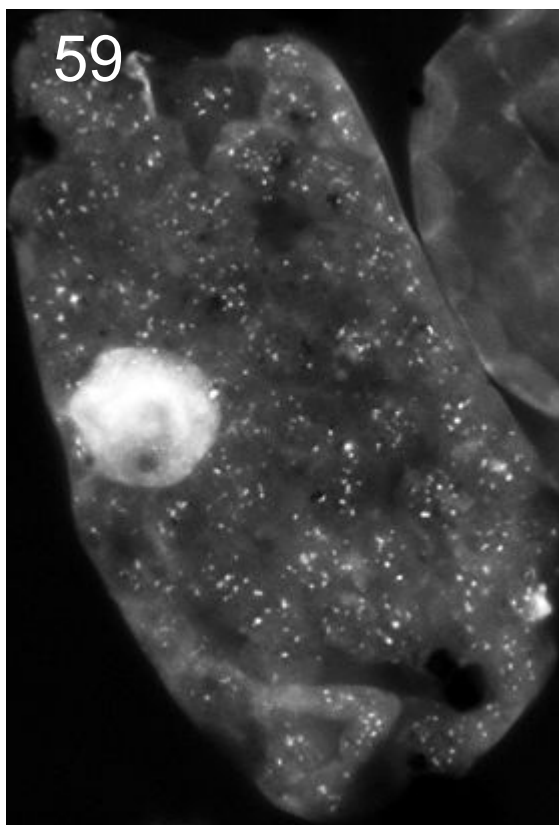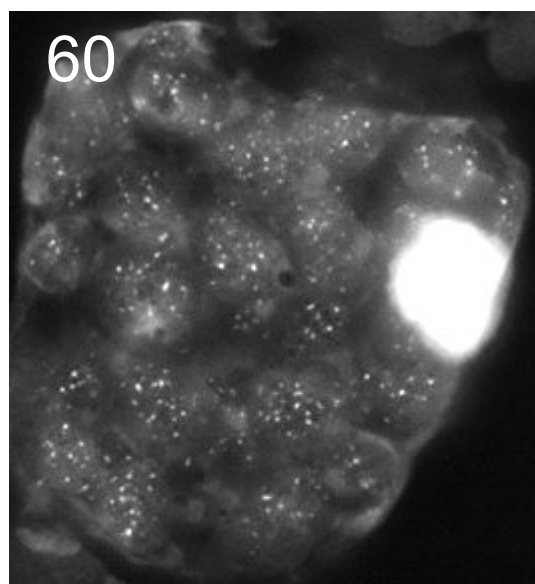



Examples of DAPI stained mesophyll cells of leaf stages V

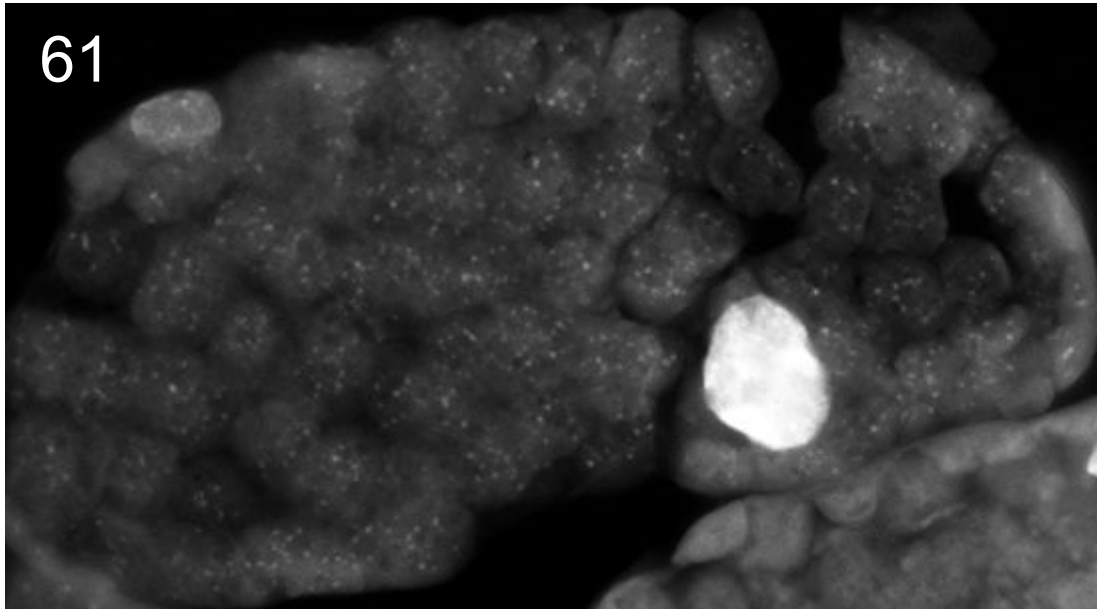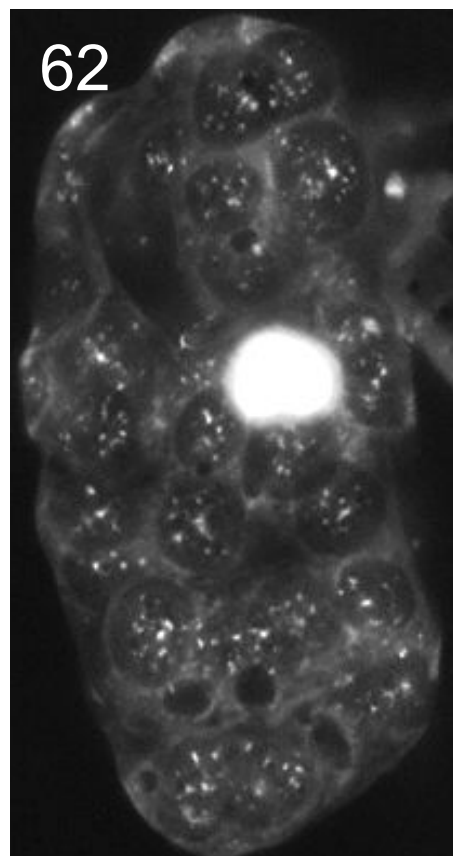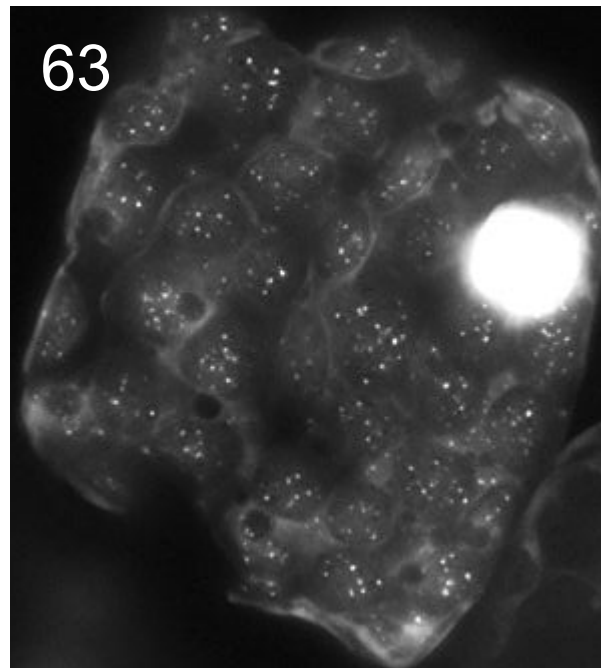

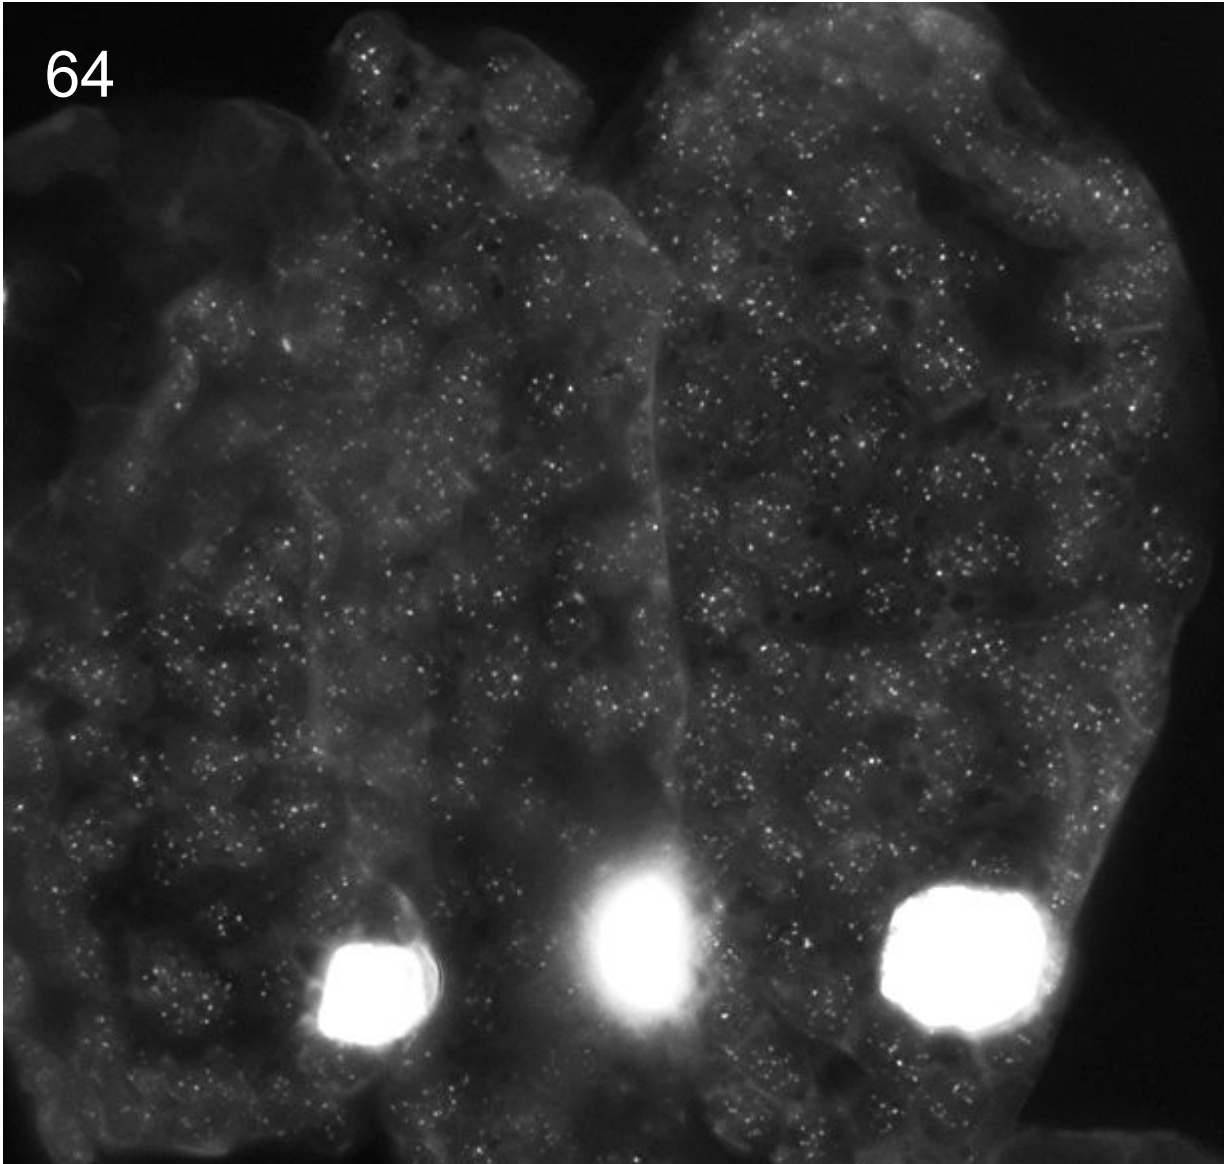

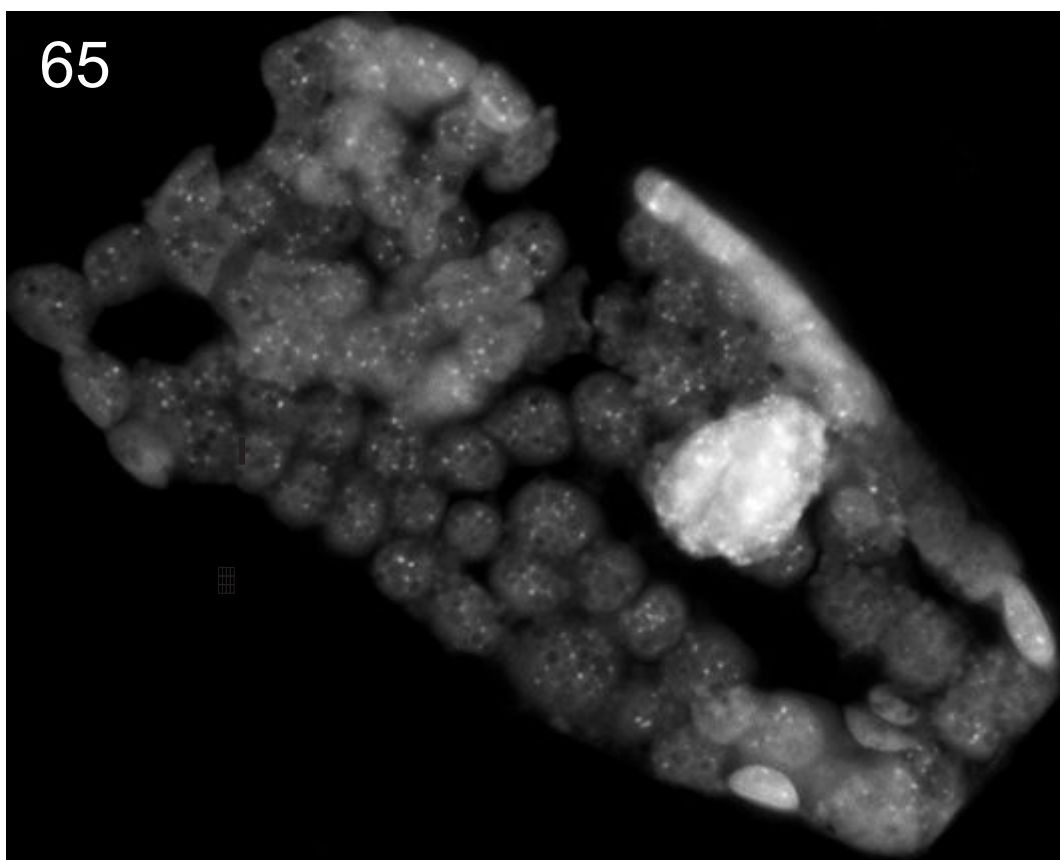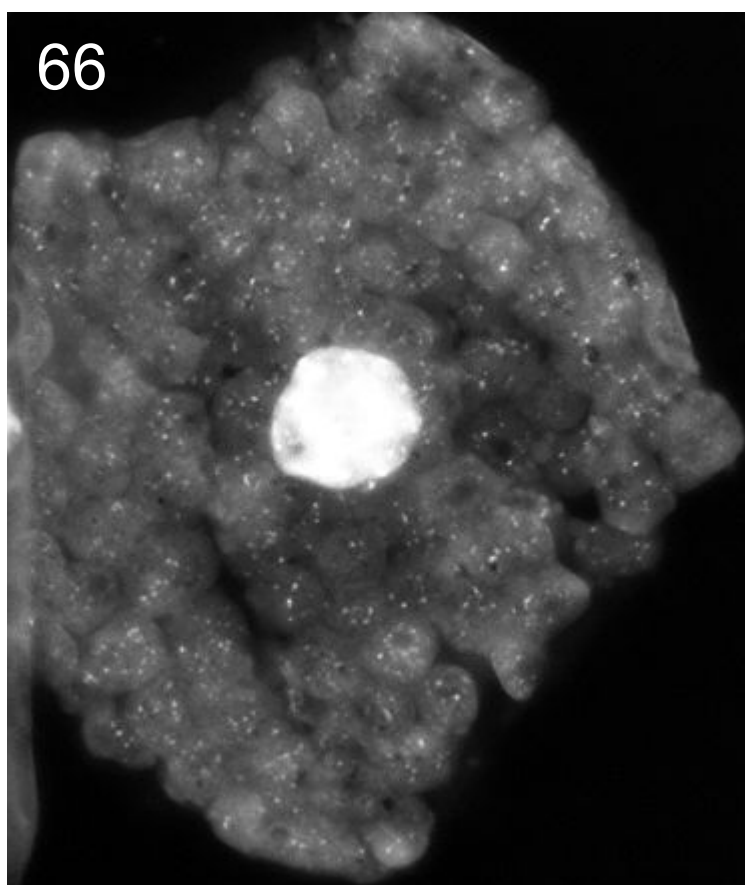

Examples of DAPI stained mesophyll cells or cell fragmenst of of leaf stages VI

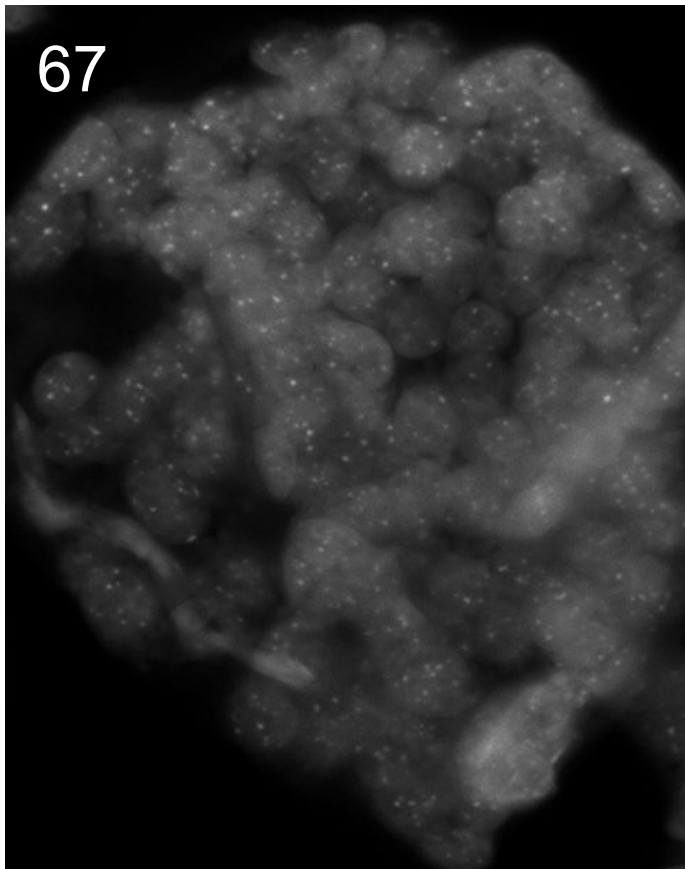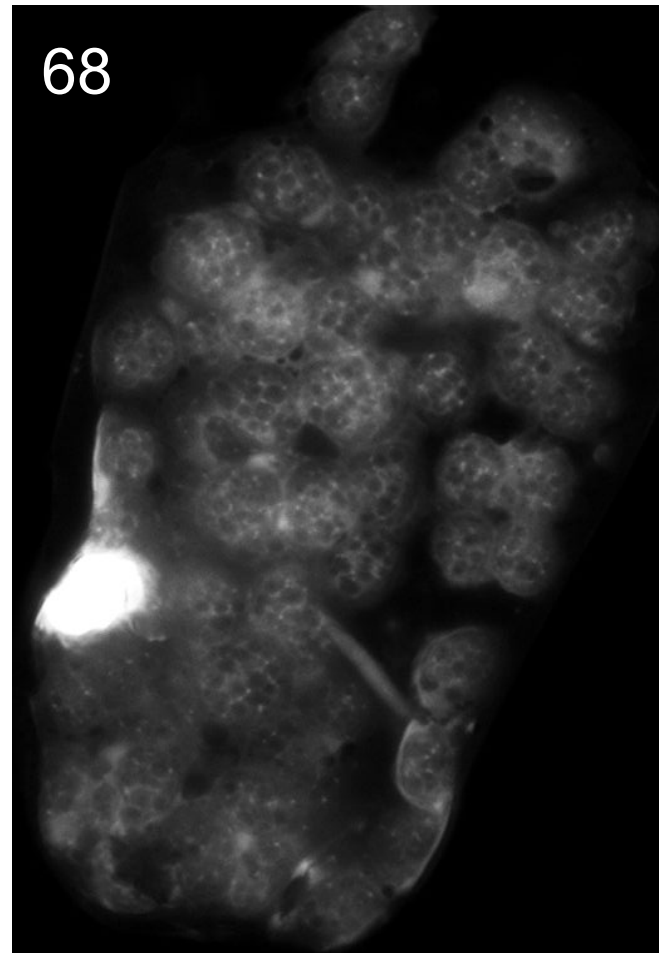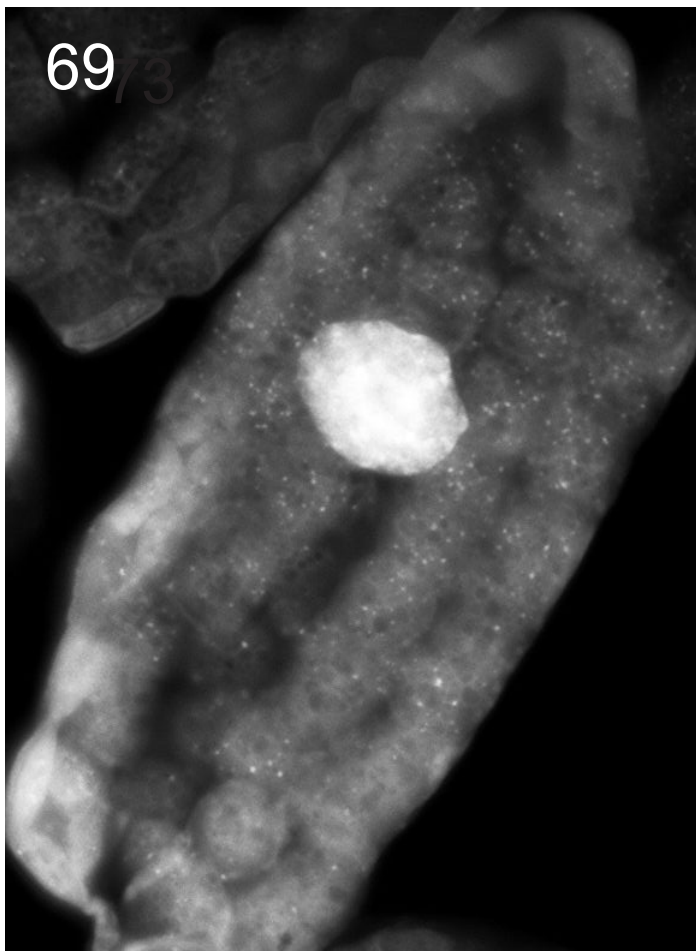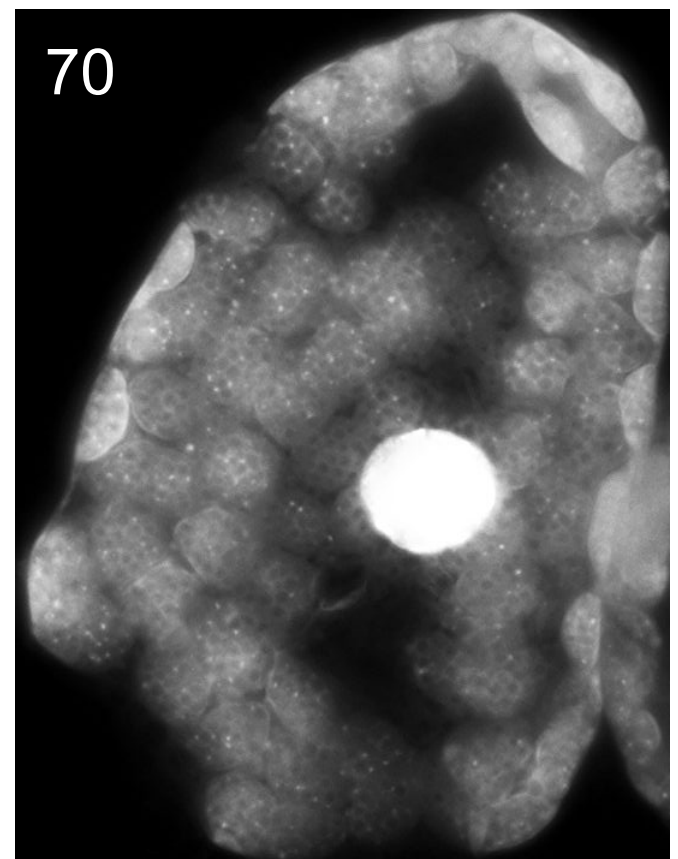

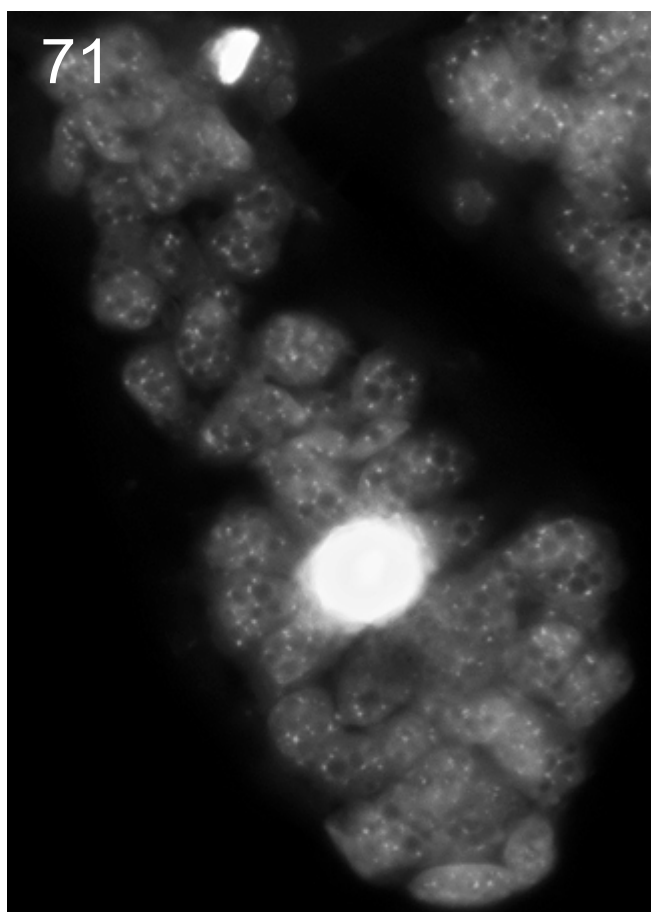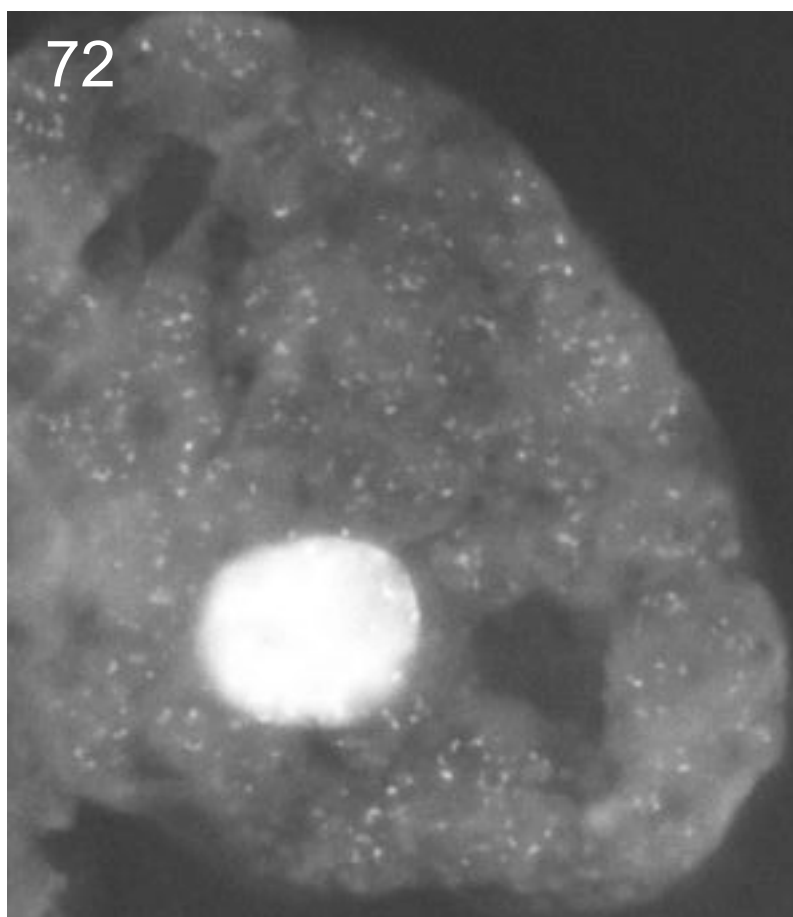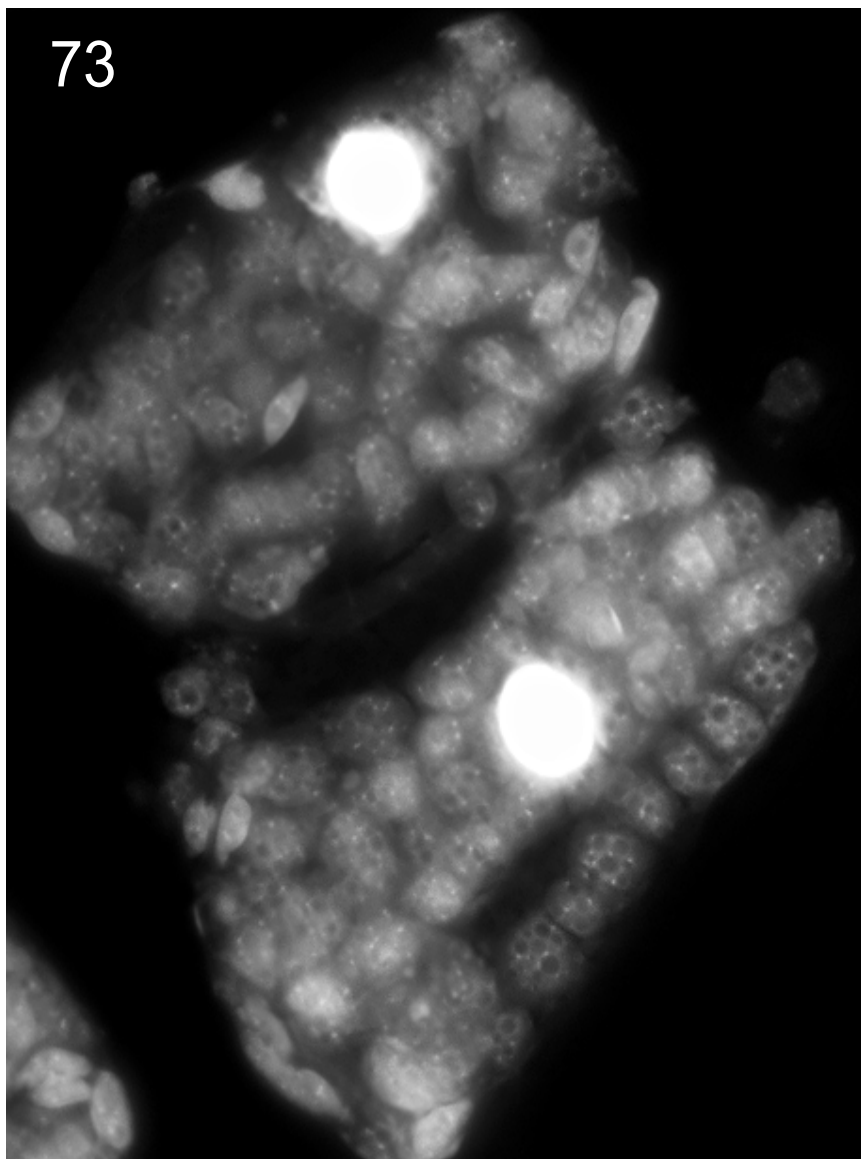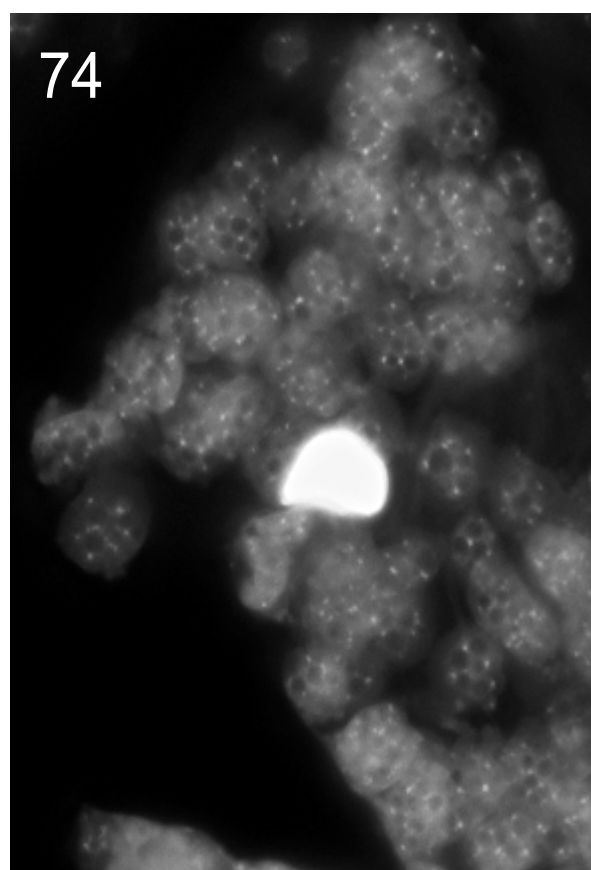

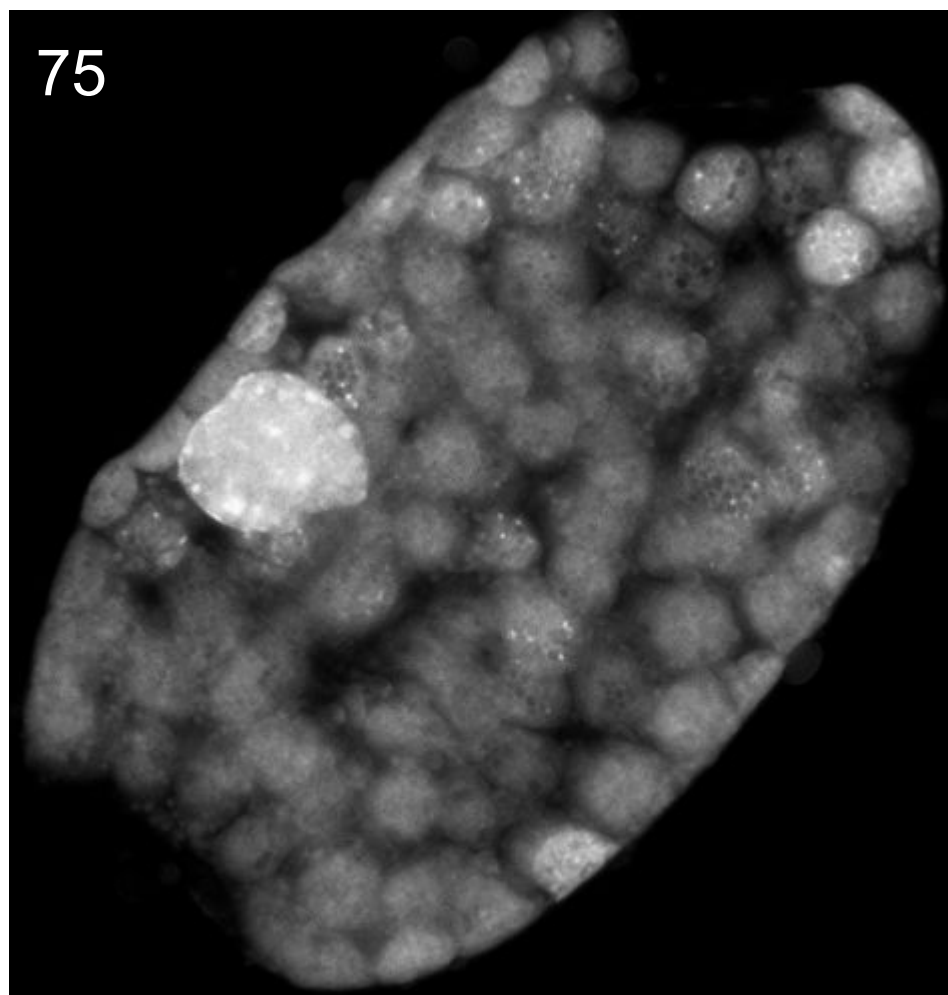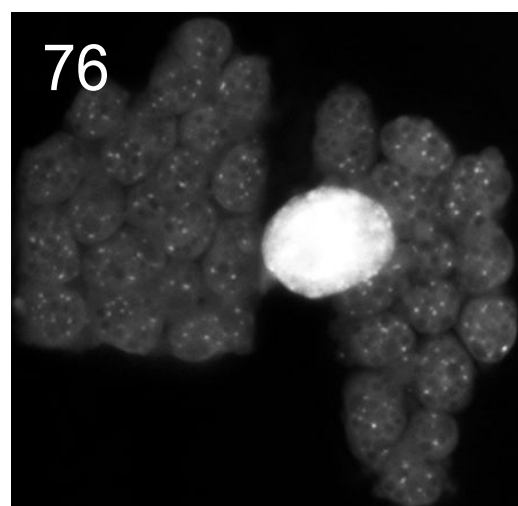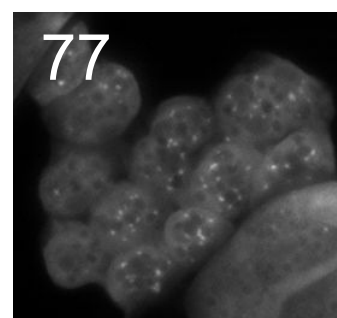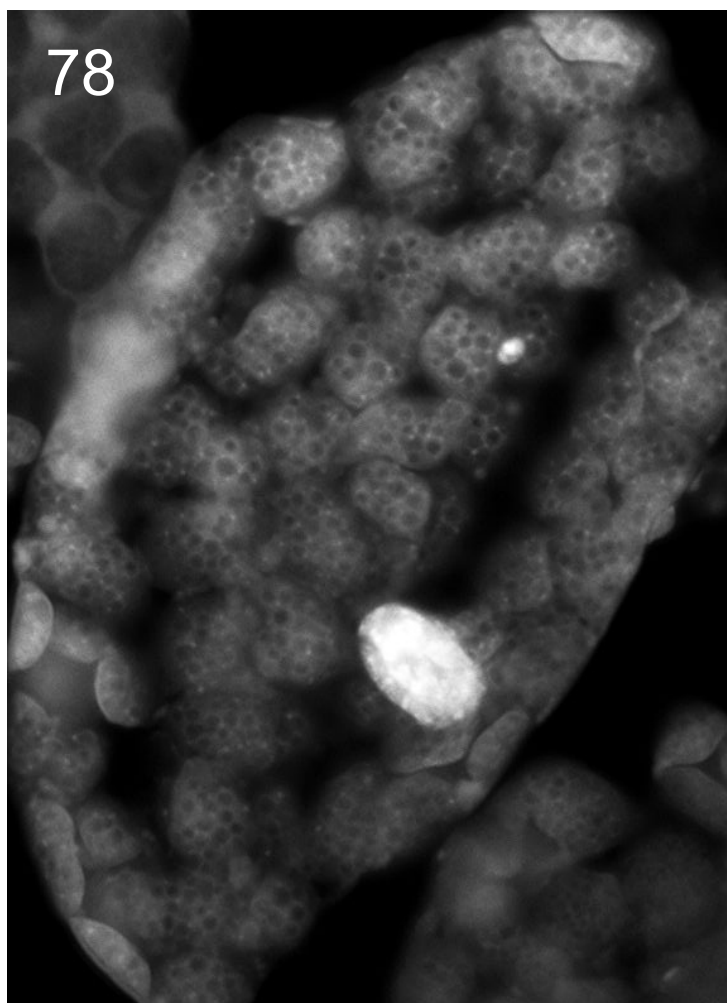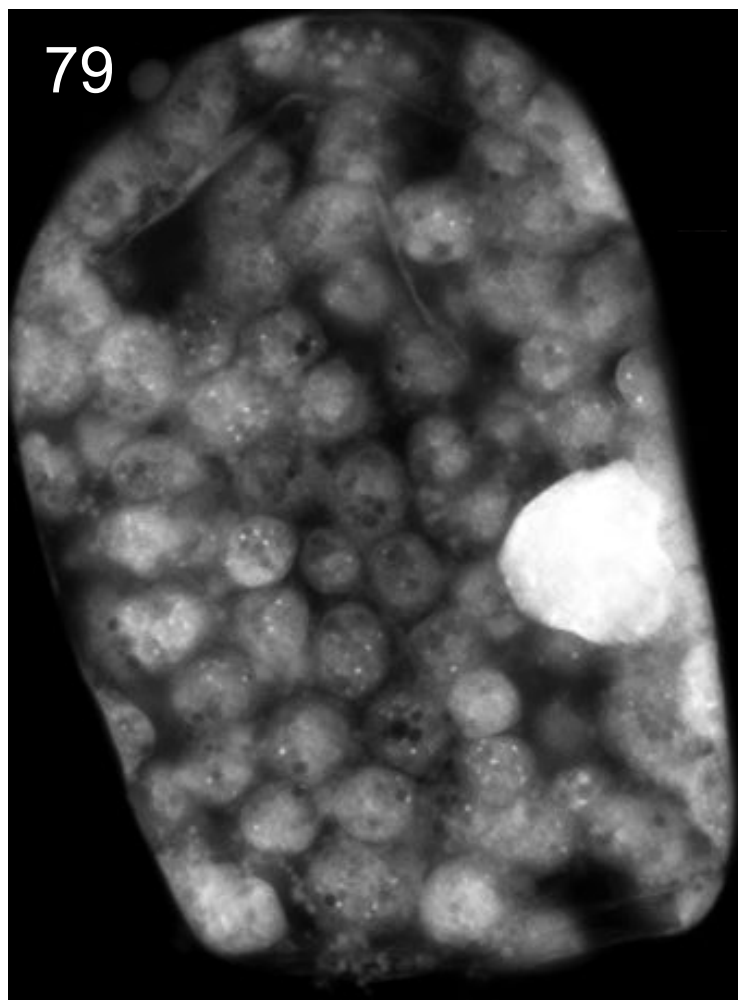

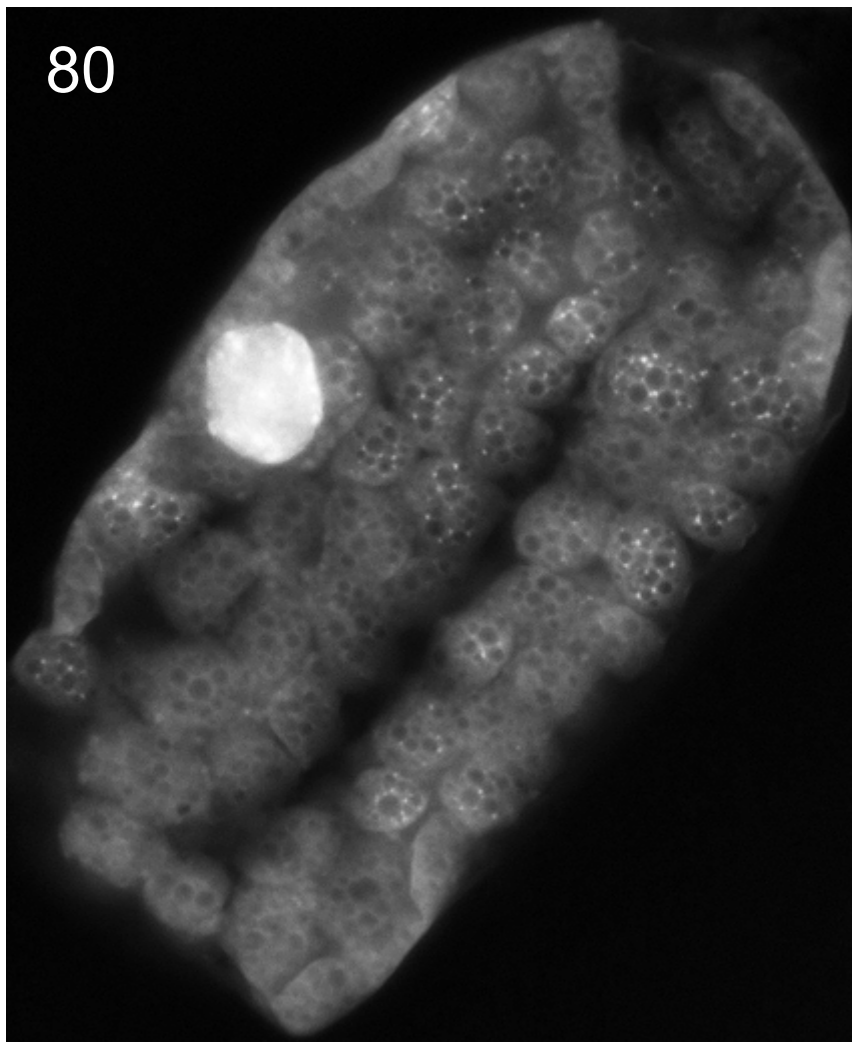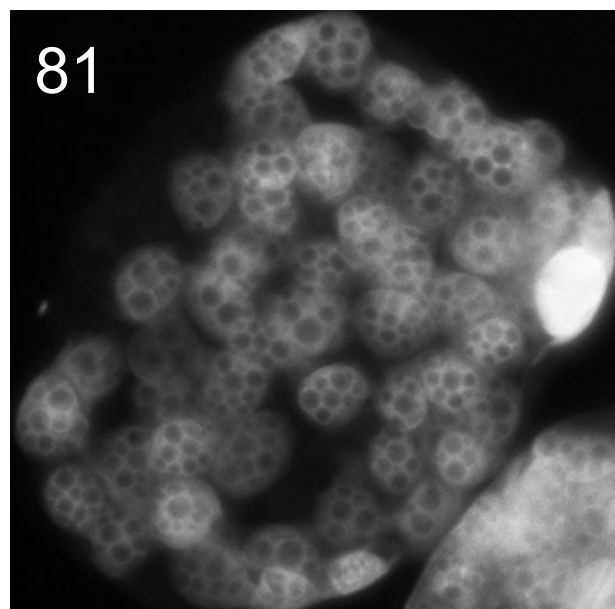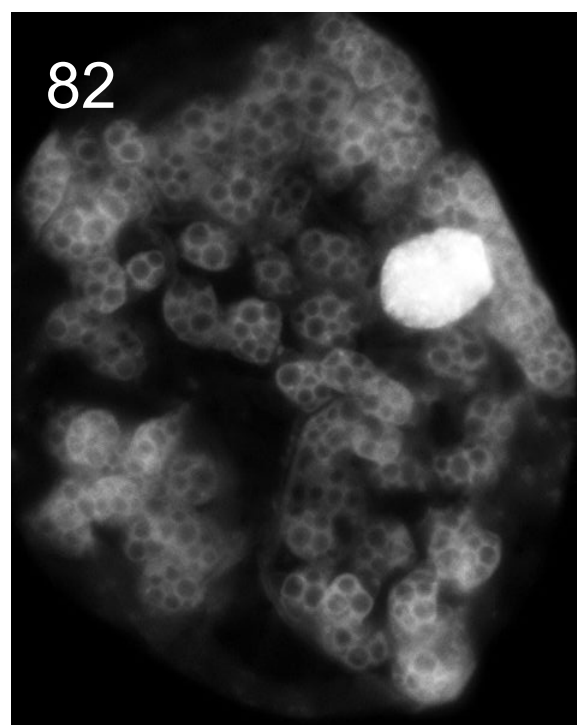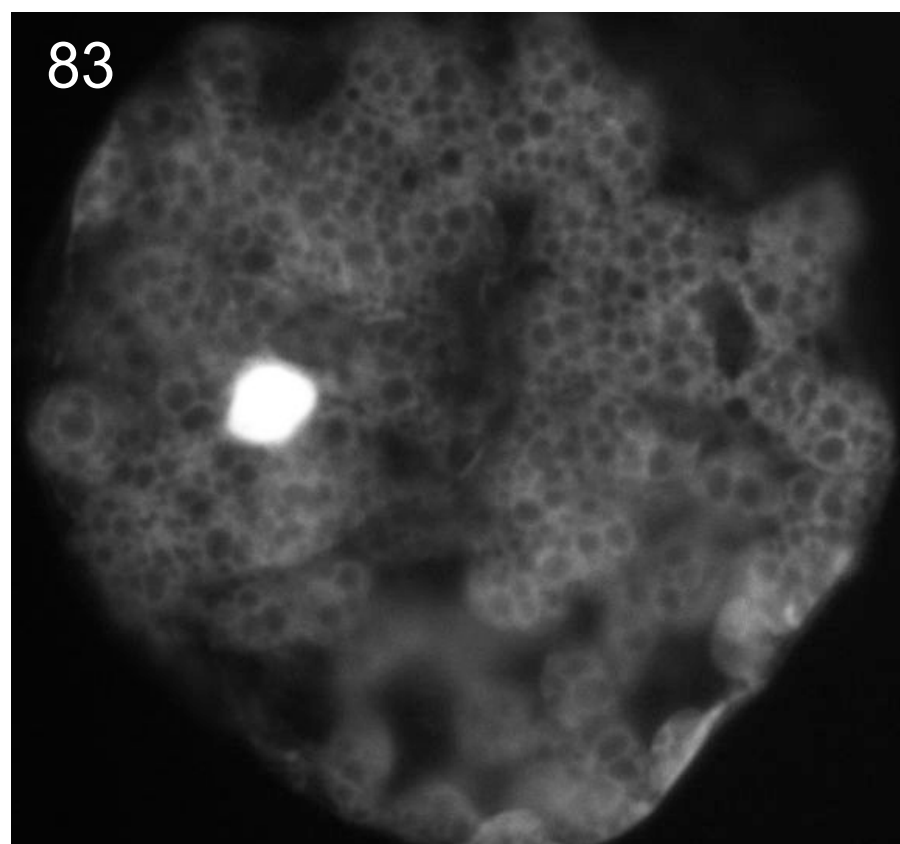

Supplement: supp_tpc.113.117465_tpc117465SupplementalDS1.pdf [file supp_tpc.113.117465_tpc117465SupplementalDS1.pdf]
