# Supplementary material
Source: PubMed Central journal article supplement (PMC4001396)

## *Arabidopsis thaliana*

Examples of DAPI stained mesophyll cells of leaf stages I and II

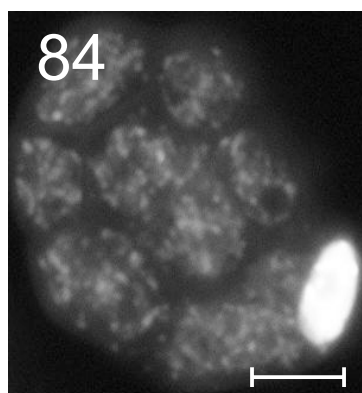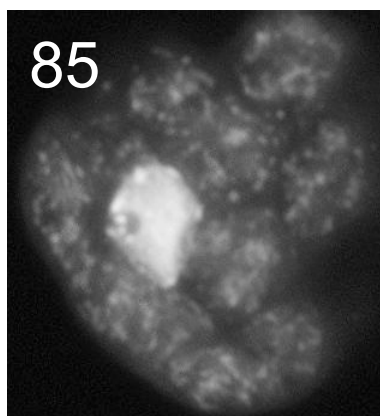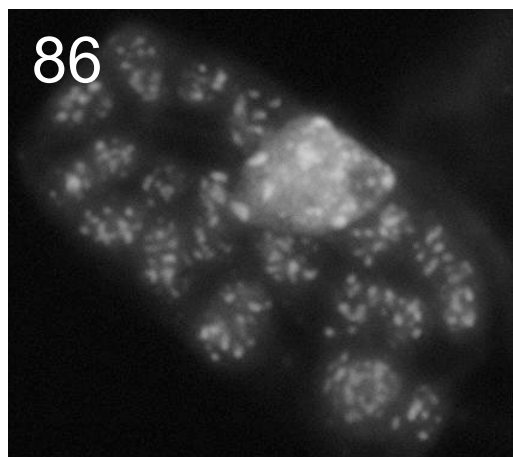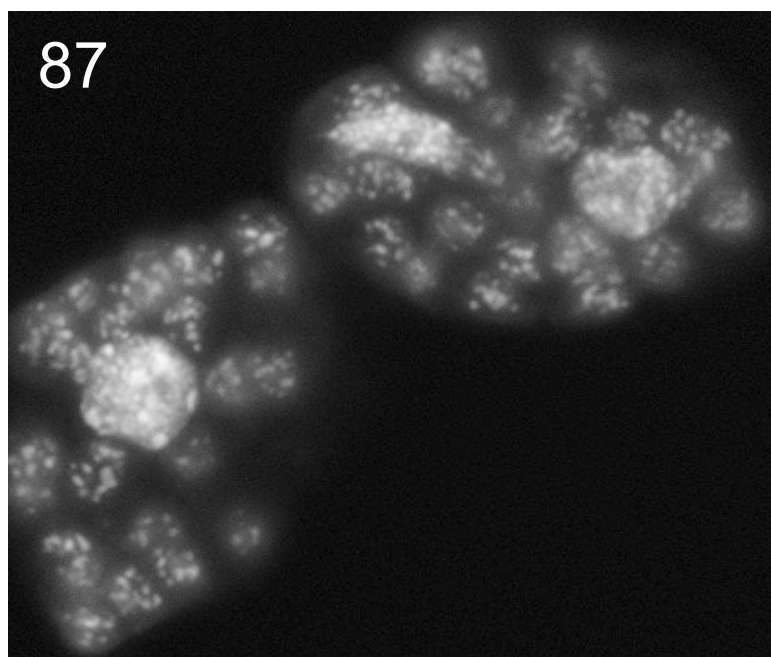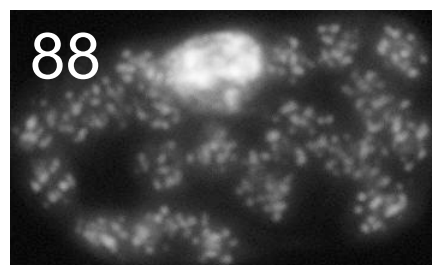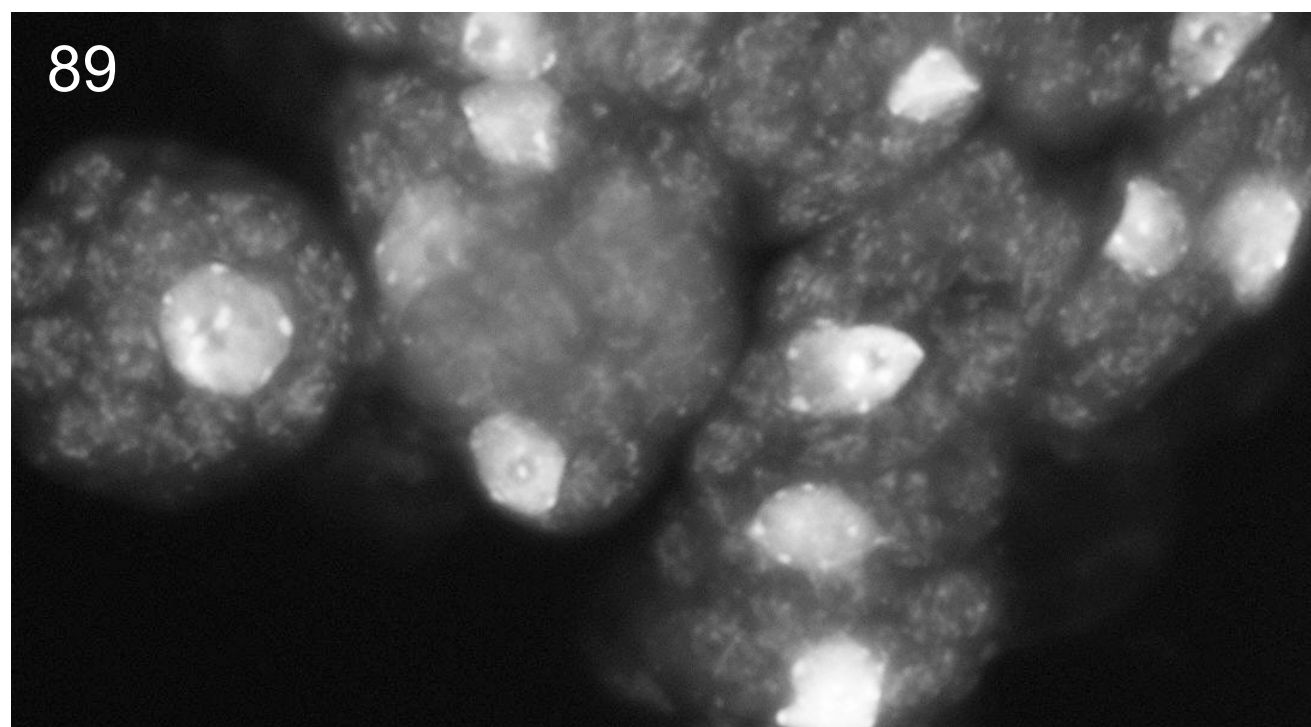

Bar: 5  $\mu$ m, in (84) also for (85 - 111)

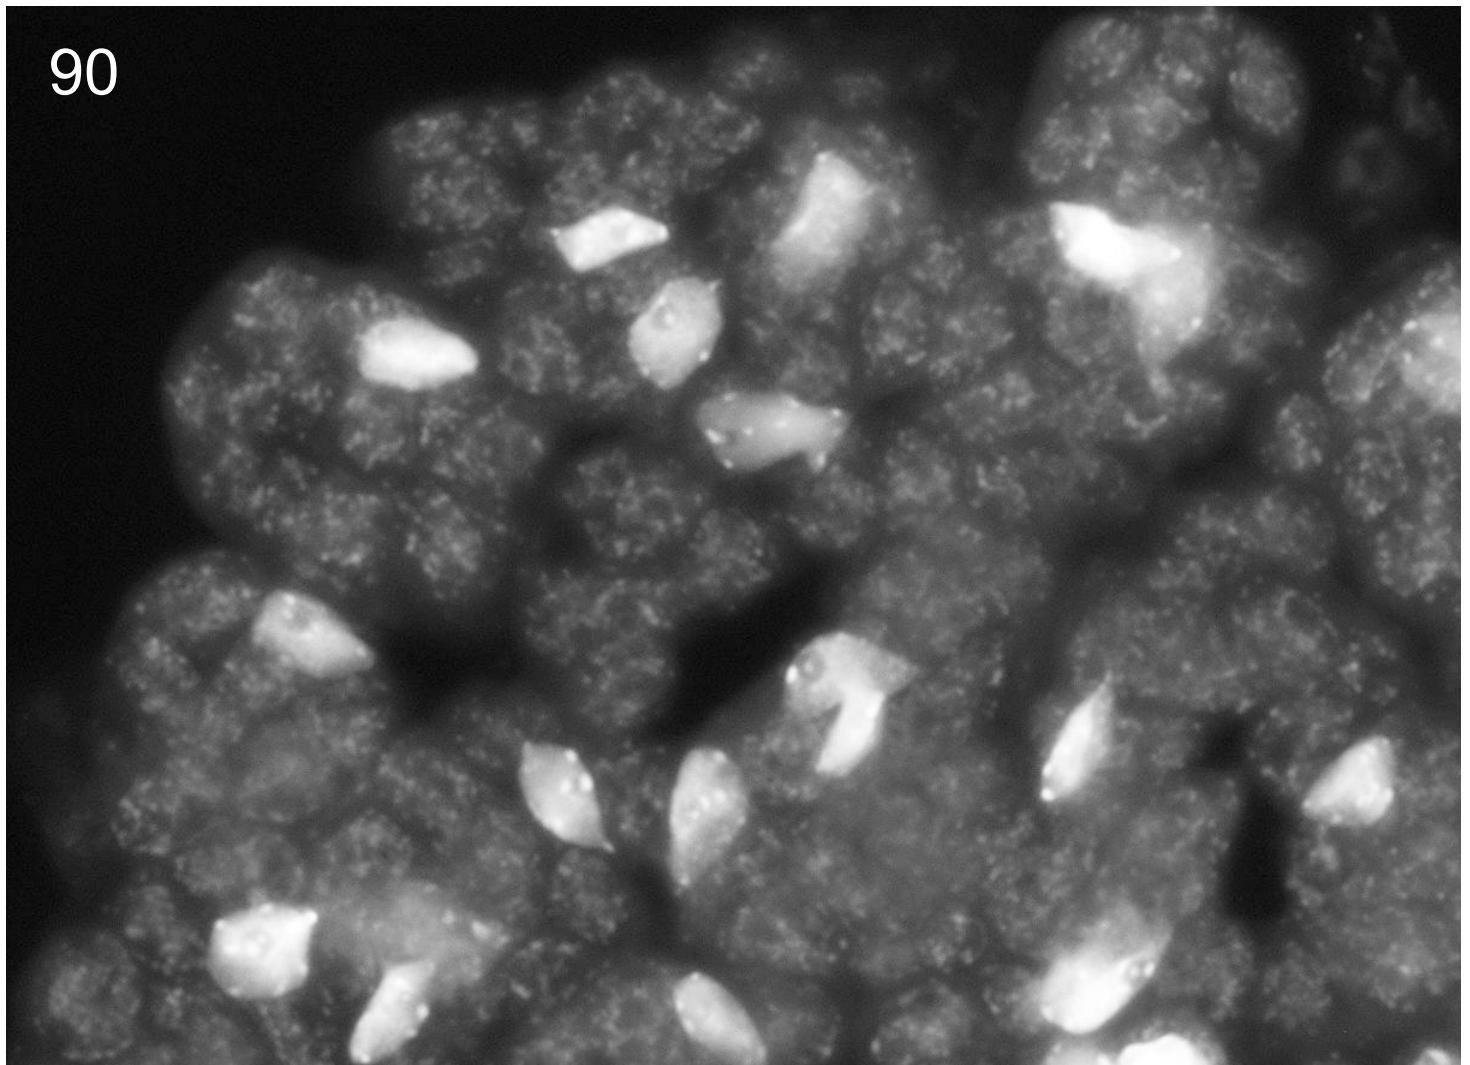

Examples of DAPI stained mesophyll cells of leaf stages III and IV

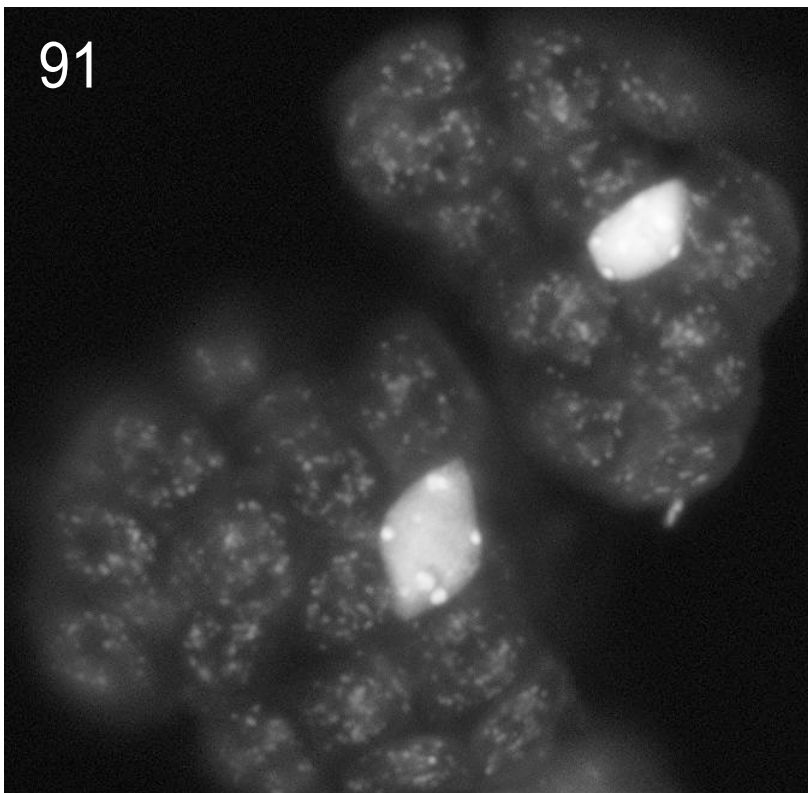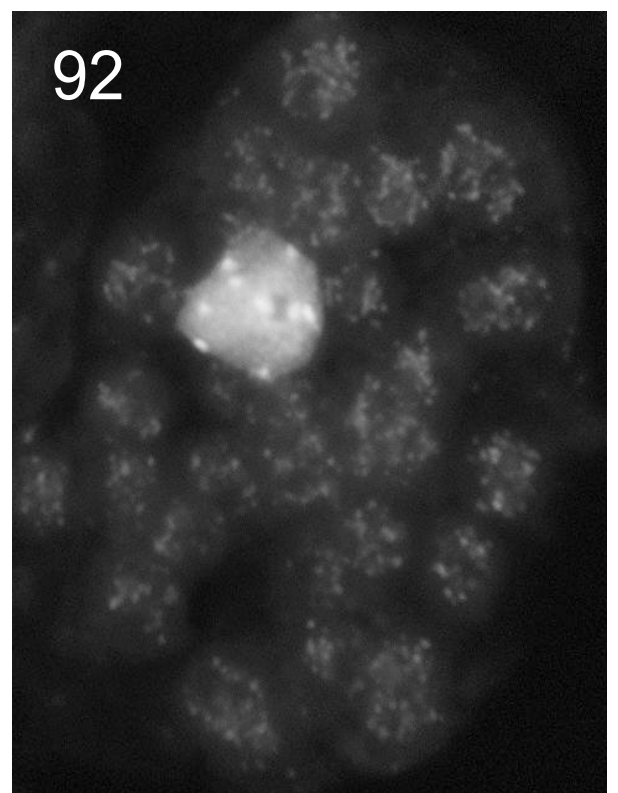

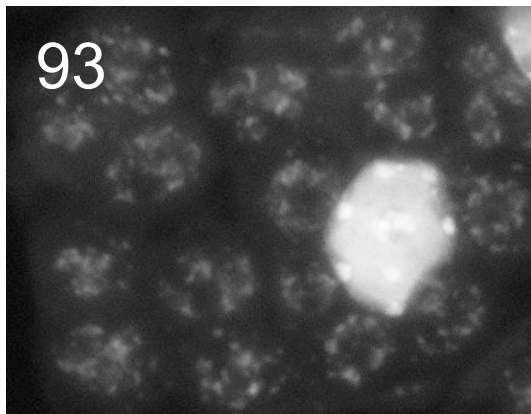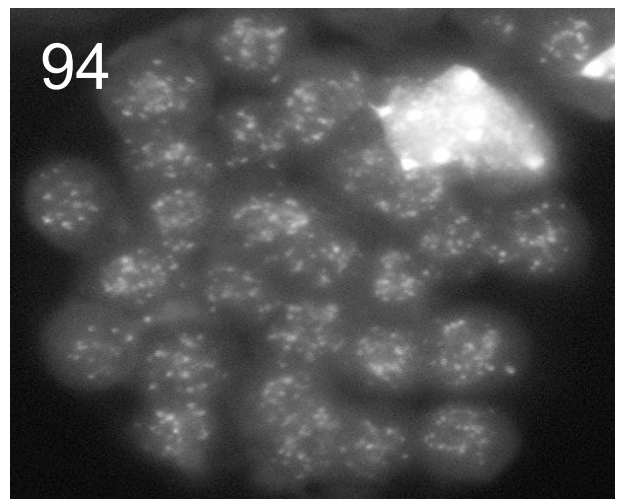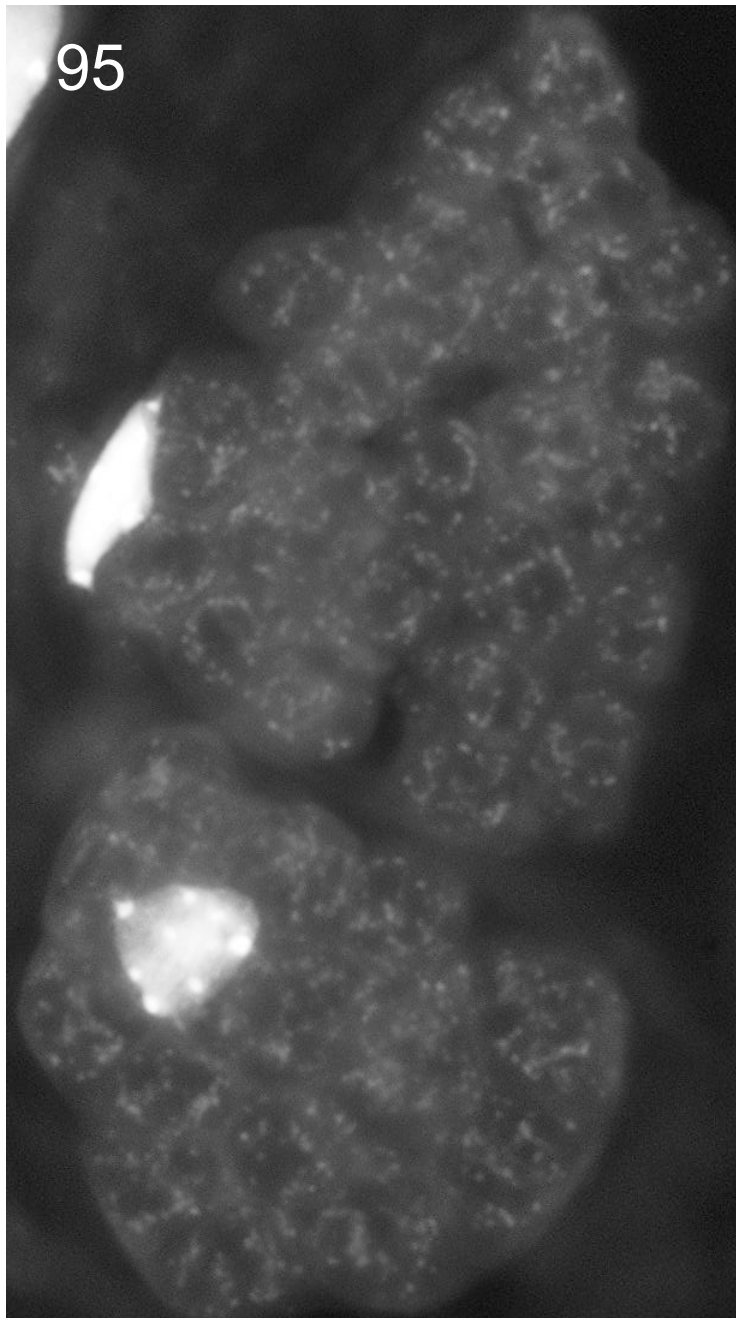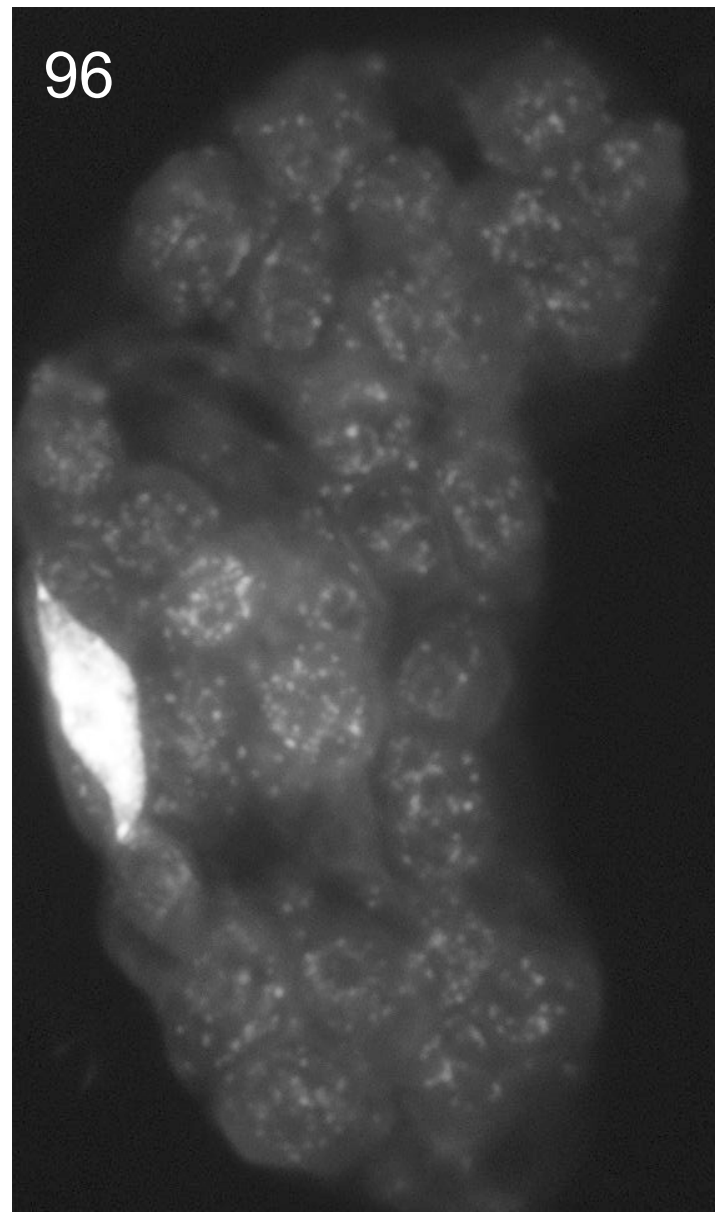

97

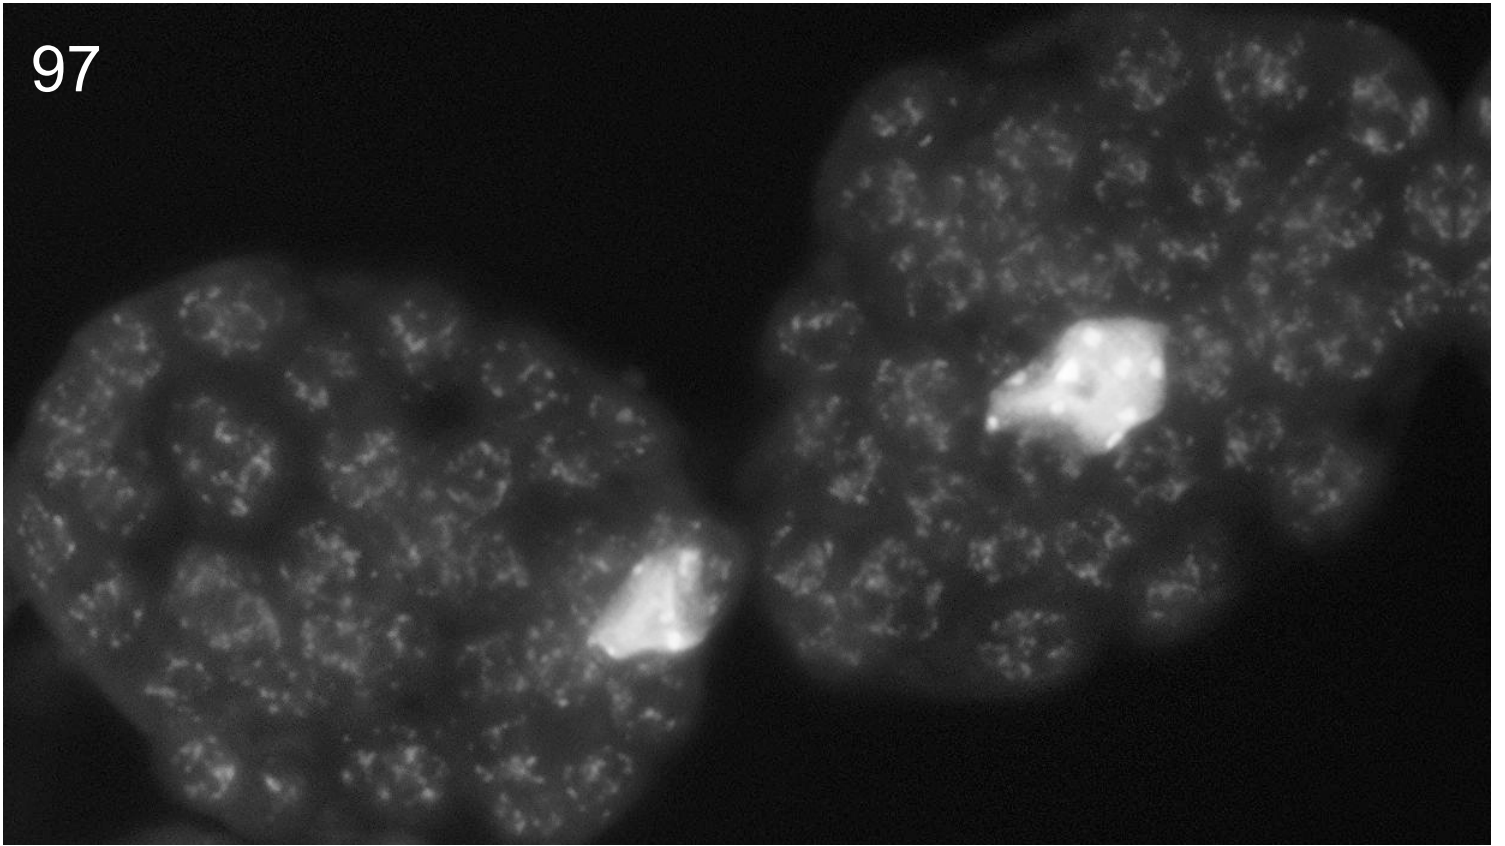

98

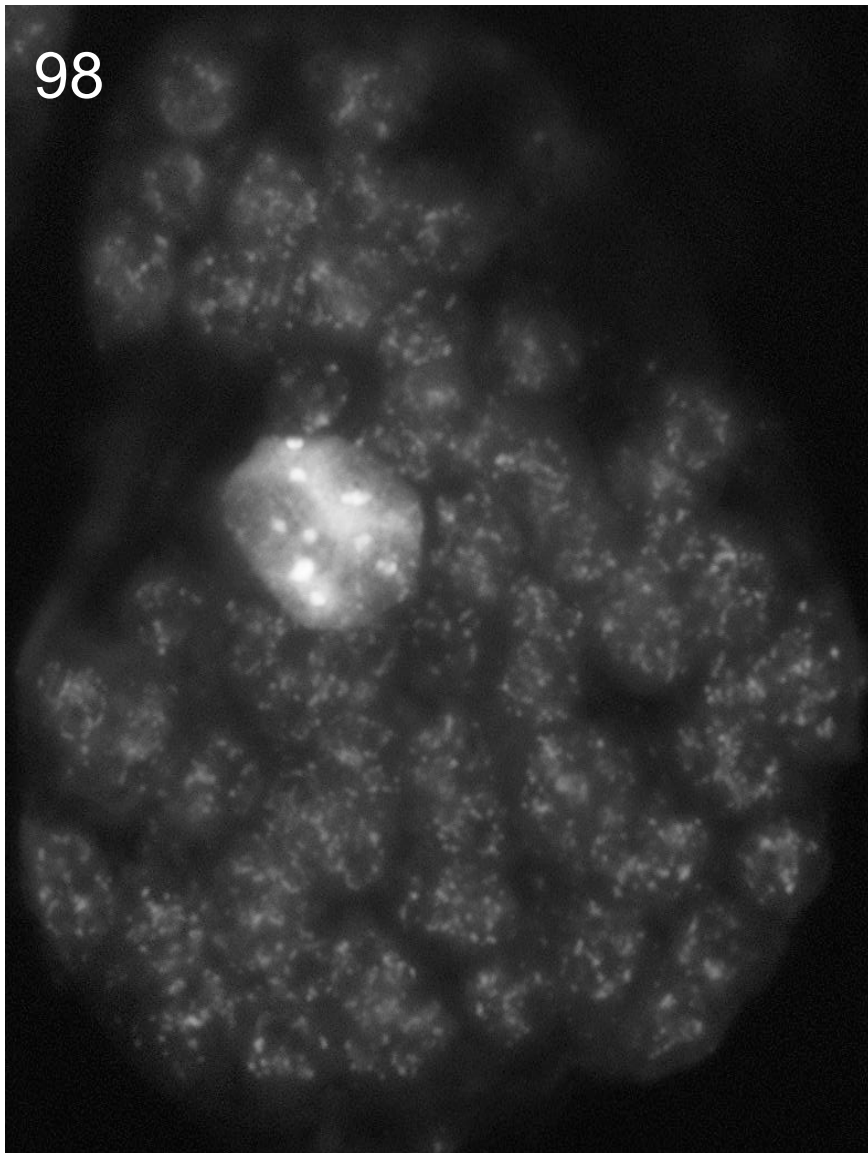

99

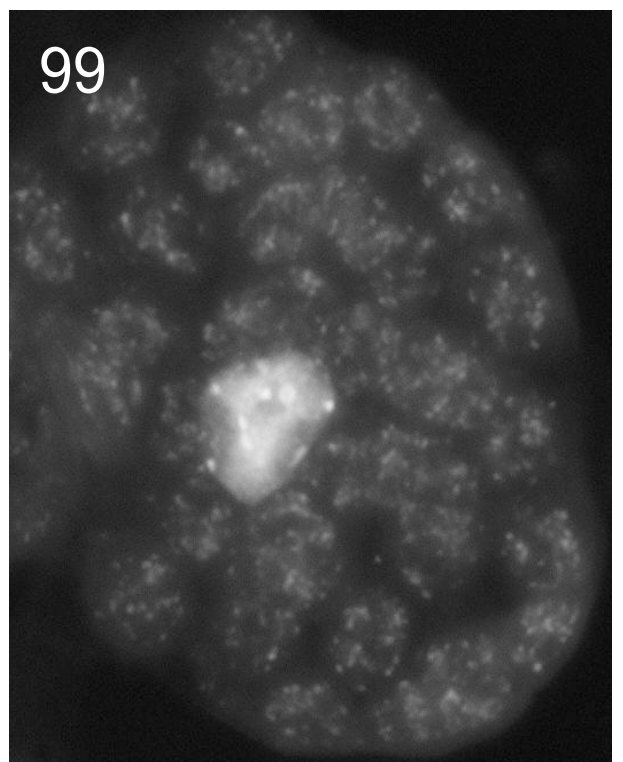

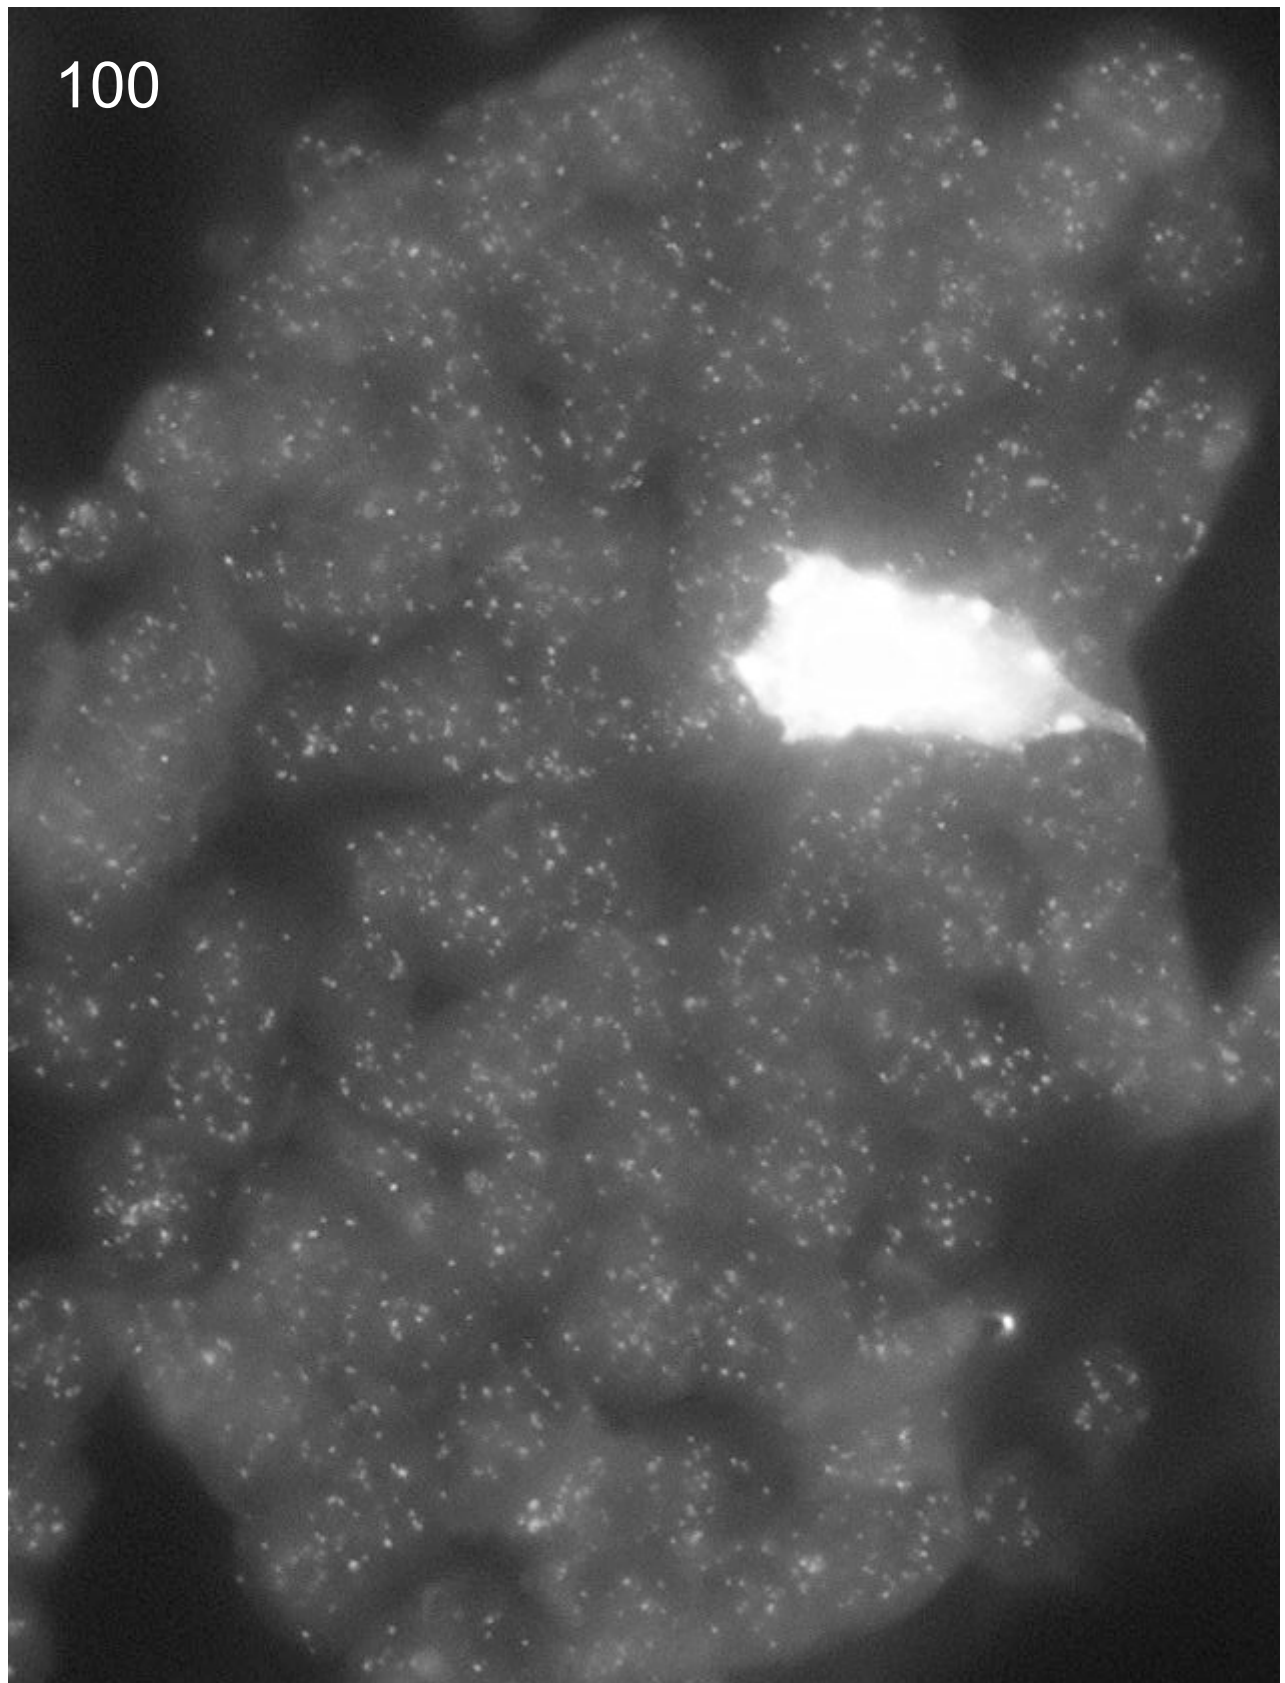

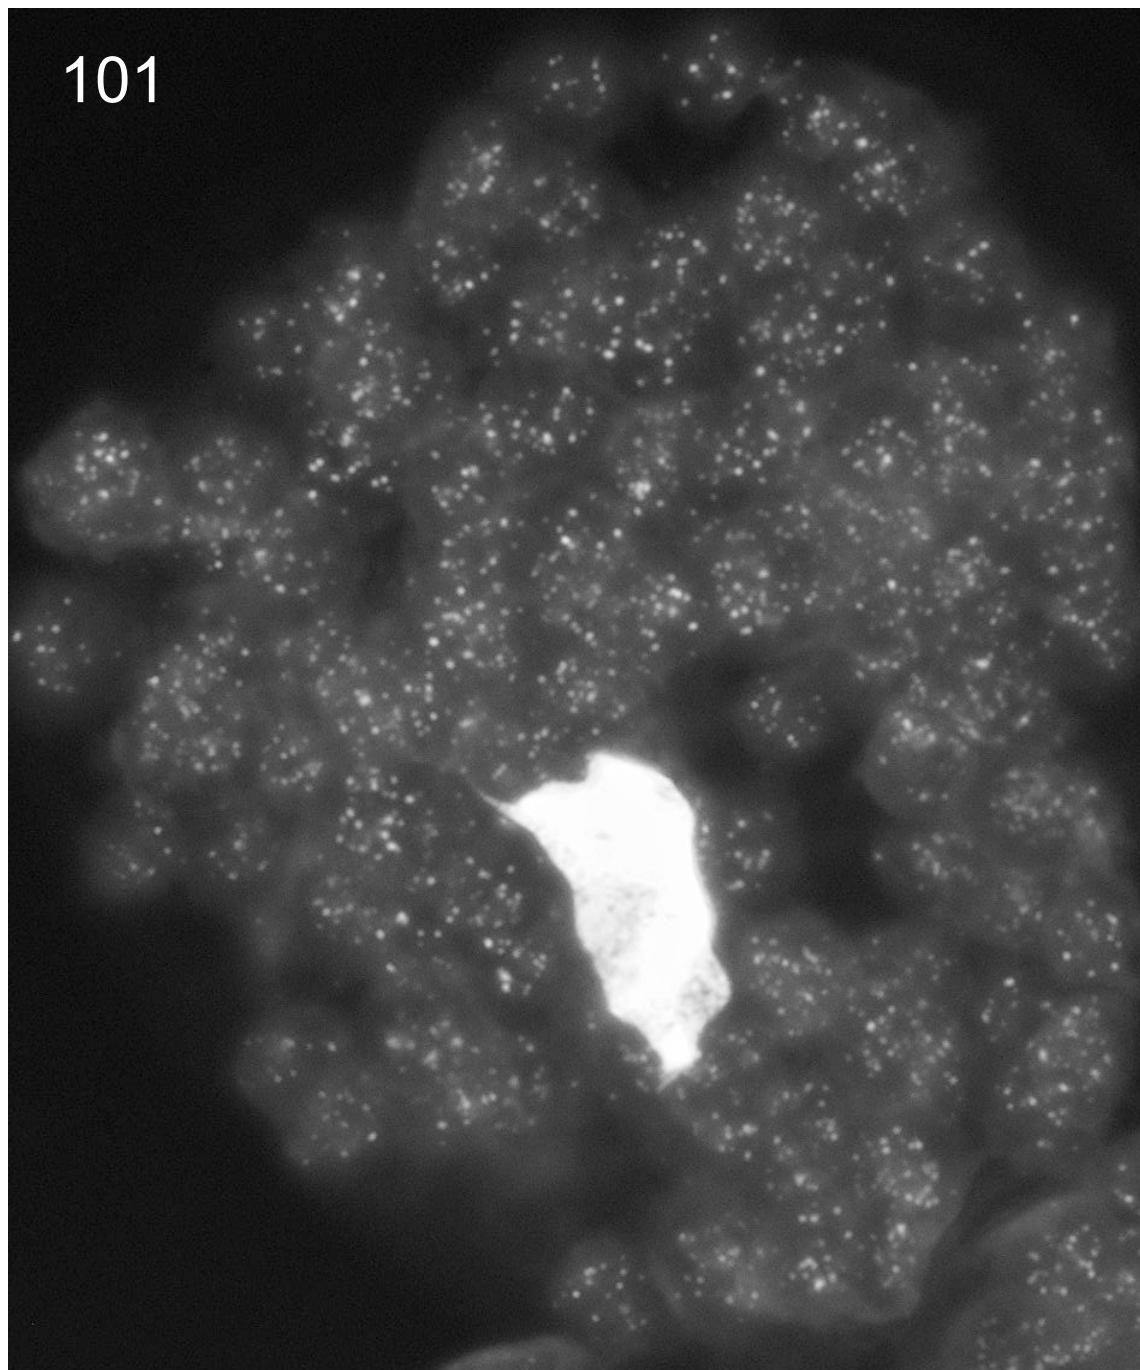

Examples of DAPI stained mesophyll cells of leaf stages V and VI

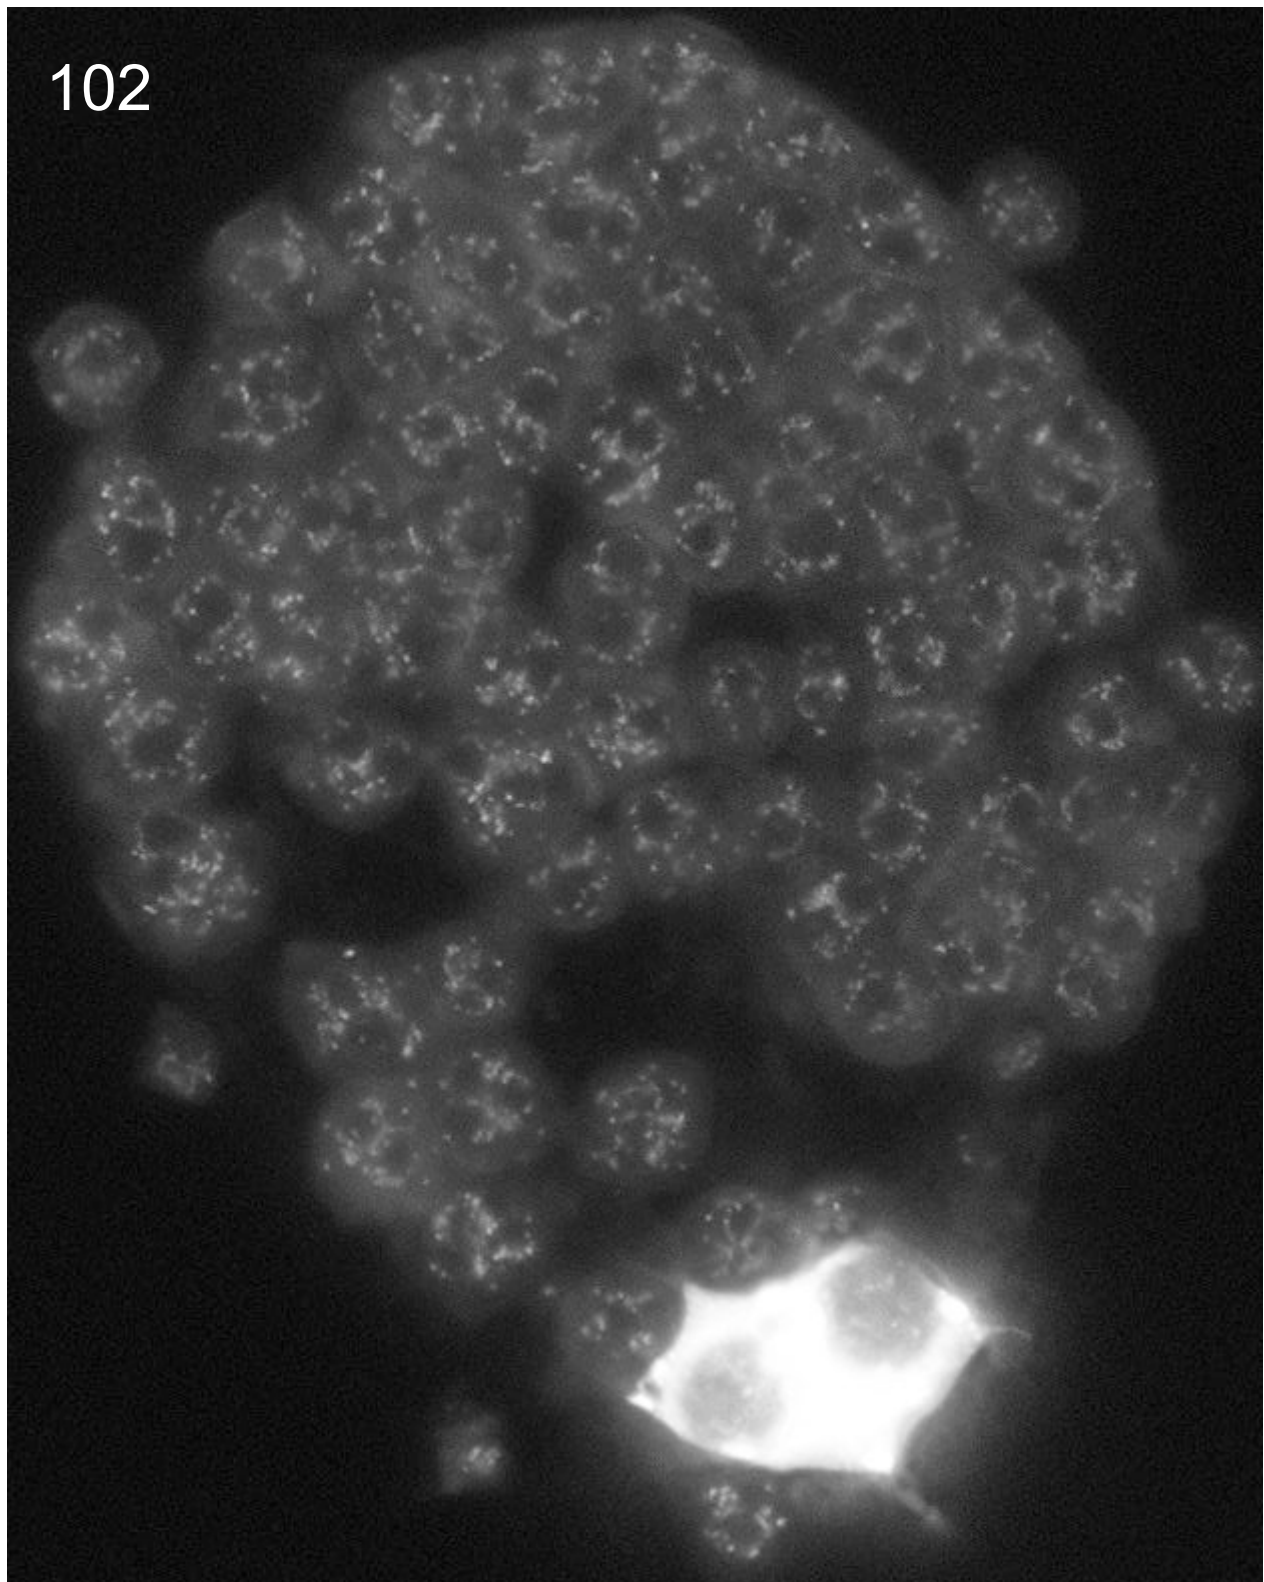

103

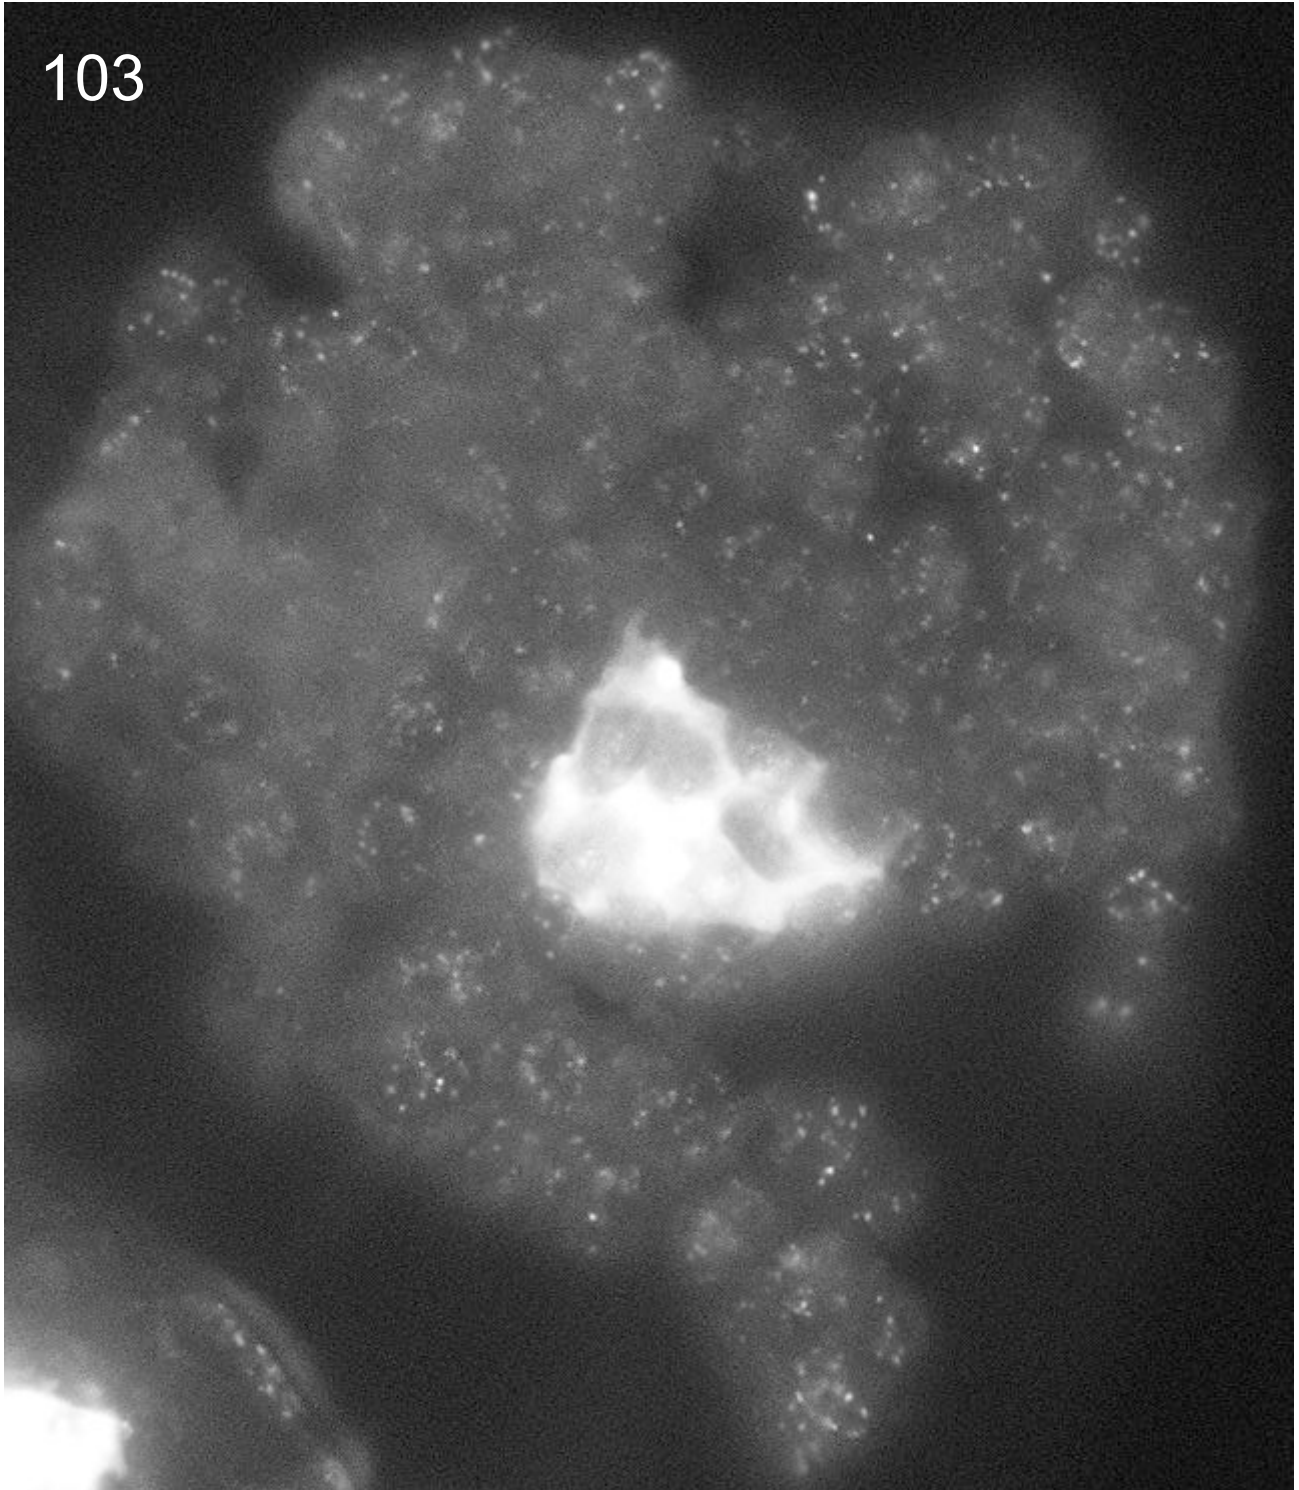



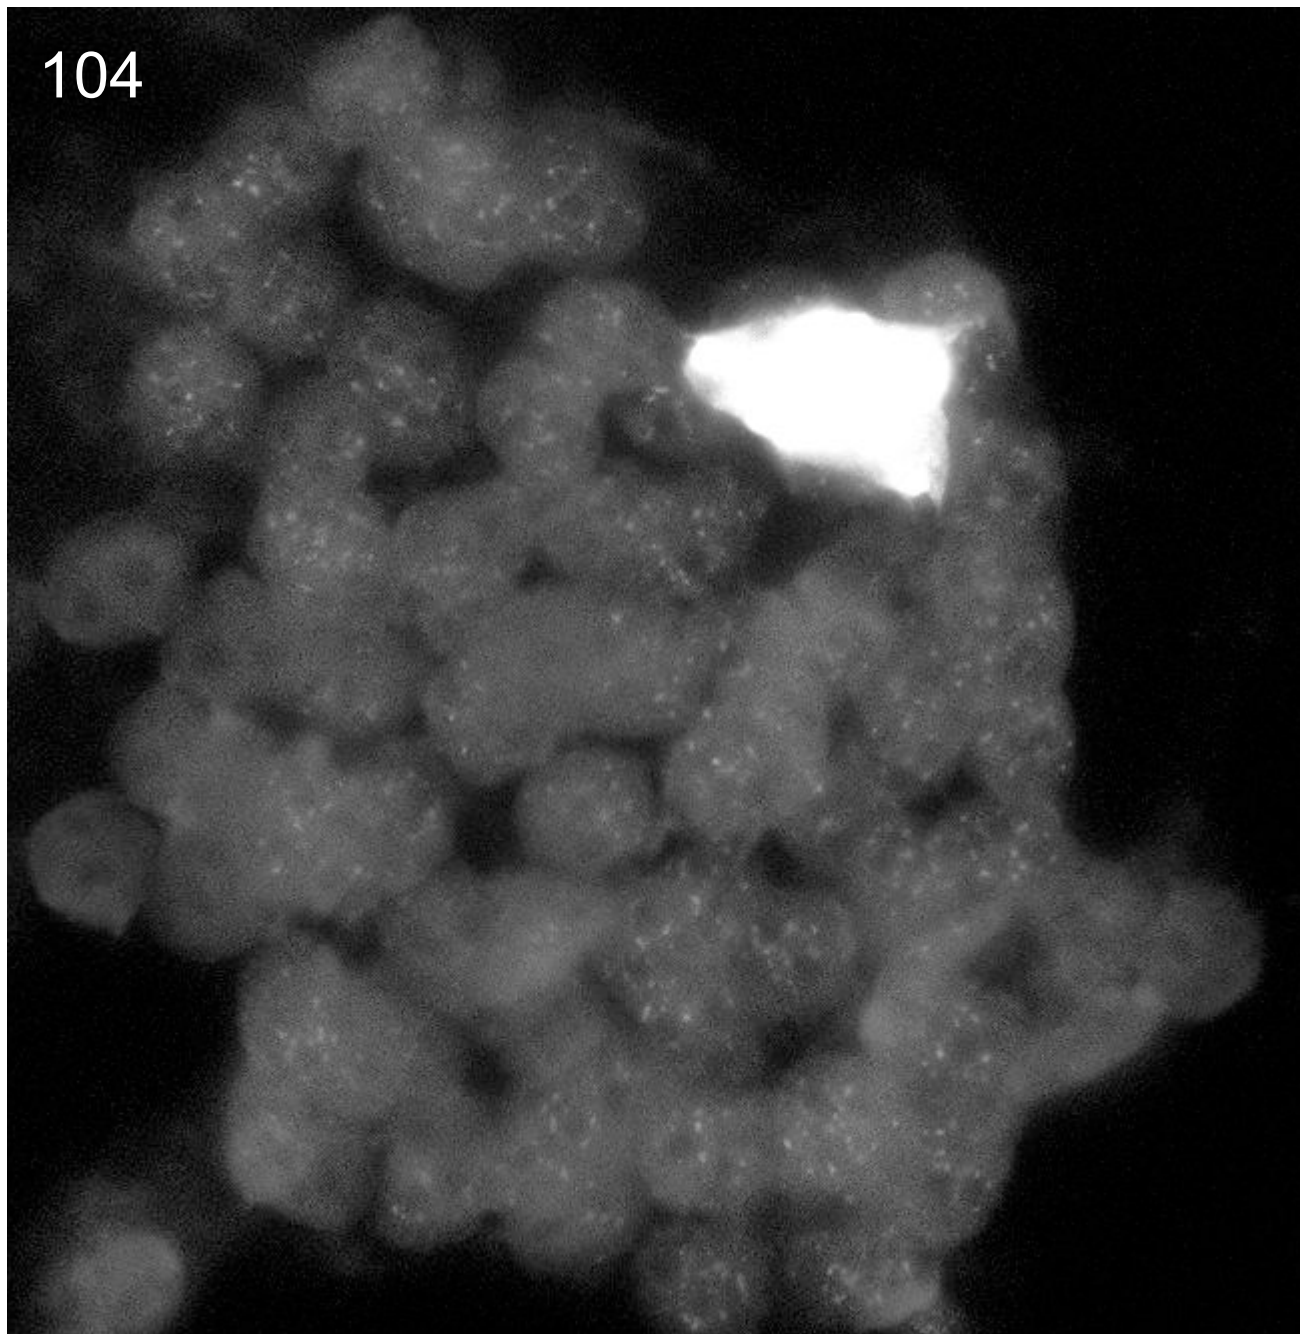

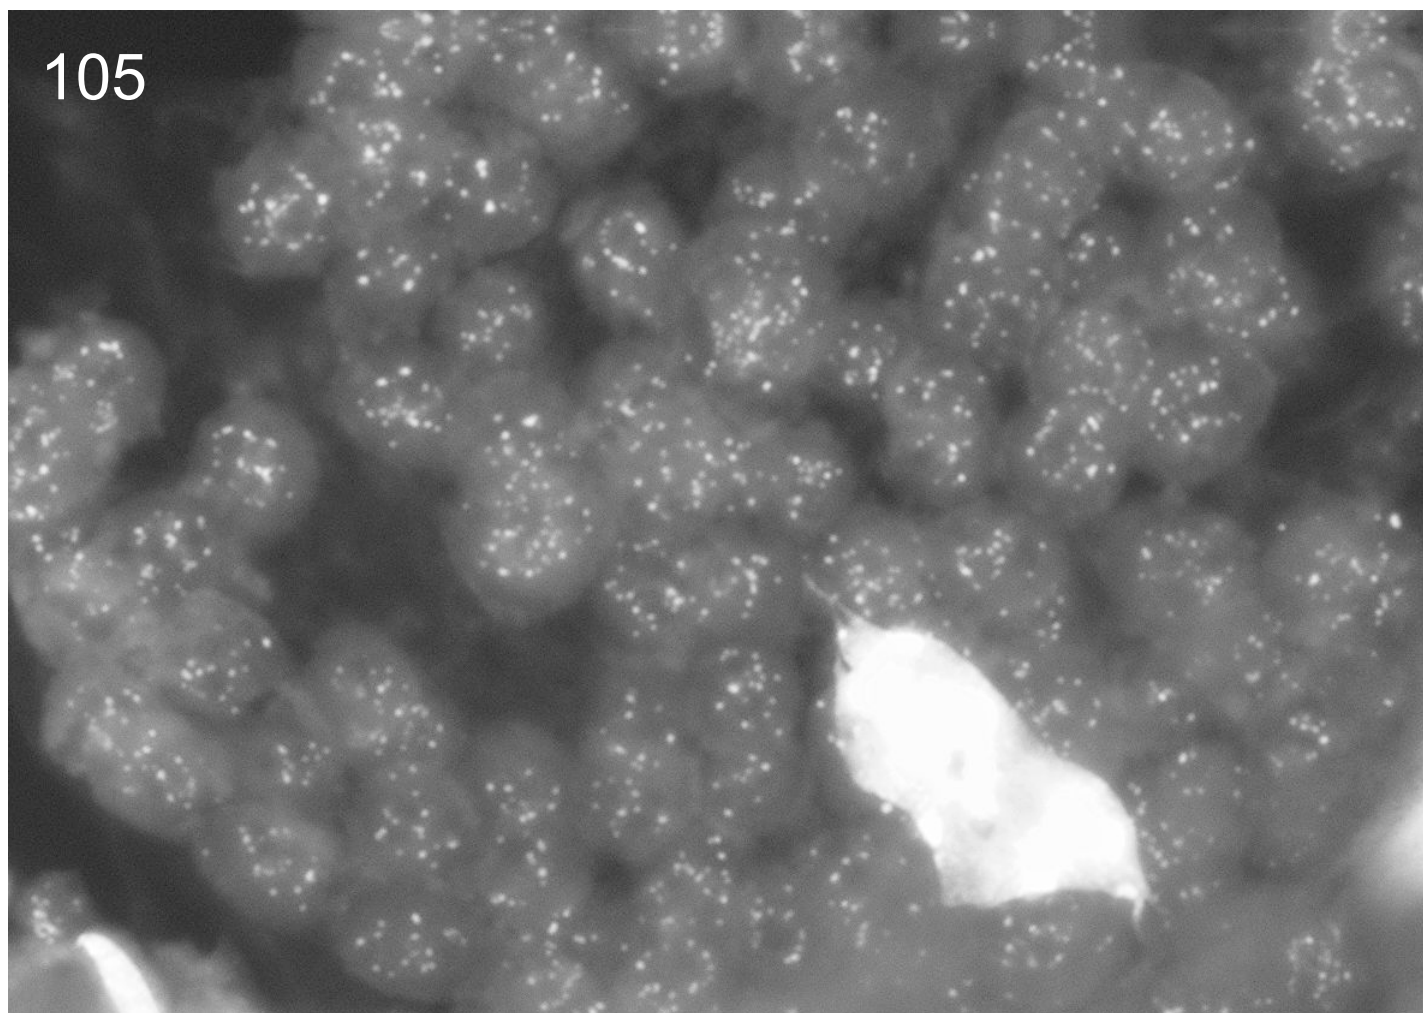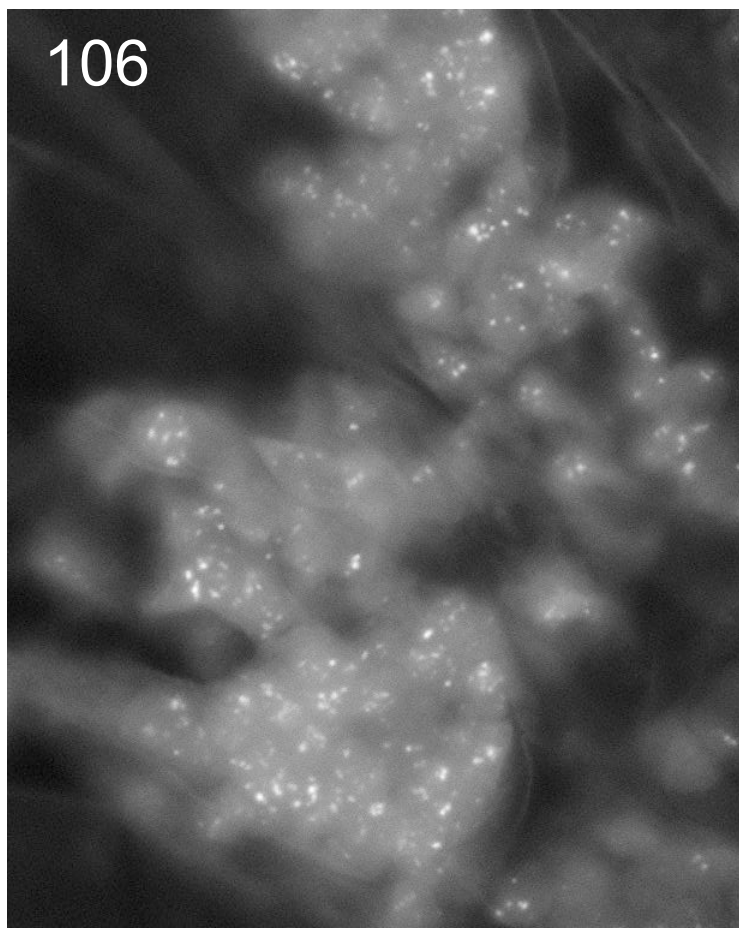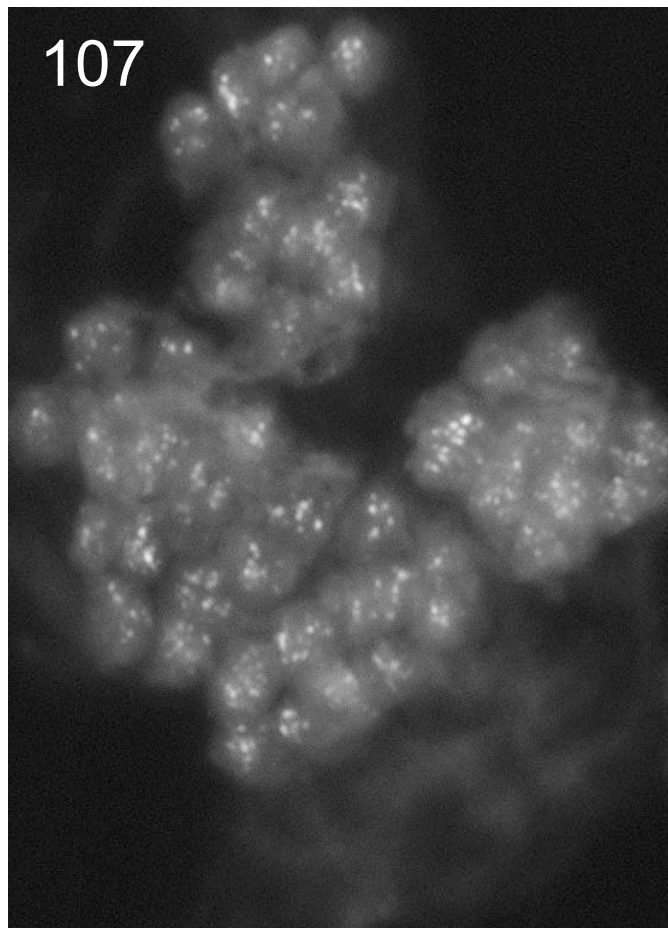

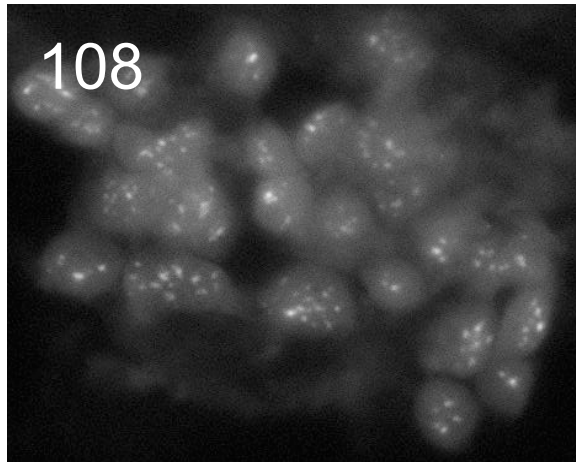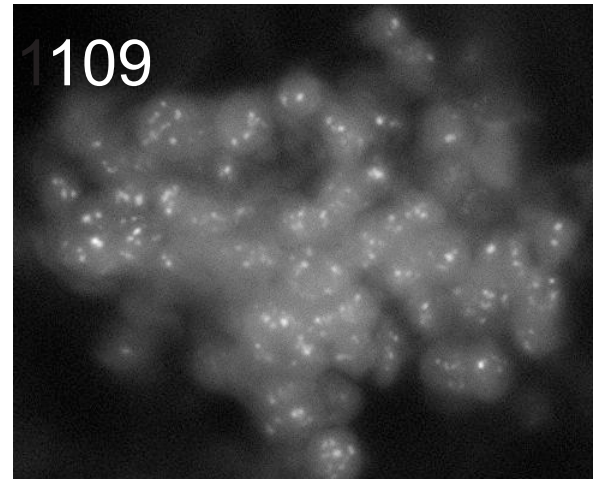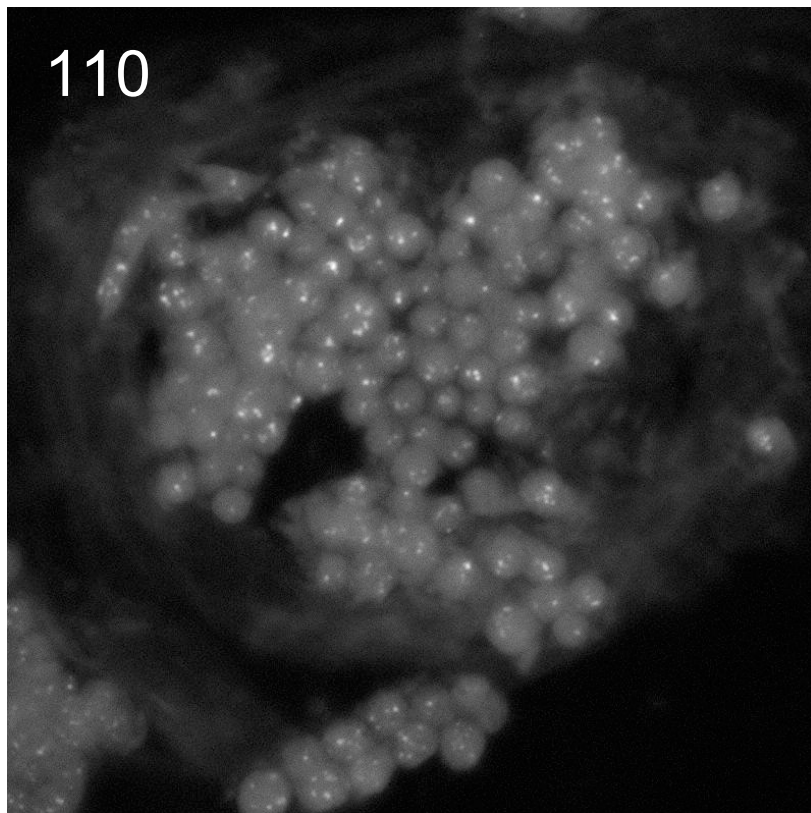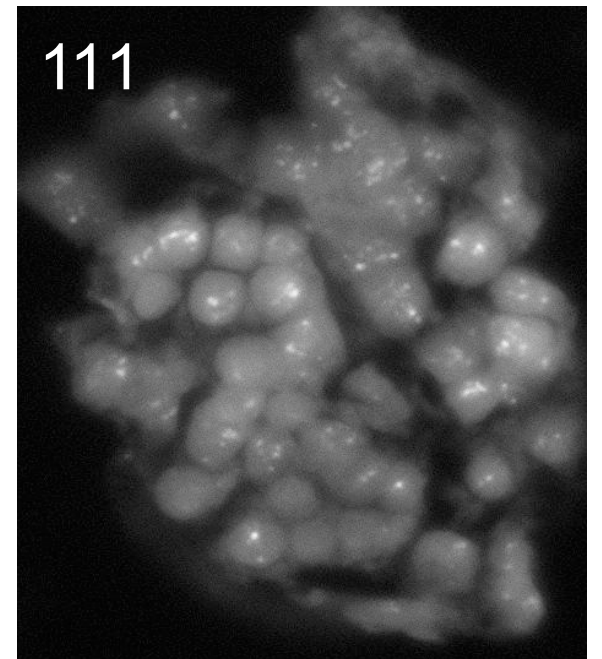

Supplement: supp_tpc.113.117465_tpc117465SupplementalDS2.pdf [file supp_tpc.113.117465_tpc117465SupplementalDS2.pdf]
