# Supplementary material
Source: PubMed Central journal article supplement (PMC4001396)

## Tabacco (*Nicotiana tabacum*)

Examples of DAPI stained mesophyll cells of leaf stages I and II

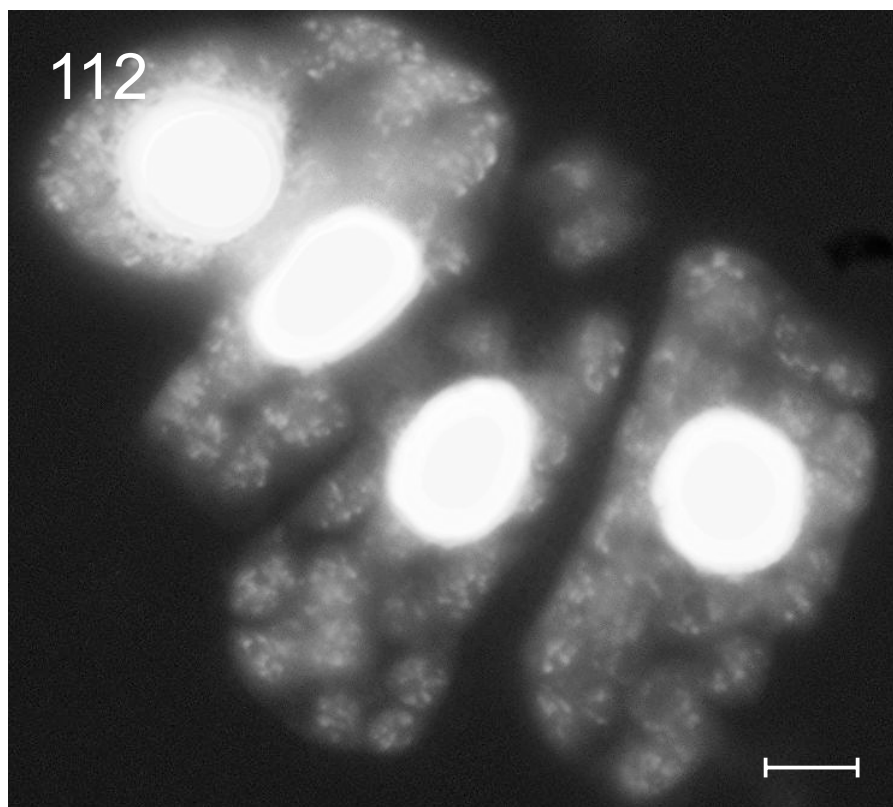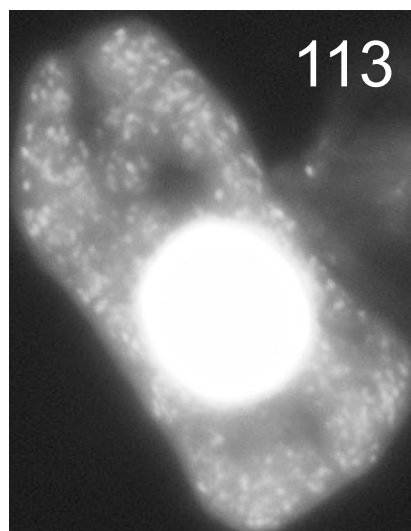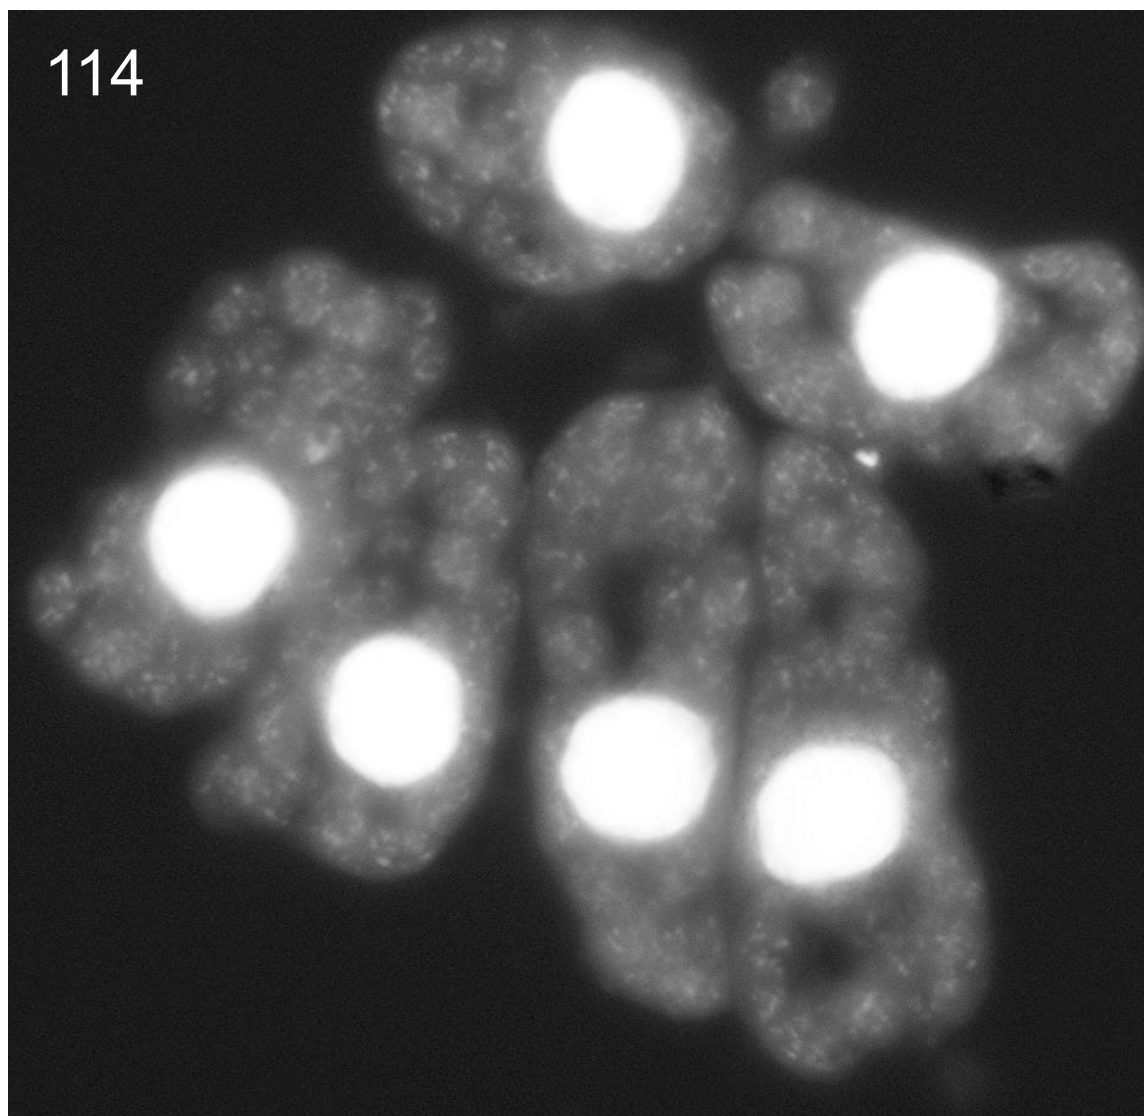

Bar: 5  $\mu$ m, in (112) also for (113 - 122)

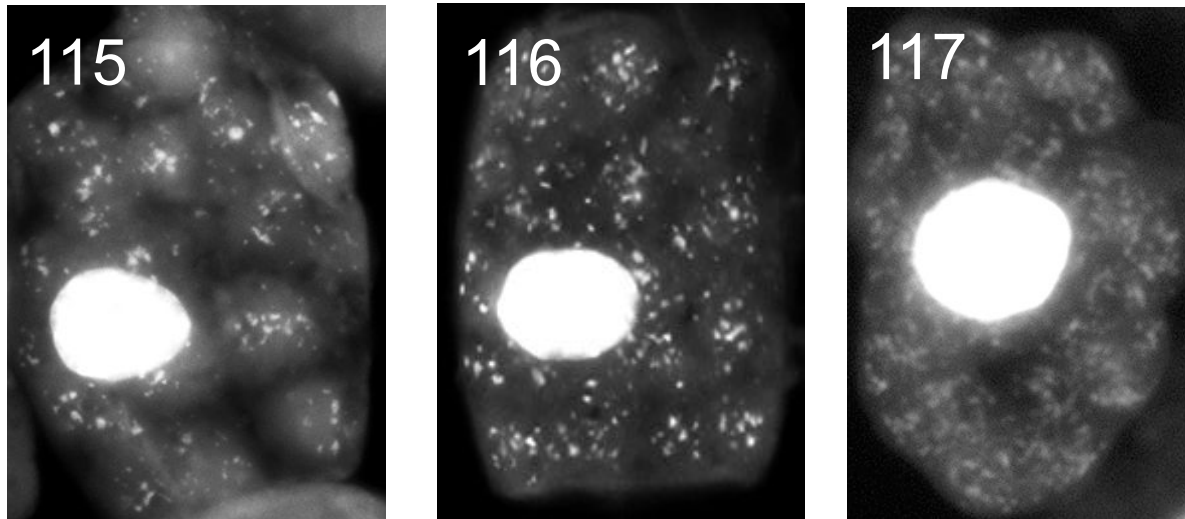

Examples of DAPI stained mesophyll cells of leaf stages III and IV

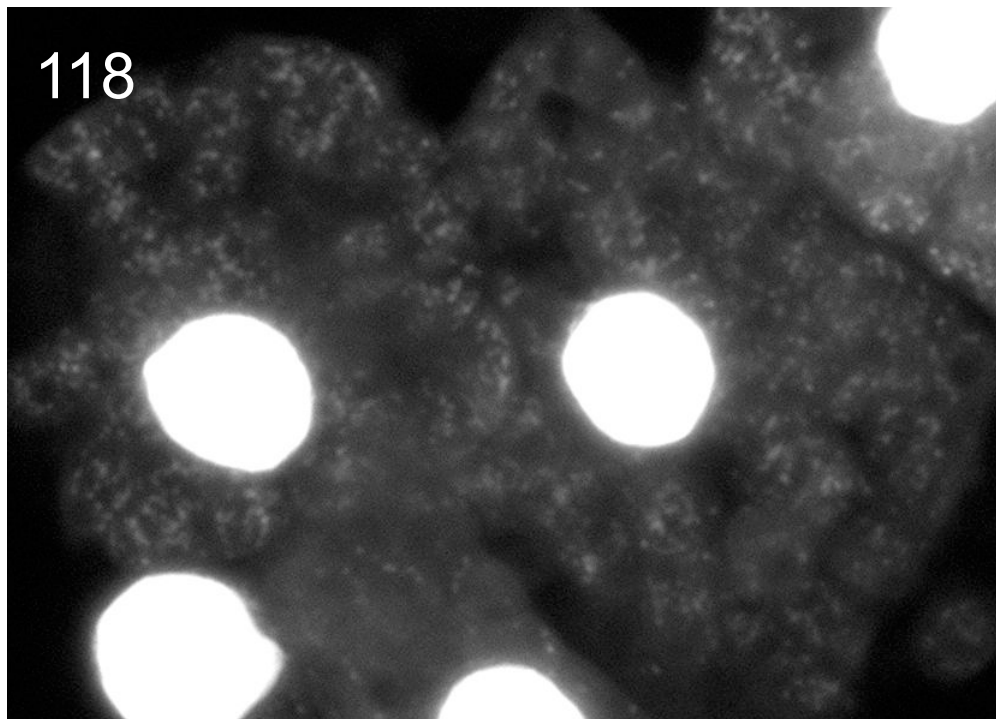

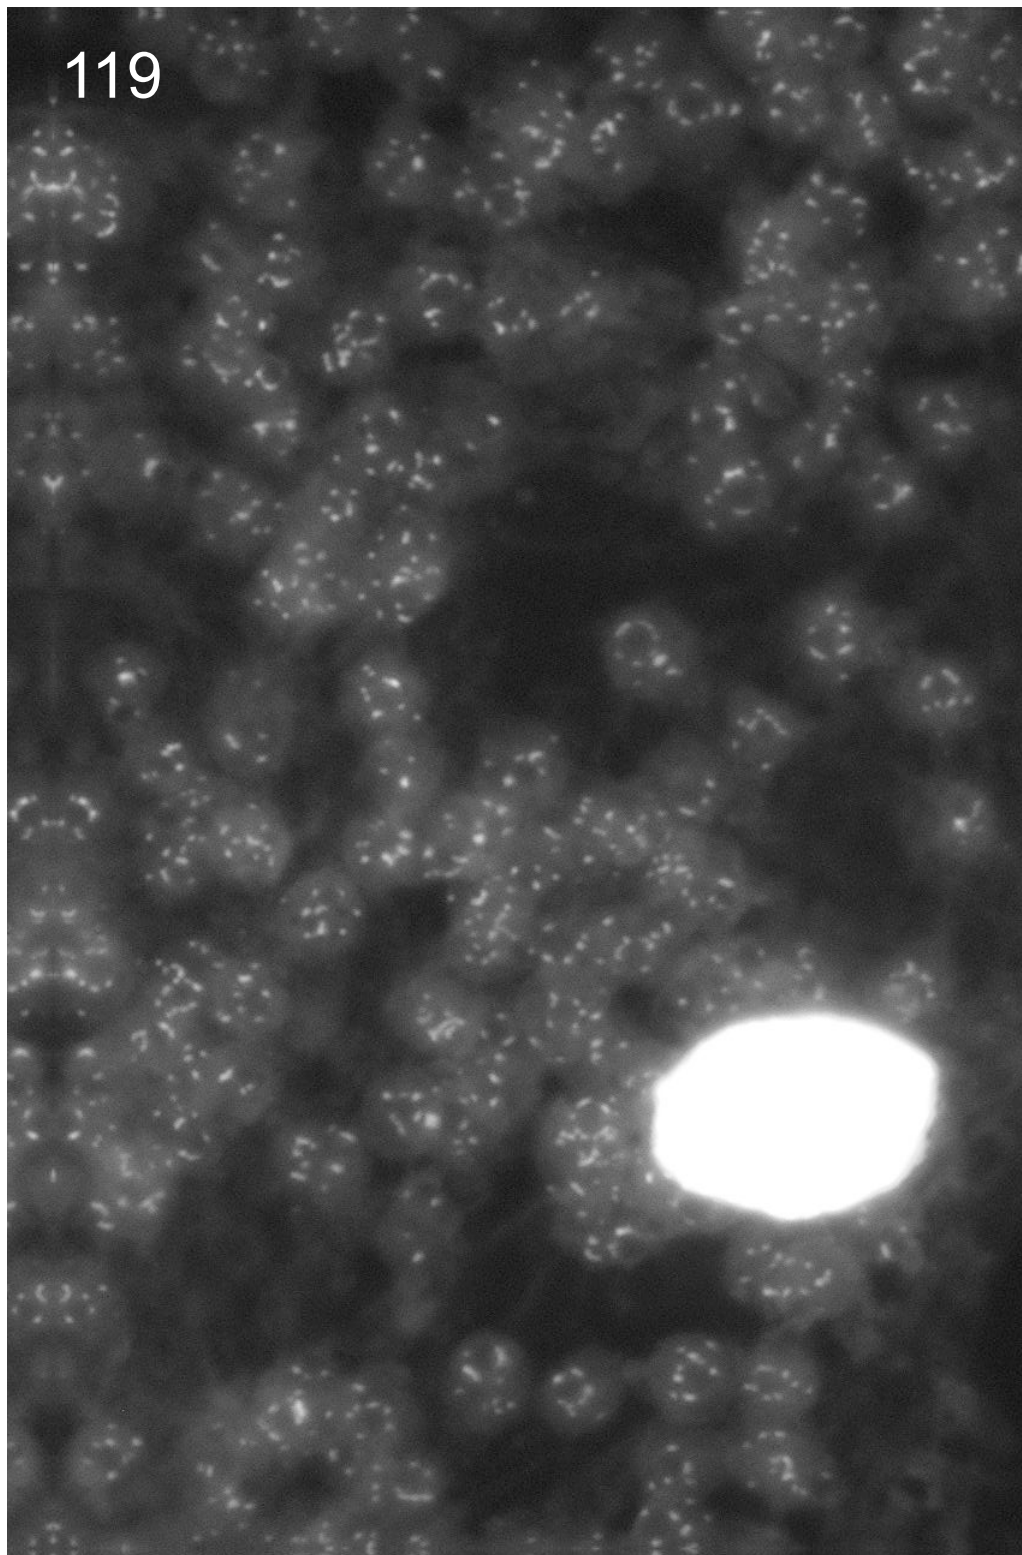

Examples of DAPI stained mesophyll cells of leaf stages V and VI

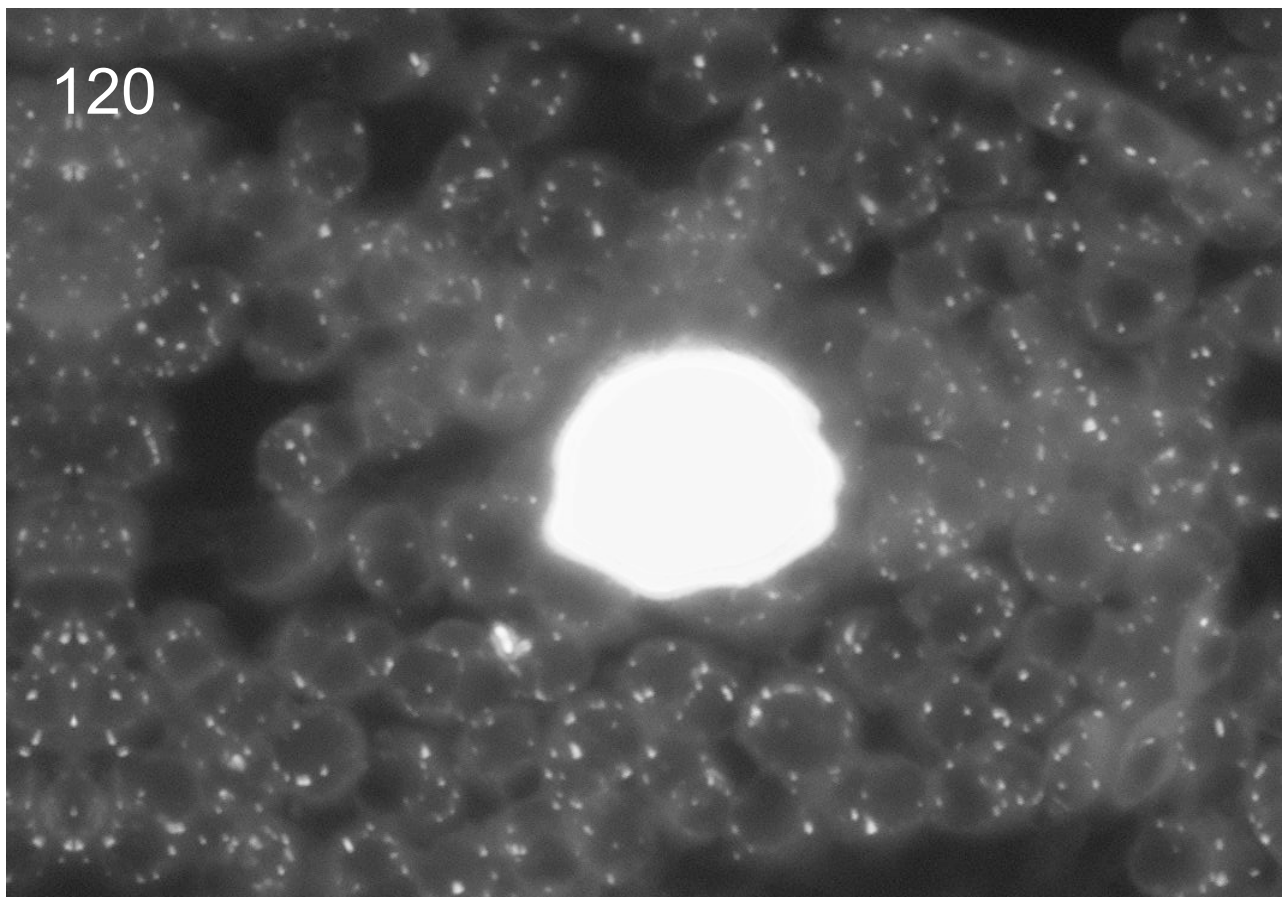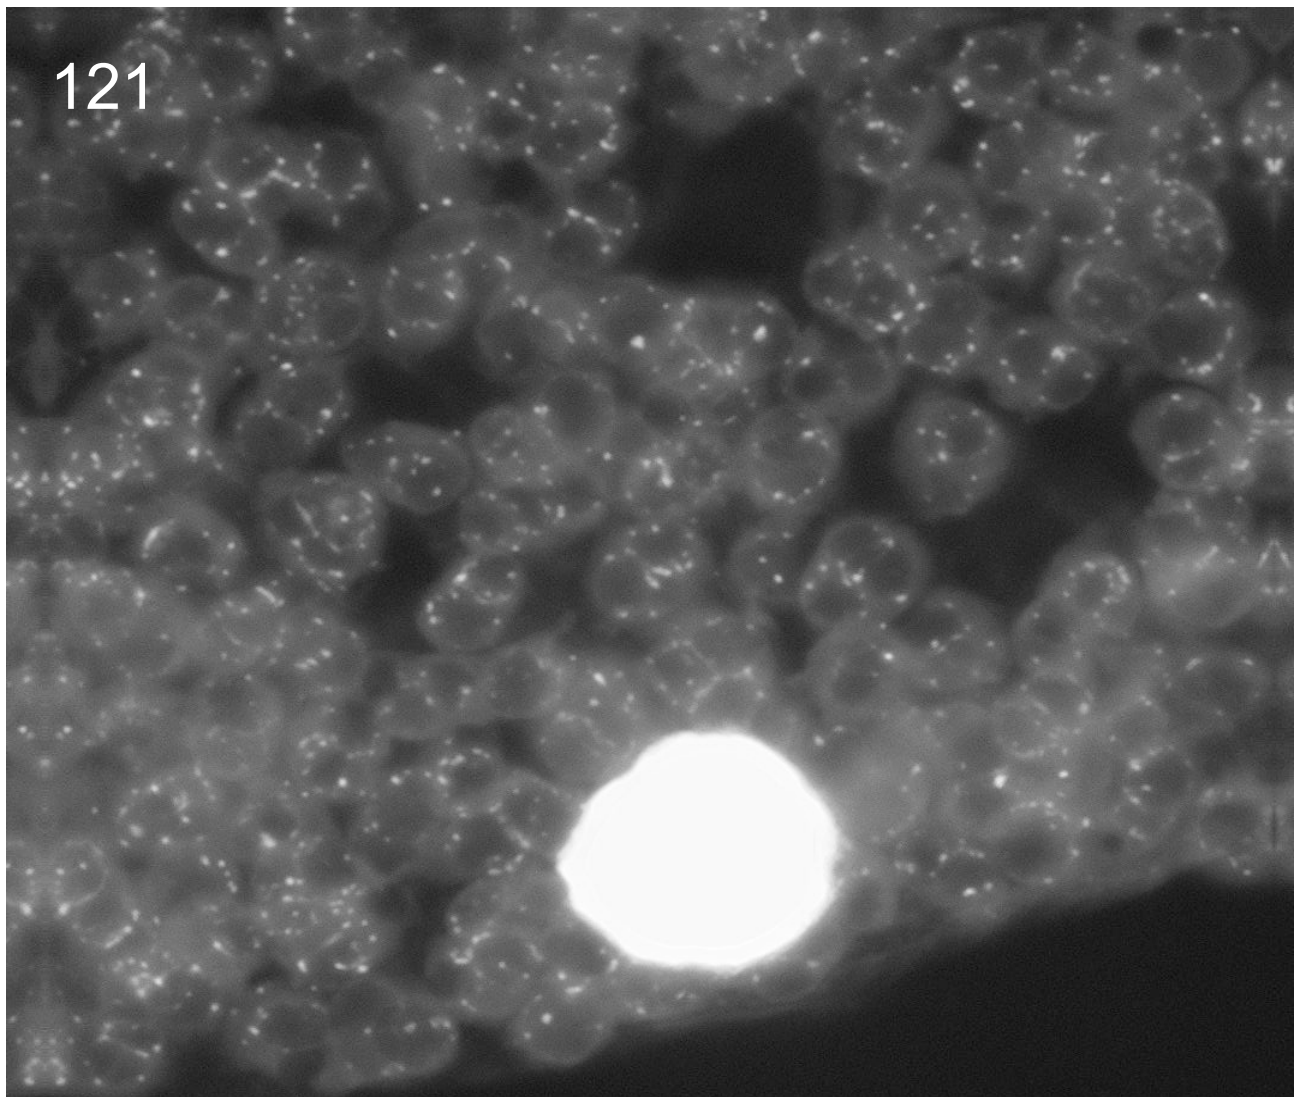

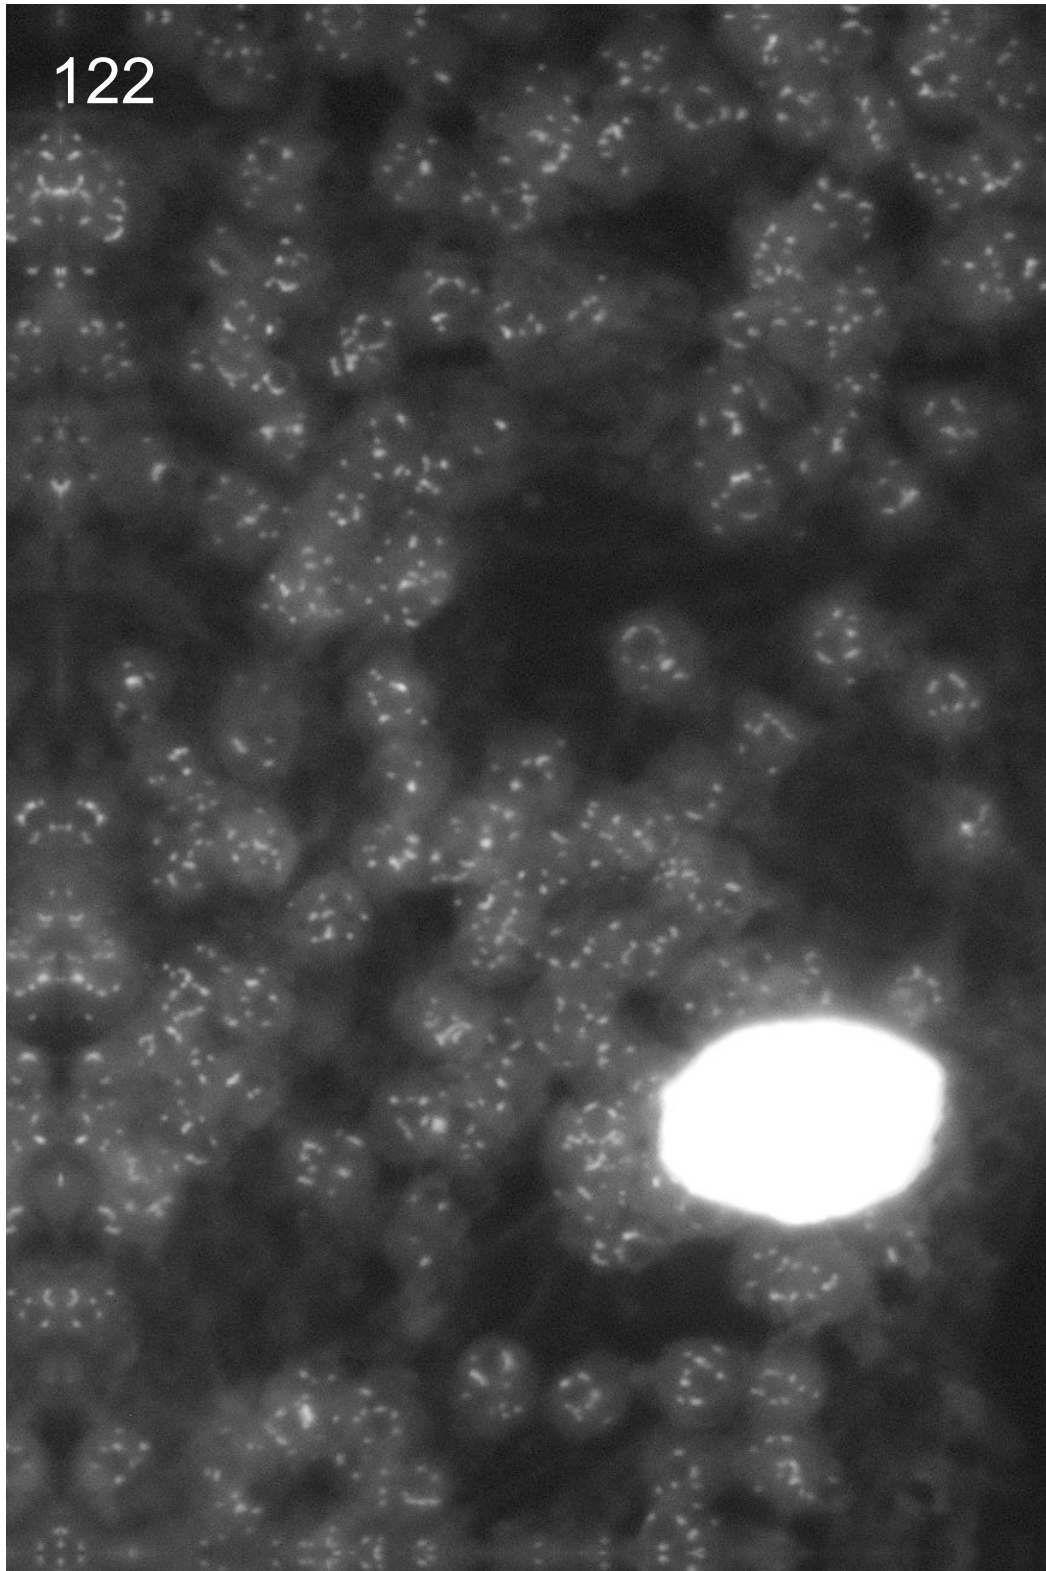

Supplement: supp_tpc.113.117465_tpc117465SupplementalDS3.pdf [file supp_tpc.113.117465_tpc117465SupplementalDS3.pdf]
