# Supplementary material
Source: PubMed Central journal article supplement (PMC4001396)

Supplemental Dataset 4 online

## Maize (*Zea mays*)

Examples of DAPI stained mesophyll cells of leaf stages I and II

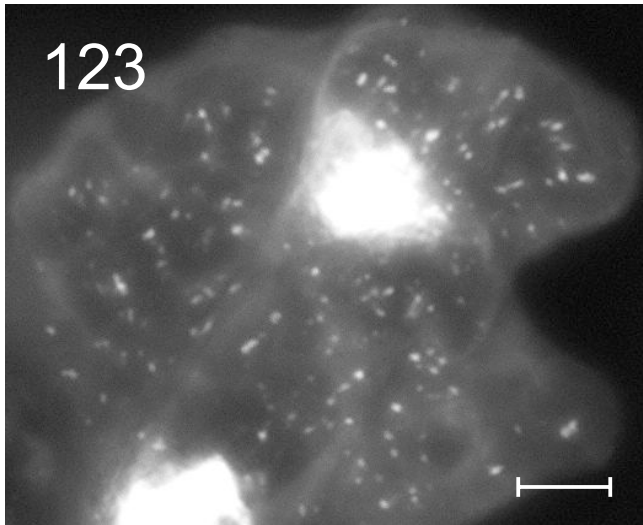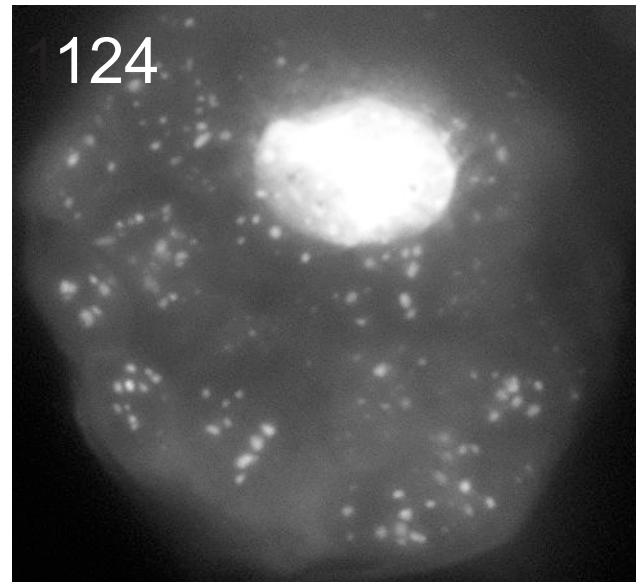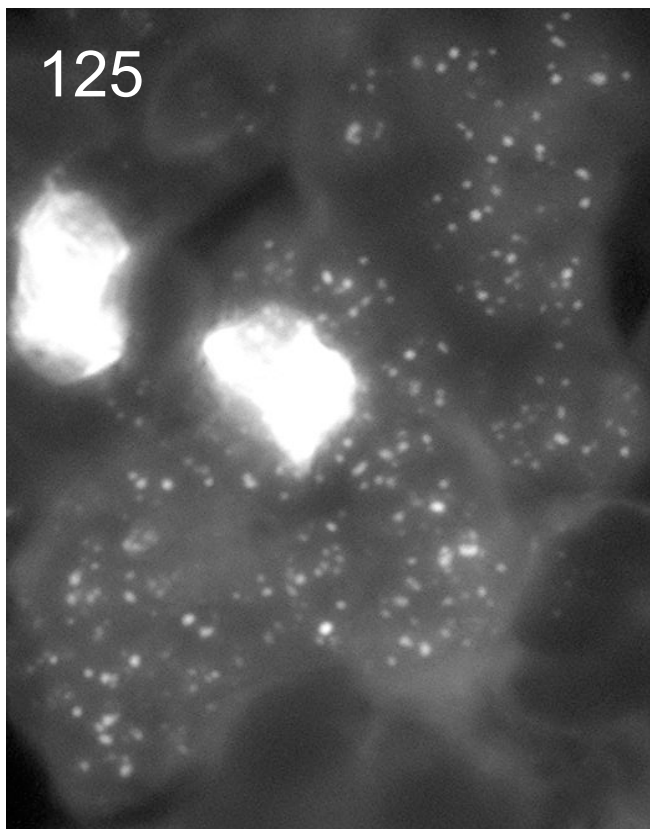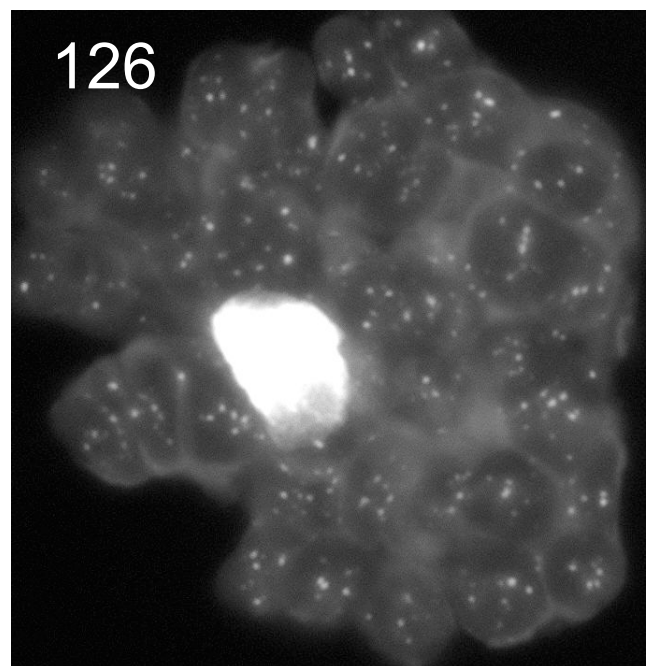

Bar: 5  $\mu$ m, in (123) also for (123 - 134)

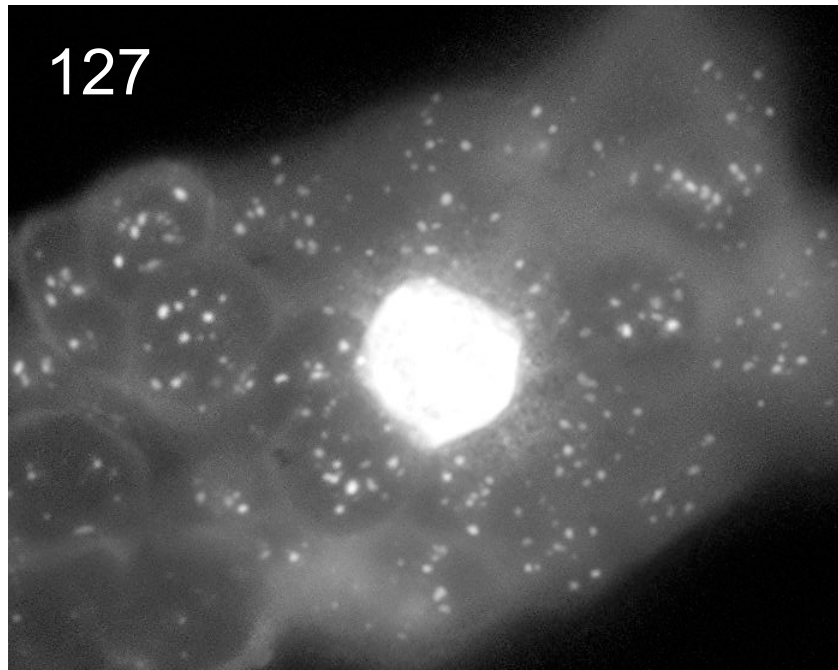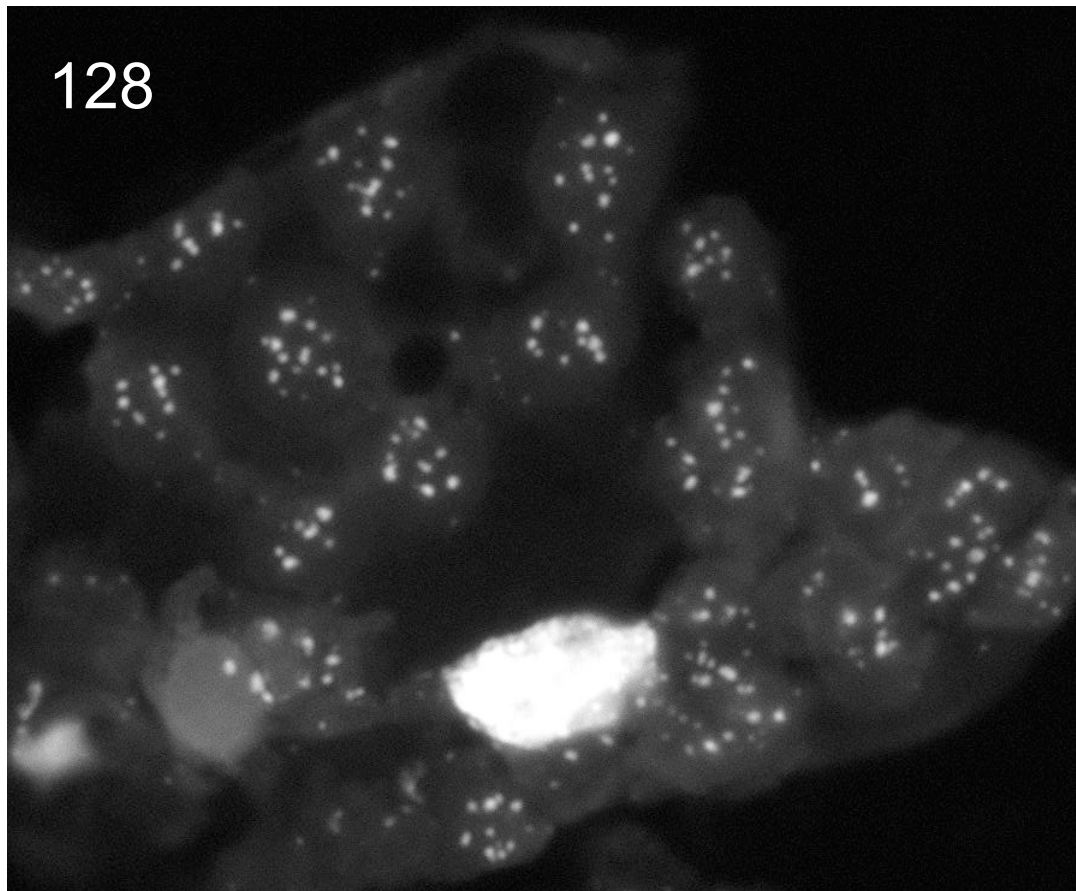

Examples of DAPI stained mesophyll cells of leaf stages III and IV

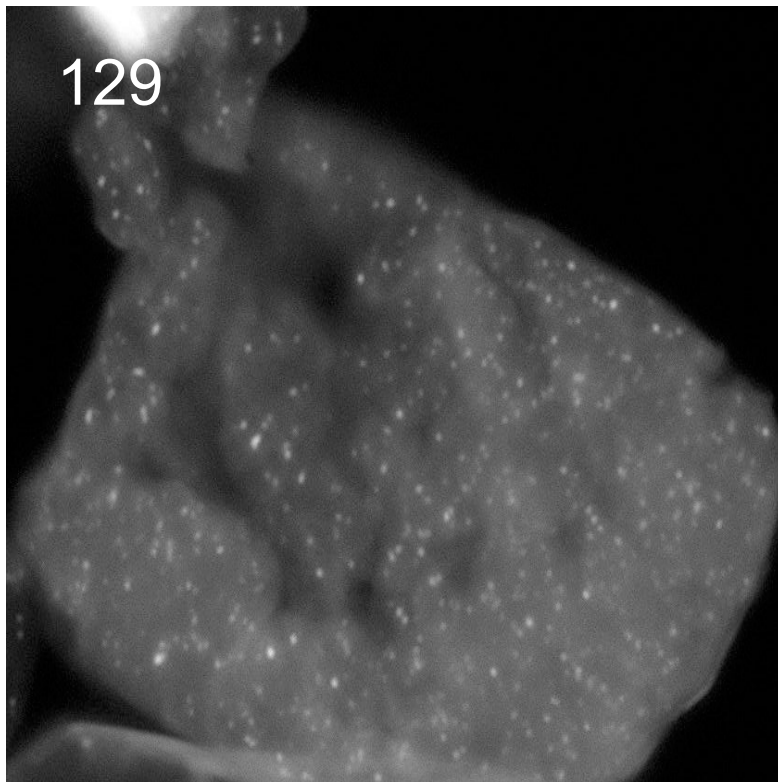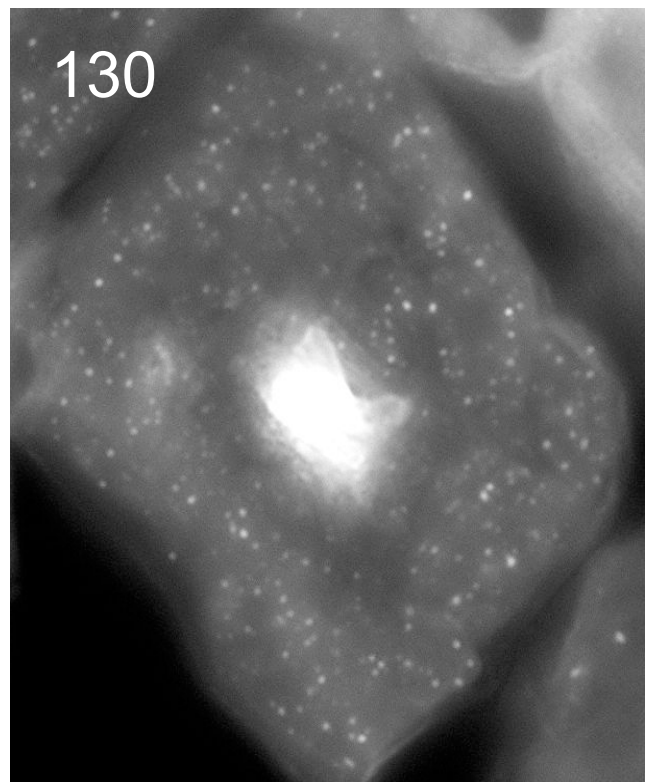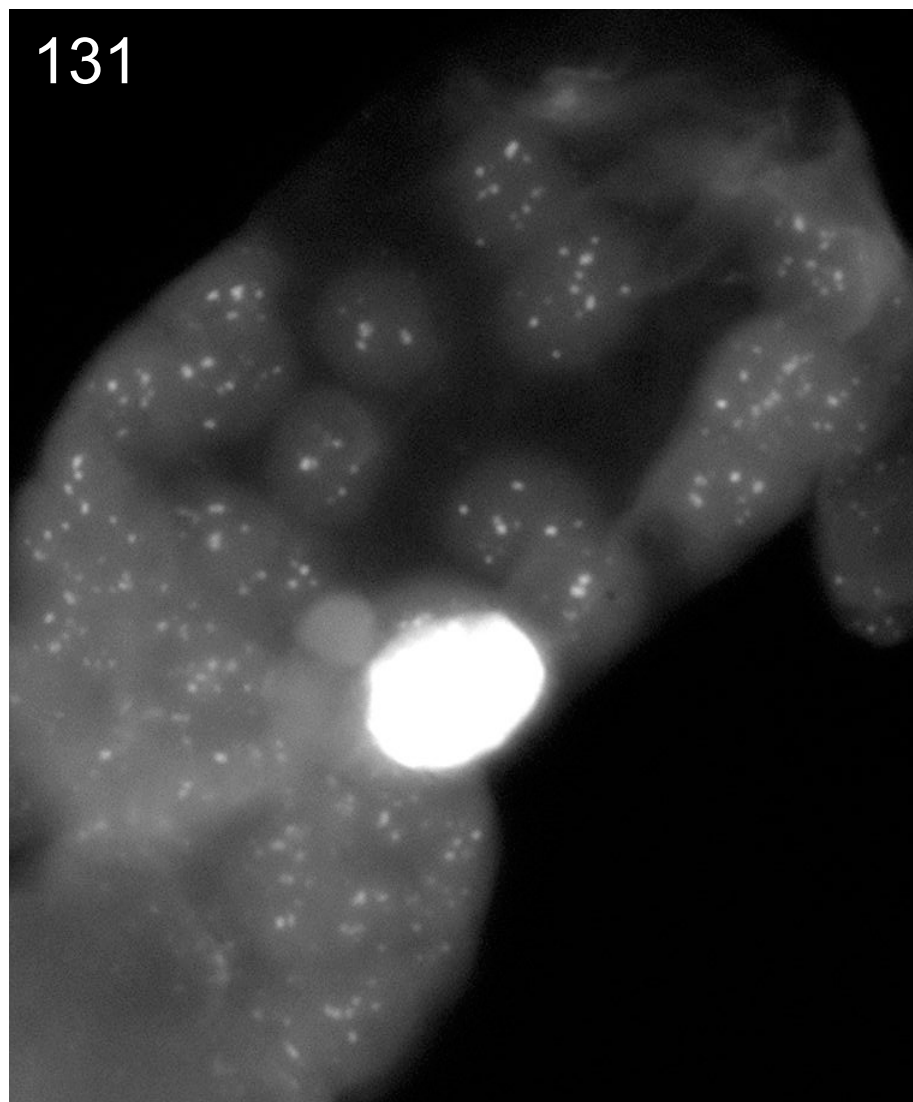

Examples of DAPI stained mesophyll cells of leaf stages V and VI

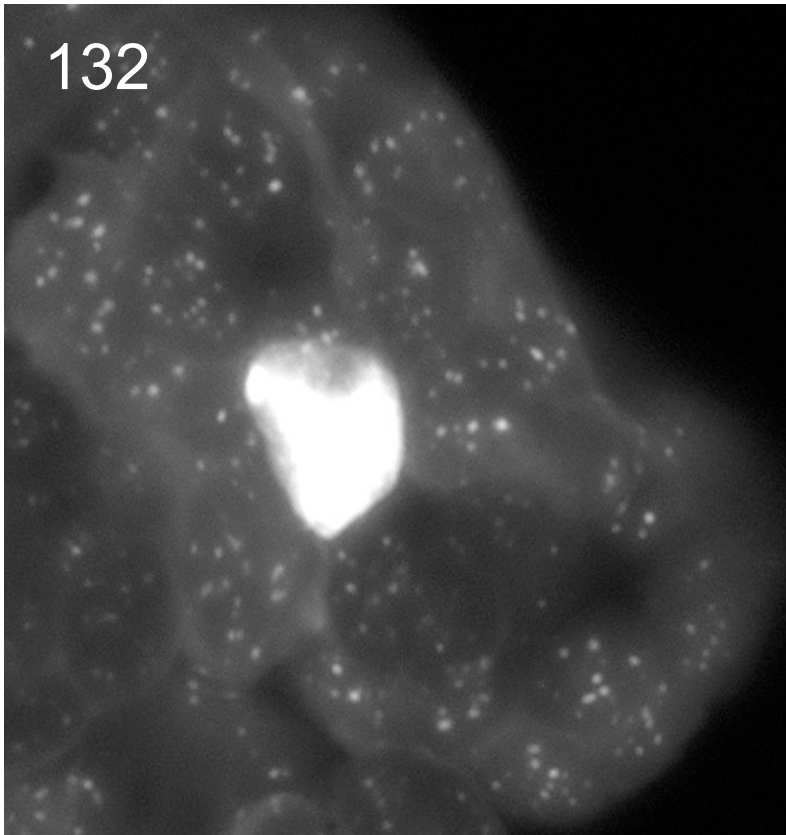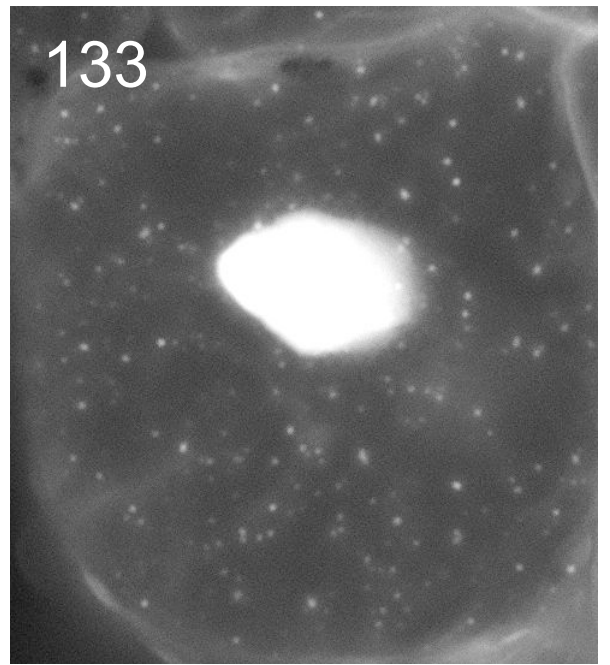

134

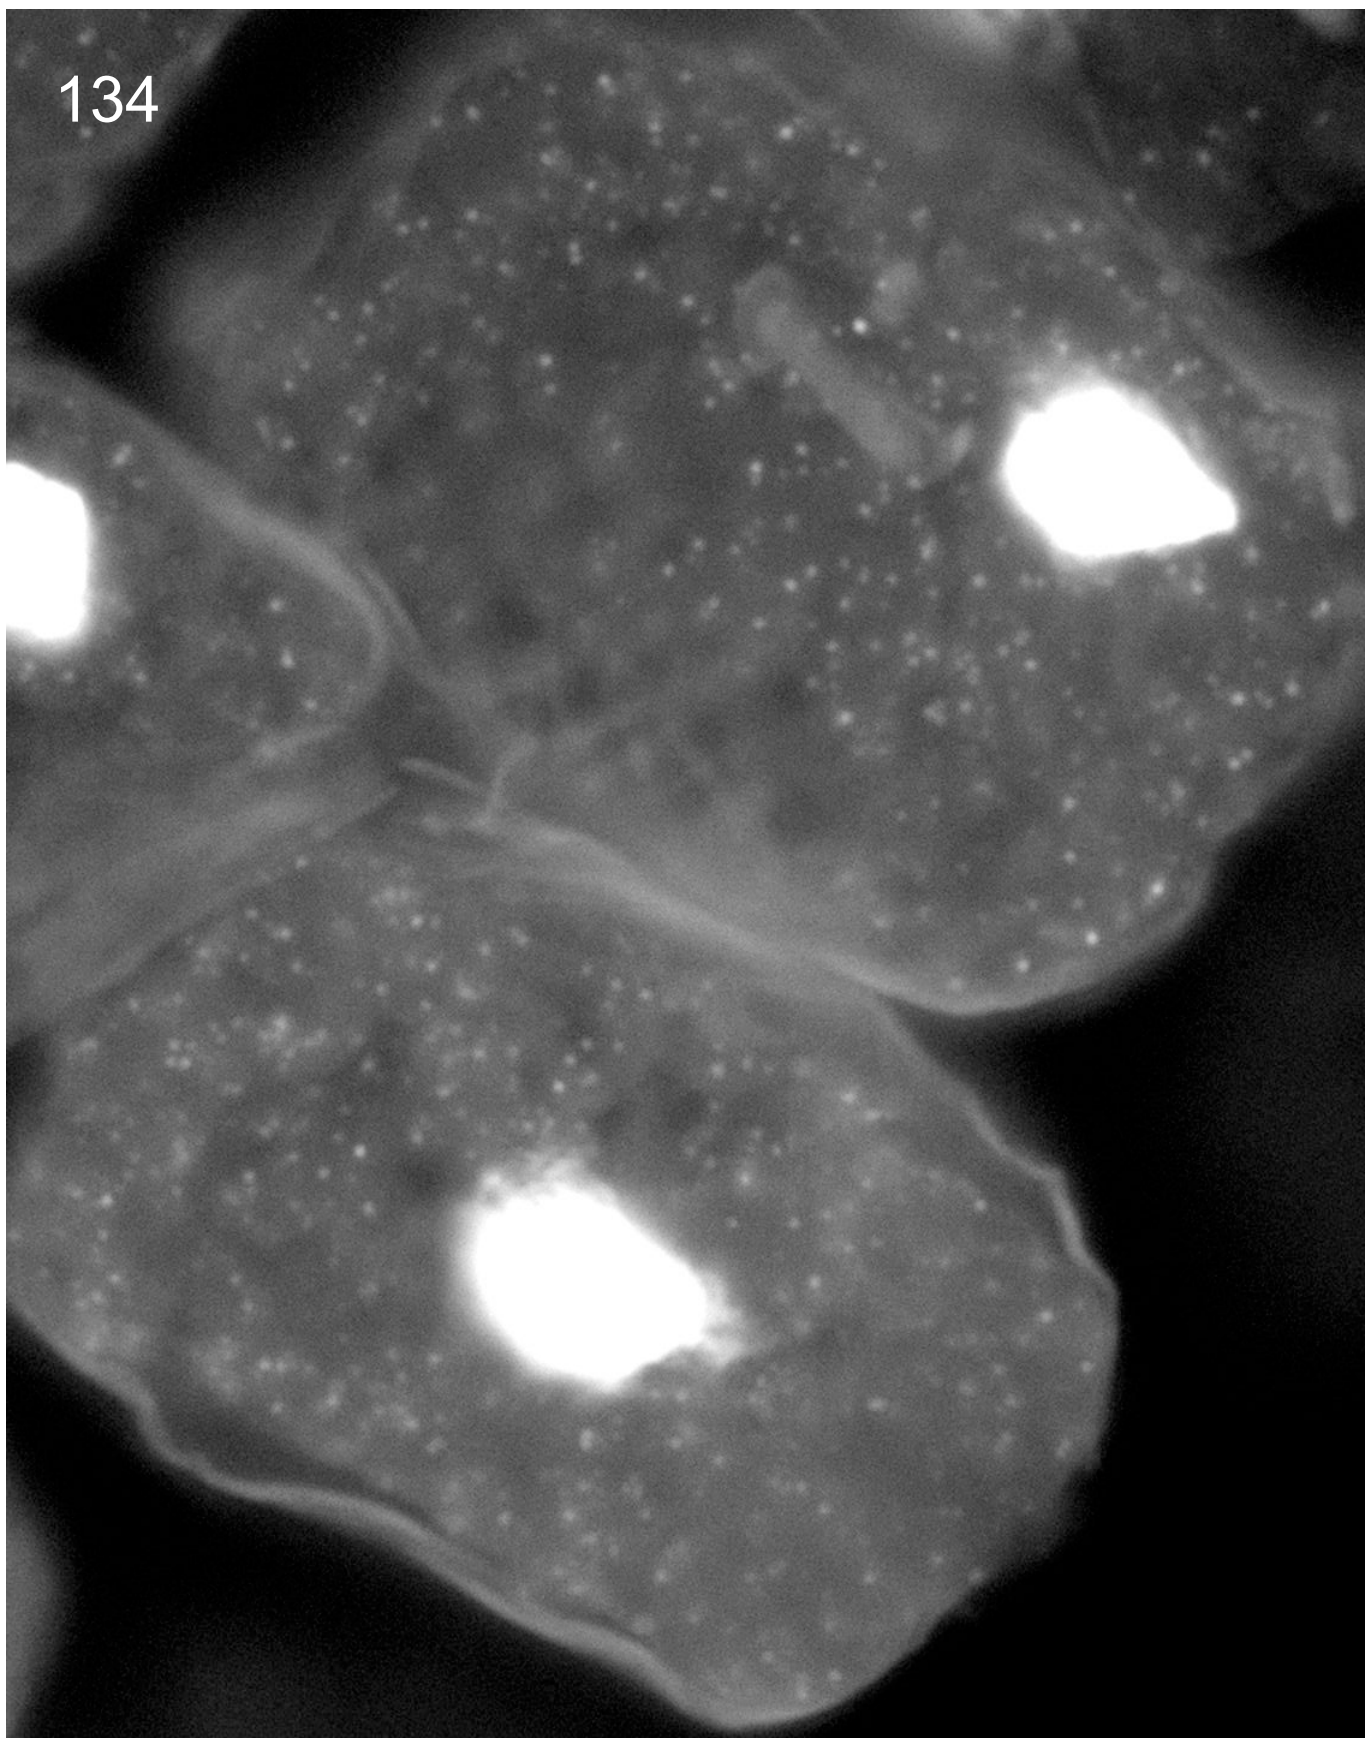

Supplement: supp_tpc.113.117465_tpc117465SupplementalDS4.pdf [file supp_tpc.113.117465_tpc117465SupplementalDS4.pdf]
